# Supplementary material for: Evolution of a plant gene cluster in Solanaceae and emergence of metabolic diversity
Source: eLife. 2020 Jul 2;9:e56717. doi: 10.7554/eLife.56717 (PMC7386920; doi:10.7554/eLife.56717)
Supplement: Figure 2—source data 1. — Peak area percentage of seven major trichome acylsugars in M82 and IL7-4. [file elife-56717-fig2-data1.xlsx]

## Sheet: Sheet1
			Figure 2—source data 1. Data used to make Figure 2B. Peak area percentage of seven major trichome acylsugars in M82 and IL7-4. The sum of the peak area percentage of each acylsugar is equal to 100% in each sample
				M82			IL7-4
			S3:15(5,5,5)	0.050466	0.060896	0.035979	0.031143	0.016979	0.02101
			S4:16 (2,4,5,5)	0.089956	0.086372	0.069909	0.056524	0.059113	0.052584
			S4:17 (2,5,5,5)	0.545735	0.507396	0.536118	0.483028	0.458273	0.443467
			S3:20 (5,5,10)	0.004638	0.007345	0.004695	0.031285	0.041211	0.043518
			S4:22 (2,5,5,10)	0.013348	0.025193	0.016953	0.100596	0.124034	0.110818
			S3:22 (5,5,12)	0.139072	0.154175	0.16266	0.149147	0.135526	0.160741
			S4:24 (2,5,5,12)	0.156785	0.158622	0.173686	0.148277	0.164864	0.16786
