# Supplementary material for: Evolution of a plant gene cluster in Solanaceae and emergence of metabolic diversity
Source: eLife. 2020 Jul 2;9:e56717. doi: 10.7554/eLife.56717 (PMC7386920; doi:10.7554/eLife.56717)
Supplement: Figure 3—source data 1. — Quantification of seven major trichome acylsugars in the CRISPR mutants sl-aacs1 and sl-aech1, as well as the parent M82. [file elife-56717-fig3-data1.xlsx]

## Sheet: Sheet1
	Figure 3—source data 1. Data used to make Figure 3B. Quantification of seven major trichome acylsugars in the CRISPR mutants sl-aacs1 and sl-aech1, as well as the parent M82. Two independent T2 generation transgenic lines for each mutant were used for analysis. The peak area/internal standard (IS) normalized by leaf dry weight (DW) is shown.
		S3:15 (5,5,5)	S4:16 (2,4,5,5)	S4:17 (2,5,5,5)	S3:20 (5,5,10)	S4:22 (2,5,5,10)	S3:22 (5,5,12)	S3:24 (2,5,5,12)
	sl-aacs1_T2-18	0.002973	0.083606	0.710173	4.59e-05	0.000493	0.000814	0.001772
		0.002567	0.053173	0.5346	4.05e-05	0.000523	0.00033	0.000682
		0.002243	0.047451	0.469018	0	0.000245	0.000155	0.000628
		0.003586	0.031045	0.549158	6.19e-05	0	5.32e-05	0.000747
		0.002193	0.040437	0.435944	0	0.000126	0.000119	0.000139
		0.004904	0.153831	1.26369	2.51e-05	0.000392	5.93e-05	0.001037
	sl-aacs1_T2-13	0.000605	0.005721	0.098454	1.07e-05	0.000109	0.00011	0.000189
		0.001907	0.016271	0.222023	1.98e-05	7.63e-05	3.1e-05	0.000238
		0.002567	0.022229	0.419004	1.27e-05	0	0.00019	0.00048
		0.003452	0.057453	0.681109	8.2e-06	0.000226	7.08e-05	0.000626
		0.003506	0.036742	0.42117	1.1e-05	9.48e-05	3.29e-05	0.000307
		0.006688	0.084346	1.03039	9.25e-06	0.000171	0.000103	0.000657
	sl-aech1_T2-9	0.007975	0.050899	1.67673	3.5e-05	0.000307	0.000897	0.002608
		0.007826	0.031775	1.23274	2.55e-05	0.00017	0.001248	0.002658
		0.003854	0.015127	0.706264	5.33e-06	9.26e-05	0.000689	0.001949
		0.006045	0.01734	0.696426	2.58e-05	0.000149	0.001005	0.001744
		0.012797	0.064415	2.07163	6.27e-05	0.000467	0.001307	0.003906
		0.019157	0.110411	3.1039	5.24e-05	0.000696	0.001988	0.005277
	sl-aech1_T2-11	0.025782	0.078931	2.04189	0	0.000474	0.001653	0.003859
		0.009862	0.029578	1.29105	4.17e-05	0.000111	0.001356	0.003258
		0.018191	0.096998	3.23706	3.46e-05	0.00068	0.001385	0.005225
		0.007746	0.028929	1.11681	2.92e-05	0.000276	0.001026	0.002194
		0.013488	0.040581	1.73674	2.03e-05	0.000623	0.001128	0.004444
		0.012196	0.039711	1.44004	1.76e-05	0.000356	0.001187	0.00303
	M82	0.125758	0.128334	4.28138	0.015638	0.053864	1.77905	2.2133
		0.074911	0.100532	2.80986	0.011046	0.037921	1.2018	1.48067
		0.123764	0.161439	3.83613	0.018244	0.059933	1.74072	2.12773
		0.327449	0.196731	5.51659	0.023855	0.076221	2.28163	2.66182
		0.08079	0.102595	3.40953	0.010863	0.039954	1.29184	1.76299
		0.16748	0.204084	4.07827	0.026891	0.090043	2.14534	2.50017
