# Supplementary material for: Evolution of a plant gene cluster in Solanaceae and emergence of metabolic diversity
Source: eLife. 2020 Jul 2;9:e56717. doi: 10.7554/eLife.56717 (PMC7386920; doi:10.7554/eLife.56717)
Supplement: Figure 4—source data 1. — Aliphatic fatty acids of different chain lengths were used as the substrates to test Sl-AACS1 acyl-CoA synthetase activity. [file elife-56717-fig4-data1.xlsx]

## Sheet: Sheet1
			Figure 4—source data 1. Data used to make Figure 4B. Aliphatic fatty acids of different chain lengths were used as the substrates to test Sl-AACS1 acyl-CoA synthase activity. Mean amount of acyl-CoAs generated (nmol min-1 mg-1 proteins) was used to represent enzyme activities.
			Fatty acid substrates	Measurement 1	Measurement 2	Measurement 3
			C2:0	8.55094	9.46963	10.459
			C4:0	4.80548	2.40274	3.74545
			C6:0	78.1598	70.5275	71.5169
			C8:0	116.816	116.109	98.7951
			C10:0	80.4919	72.0116	67.7715
			C12:0	36.9598	33.4264	36.8185
			C14:0	16.3245	15.9005	13.0031
			C16:0	4.87615	3.67478	4.24013
			C18:0	9.61097	8.69227	9.32829
			C18:2	7.4909	11.731	11.095
			C12:OH	8.69227	11.0244	8.12692
			C14:OH	4.02813	8.69227	5.51217
			C10:1	64.45	59.0085	63.1073
			C16:1	6.3602	8.12692	8.19759
			iC10:0	126.78	124.66	126.215
			None	4.16946	3.60411	5.15883
