# Supplementary material for: Evolution of a plant gene cluster in Solanaceae and emergence of metabolic diversity
Source: eLife. 2020 Jul 2;9:e56717. doi: 10.7554/eLife.56717 (PMC7386920; doi:10.7554/eLife.56717)
Supplement: Figure 4—source data 2. — N. benthamiana leaf membrane lipid acyl chain composition. [file elife-56717-fig4-data2.xlsx]

## Sheet: Sheet1
	Figure 4—source data 2. Data used to make Figure 4D and Figure 4-figure supplement 1C. N. benthamiana leaf membrane lipid acyl chain composition. The results are from infiltrating Sl-AACS1 or Sl-AECH1 individually, and infiltrating Sl-AECH1 and Sl-AACS1 together. Mole percentage (Mol %) of the acyl chains from membrane lipids with carbon number 12, 14, 16, and 18 are shown.
		Acyl chains	Empty vector			pEAQ_Sl-AACS1			pEAQ_Sl-AECH1			pEAQ_Sl-AACS1 + pEAQ_Sl-AECH1
	PC(phosphatidylcholine)	C12	0	0	0	0	0	0	0.703772	0.913978	0.995049	1.34861	1.1075	0.951376
		C14	2.33664	4.27935	2.03342	2.01326	3.17614	3.6232	5.57757	6.7703	5.15511	6.69642	6.90441	7.57597
		C16	35.1317	33.6522	30.9762	32.5265	31.2766	32.321	30.1206	28.7219	29.2647	27.1907	27.5341	27.6647
		C18	62.5316	62.0684	66.9904	65.4603	65.5472	64.0558	63.5981	63.5938	64.5851	64.7642	64.454	63.808
	PG (phosphatidylglycerol )	C12	0	0	0	0	0	0	0	0	0	0	0	0
		C14	0	1.16536	0	0	4.94113	5.78422	9.46892	12.9895	11.5529	9.59852	12.6104	12.5202
		C16	58.563	57.9843	58.3657	59.7299	55.423	54.3945	53.4787	53.5536	51.6643	53.2742	52.8323	53.2092
		C18	41.437	40.8503	41.6343	40.2701	39.6359	39.8213	37.0524	33.4569	36.7829	37.1273	34.5573	34.2705
	DGDG (digalactosyldiacylglycerol)	C12	0	0	0	0	0	0	0	0	0	0	0	0
		C14	0	0	0	0	0	0	0.433053	0	0	0.414948	0.775985	0.560948
		C16	21.386	21.8097	21.6031	21.1185	20.496	22.9996	21.2074	20.8263	20.0526	17.9664	19.2369	18.6771
		C18	78.6141	78.1903	78.3969	78.8815	79.504	77.0004	78.3595	79.1737	79.9474	81.6186	79.9871	80.762
	SQDG(sulfoquinovosyl diacylglycerol)	C12	0	0	0	0	0	0	0	0	0	0.576061	0	0
		C14	0	0	0	0	0	0	3.27786	1.78374	2.09225	2.30971	2.42015	5.96526
		C16	57.6175	58.1769	56.5203	60.7319	58.6987	60.4479	54.096	59.1741	53.8377	51.0012	52.2936	53.9089
		C18	42.3825	41.8231	43.4797	39.2681	41.3013	39.5521	42.6262	39.0421	44.0701	46.113	45.2862	40.1258
	MGDG (monogalactosyldiacylglycerol)	C12	0	0	0	0	0	0	0	0	0	0.108856	0.166966	0
		C14	0.19154	1.0303	0.511654	1.39462	0.615362	0.371343	1.17262	0.996736	1.0187	1.17614	1.13112	1.19988
		C16	17.127	17.2865	16.7374	18.2031	18.0528	18.4323	18.8054	18.8308	18.7228	17.4183	17.7034	16.835
		C18	82.6815	81.6832	82.751	80.4023	81.3318	81.1964	80.022	80.1724	80.2585	81.2968	80.9986	81.9651
	PI (phosphtatidylinositol) and PE (phosphtatidylethanolamine)	C12	0	0	0	0	0	0	0	0	0	0.578909	0	0
		C14	6.06492	4.55244	3.75371	12.2689	2.92969	6.58333	7.59145	7.0927	5.62796	6.3099	6.57366	8.55159
		C16	34.612	35.945	34.0238	33.581	33.9751	33.2825	29.563	31.357	29.5955	27.6321	28.2564	29.2611
		C18	59.3231	59.5026	62.2225	54.1501	63.0953	60.1341	62.8456	61.5503	64.7766	65.4791	65.1699	62.1873
