# Supplementary material for: Evolution of a plant gene cluster in Solanaceae and emergence of metabolic diversity
Source: eLife. 2020 Jul 2;9:e56717. doi: 10.7554/eLife.56717 (PMC7386920; doi:10.7554/eLife.56717)
Supplement: Figure 5—source data 1. — Silencing Sq-AACS1 or Sq-AECH1 in S. quitoense using VIGS leads to reduction of total acylsugars. [file elife-56717-fig5-data1.xlsx]

## Sheet: Main-VIGS
		Figure 5—source data 1. Data used to make Figure 5C and 5D. Silencing Sq-AACS1 or Sq-AECH1 in S. quitoense using VIGS leads to reduction of total acylsugars. The reduced gene expression of Sq-AACS1 or Sq-AECH1 correlates with decreased acylsugar levels in S. quitoense.

## Sheet: 5C, SQ acylsugar levels
	Peak responses (peak area/internal standard) of major acylsugars in S. quitoense
Plants	GlcNAc-I3:22	G-I3:22	X-I3:22	GlcNAc-I3:24	G-I3:24	I3:22	I4:24	I4:24	I3:24	I4:26	Total response	Leaf dry weight (mg)	Total response/dry weight
Empty_1	0.0489096	0.126554	0.0264946	0.0230699	0.0721148	0.595047	9.31351	9.31351	1.19738	1.38778	22.1044	0.97	22.788
Empty_2	0.0749764	0.203225	0.0373921	0.0307722	0.0930743	0.996127	13.0245	13.0245	1.65858	1.93219	31.0752	1.32	23.5418
Empty_3	0.0327511	0.0882468	0.0164347	0.0112888	0.0416429	0.412325	6.23141	6.23141	0.755021	0.845198	14.6657	0.64	22.9152
Empty_4	0.0612302	0.140417	0.0276154	0.0224951	0.0607059	0.605527	9.03181	9.03181	1.0565	1.2522	21.2903	0.88	24.1935
Empty_5	0.0470385	0.119214	0.0237138	0.0170968	0.0483582	0.729773	9.58292	9.58292	1.17254	1.30869	22.6323	1.38	16.4002
Empty_6	0.0592926	0.147862	0.0241044	0.0173613	0.0587207	0.712301	8.10876	8.10876	1.04749	0.973374	19.258	1.3	14.8139
Empty_7	0.048882	0.109488	0.0246594	0.0211907	0.0478547	0.451019	7.31163	7.31163	0.685699	0.887966	16.9	1.25	13.52
Empty_8	0.0930591	0.214874	0.0430283	0.0343884	0.0925357	0.832348	11.2188	11.2188	1.33239	1.60666	26.6868	1.22	21.8744
Empty_9	0.145314	0.33513	0.0619258	0.0581246	0.150302	1.46907	17.3465	17.3465	2.27775	2.68298	41.8736	2.14	19.5671
Empty_10	0.0751488	0.192618	0.0394589	0.0266607	0.0814038	0.872675	11.3735	11.3735	1.2735	1.54509	26.8536	1.24	21.6561
Empty_11	0.088577	0.183528	0.0390195	0.0286791	0.0790776	1.00216	13.8826	13.8826	1.45032	1.78673	32.4232	1.82	17.815
Empty_12	0.147659	0.40555	0.0712218	0.0579965	0.162331	1.45888	18.1599	18.1599	2.25292	2.87079	43.7471	2.21	19.7951
Empty_13	0.241558	0.549926	0.112558	0.0873988	0.22706	1.69102	22.2816	22.2816	2.43394	3.38304	53.2896	3.46	15.4016
Empty_14	0.0563267	0.12882	0.0278235	0.0171504	0.0457711	0.591447	8.11407	8.11407	0.845791	0.927222	18.8685	0.63	29.95
Empty_15	0.0579701	0.123673	0.0239516	0.0192706	0.0572216	0.64197	8.94847	8.94847	1.13438	1.18363	21.139	1.01	20.9297
Empty_16	0.0582883	0.133671	0.0265424	0.0205452	0.0490402	0.745801	9.69082	9.69082	1.0547	1.22311	22.6933	2.22	10.2222
Sq-AACS1_01	0.0120451	0.0295496	0.00804702	0.00569971	0.00982317	0.117459	2.27018	2.27018	0.215494	0.195689	5.13416	0.55	9.33483
Sq-AACS1_02	0.0968678	0.20648	0.0455863	0.036989	0.089018	1.0187	14.3577	14.3577	1.6944	2.24398	34.1474	2.98	11.4589
Sq-AACS1_03	0.0202934	0.0367548	0.0111782	0.00267277	0.00754803	0.102893	2.98293	2.98293	0.0890912	0.172742	6.40903	1.62	3.95619
Sq-AACS1_04	0.0905231	0.244745	0.0406171	0.0280583	0.0712231	0.820489	12.2238	12.2238	1.11699	1.46117	28.3213	1.58	17.9249
Sq-AACS1_05	0.00273289	0.00518148	0.000598903	0.000459683	0.00188697	0.0249712	0.368802	0.368802	0.0455499	0.016523	0.835508	0.76	1.09935
Sq-AACS1_06	0.0465307	0.108241	0.0213627	0.013255	0.0330378	0.492993	8.47531	8.47531	0.725374	0.969394	19.3608	1.85	10.4653
Sq-AACS1_07	0.158613	0.367145	0.0682411	0.0525938	0.13562	1.439	18.3118	18.3118	1.85903	2.56573	43.2696	2.9	14.9206
Sq-AACS1_08	0.135488	0.356859	0.0655588	0.0496683	0.141094	1.34838	17.0485	17.0485	2.11331	2.68712	40.9944	2.9	14.136
Sq-AACS1_09	0.0242846	0.0572872	0.0128124	0.00756426	0.0199908	0.249036	4.93983	4.93983	0.319801	0.453564	11.024	2.01	5.48457
Sq-AACS1_10	0.0758651	0.153226	0.035181	0.0207264	0.0458407	0.681745	10.894	10.894	0.861005	1.22916	24.8907	2	12.4454
Sq-AACS1_11	0.0023601	0.00962161	0.0010134	0.000484715	0.00141089	0.0280074	0.449897	0.449897	0.0245478	0.0225912	0.989832	0.29	3.41321
Sq-AACS1_12	0.00269358	0.00403239	0.000870694	0.00041446	0.00192405	0.0256441	0.437729	0.437729	0.0169925	0.02394	0.951969	0.59	1.61351
Sq-AACS1_13	0.0369777	0.0729171	0.0169757	0.00785692	0.0195371	0.319096	7.09372	7.09372	0.342615	0.595021	15.5984	2.71	5.75588
Sq-AACS1_14	0.0583848	0.171892	0.0284656	0.0231811	0.0671385	0.770241	11.1036	11.1036	1.29559	1.55234	26.1743	1.39	18.8305
Sq-AACS1_15	0.0657885	0.161286	0.0293861	0.0255708	0.0608962	0.703579	9.51587	9.51587	1.20697	1.33608	22.6213	1.44	15.7092
Sq-AACS1_16	0.0320075	0.071455	0.0165796	0.00703828	0.0211172	0.248135	5.55839	5.55839	0.299217	0.45318	12.2655	1.44	8.51772
Sq-AECH1_1	0.0289496	0.0579648	0.0147199	0.00970277	0.02356	0.232448	3.69969	3.69969	0.371652	0.361495	8.49986	0.37	22.9726
Sq-AECH1_2	0.0378026	0.0833341	0.0225445	0.0113744	0.0266356	0.337356	6.48108	6.48108	0.454087	0.708283	14.6436	1.61	9.09539
Sq-AECH1_3	0.0398067	0.0754078	0.0185488	0.0101138	0.0236609	0.342405	6.34765	6.34765	0.461538	0.675142	14.3419	2.15	6.67066
Sq-AECH1_4	0.0337479	0.0680561	0.0148028	0.0146774	0.0362619	0.219143	5.1993	5.1993	0.428774	0.833208	12.0473	1.4	8.60519
Sq-AECH1_5	0.118259	0.237027	0.0524127	0.0455935	0.11078	1.04764	13.4521	13.4521	1.73316	2.1982	32.4473	3.15	10.3007
Sq-AECH1_6	0.0949083	0.238138	0.0449193	0.0392747	0.104695	1.21609	15.7546	15.7546	1.92626	2.30575	37.4793	2.46	15.2355
Sq-AECH1_7	0.0232861	0.0411277	0.0112119	0.00904737	0.0219273	0.101762	3.5607	3.5607	0.215835	0.576761	8.12236	1.45	5.60163
Sq-AECH1_8	0.0940166	0.208927	0.0449006	0.0260463	0.0691572	0.796945	11.0931	11.0931	1.01908	1.40653	25.8518	2.01	12.8616
Sq-AECH1_9	0.00436591	0.00544065	0.00238137	0.000546445	0.00455223	0.0184517	0.463438	0.463438	0.0272291	0.0728647	1.06271	0.25	4.25083
Sq-AECH1_10	0.017569	0.0360621	0.00935597	0.00729136	0.0187584	0.0706267	2.44082	2.44082	0.15657	0.488703	5.68657	1.89	3.00877
Sq-AECH1_11	0.0131978	0.0303198	0.0071847	0.00593991	0.0152538	0.0788984	2.11169	2.11169	0.139015	0.350767	4.86395	1.42	3.42531
Sq-AECH1_12	0.195315	0.420345	0.0796295	0.0547417	0.143012	1.50838	17.6711	17.6711	2.01261	2.53306	42.2893	2.21	19.1354
Sq-AECH1_13	0.014043	0.0296725	0.00774192	0.00745285	0.0166664	0.0571356	2.24083	2.24083	0.169838	0.451534	5.23574	1.41	3.71329
Sq-AECH1_14	0.0935995	0.195015	0.039277	0.0370766	0.0983542	0.925302	12.1414	12.1414	1.62095	1.95911	29.2515	1.9	15.3955
Sq-AECH1_15	0.0289479	0.0580439	0.0114302	0.00894167	0.020096	0.169857	3.99894	3.99894	0.22279	0.387518	8.9055	1.26	7.06786
Sq-AECH1_16	0.0113526	0.0222672	0.00578934	0.0046174	0.011676	0.0384458	1.51107	1.51107	0.0758197	0.211575	3.40367	1.9	1.79141

## Sheet: 5D, Gene expression
		Acylsugar level	Sq-AACS1 relative gene expression			Acylsugar level	Sq-AECH1 relative gene expression
	VIGS_Sq-AACS1_01	9.33483	0.1016		VIGS_Sq-AECH1_01	22.973	0.6007
	VIGS_Sq-AACS1_02	11.4589	0.7954		VIGS_Sq-AECH1_02	9.0954	0.3812
	VIGS_Sq-AACS1_03	3.95619	0.1981		VIGS_Sq-AECH1_03	6.6707	0.2727
	VIGS_Sq-AACS1_04	17.9249	1.2891		VIGS_Sq-AECH1_04	8.6052	0.425
	VIGS_Sq-AACS1_05	1.09935	0.0719		VIGS_Sq-AECH1_05	10.301	1.2125
	VIGS_Sq-AACS1_06	10.4653	0.6176		VIGS_Sq-AECH1_06	15.235	1.2396
	VIGS_Sq-AACS1_07	14.9206	1.0185		VIGS_Sq-AECH1_07	5.6016	0.6505
	VIGS_Sq-AACS1_08	14.136	1.8192		VIGS_Sq-AECH1_08	12.862	0.2686
	VIGS_Sq-AACS1_09	5.48457	0.3667		VIGS_Sq-AECH1_09	4.2508	0.1587
	VIGS_Sq-AACS1_10	12.4454	0.4448		VIGS_Sq-AECH1_10	3.0088	0.4419
	VIGS_Sq-AACS1_11	3.41321	0.0492		VIGS_Sq-AECH1_11	3.4253	0.5331
	VIGS_Sq-AACS1_12	1.61351	0.1135		VIGS_Sq-AECH1_12	19.135	2.2559
	VIGS_Sq-AACS1_13	5.75588	0.4052		VIGS_Sq-AECH1_13	3.7133	0.6603
	VIGS_Sq-AACS1_14	18.8305	1.369		VIGS_Sq-AECH1_14	15.396	2.4871
	VIGS_Sq-AACS1_15	15.7092	0.574		VIGS_Sq-AECH1_15	7.0679	0.4839
	VIGS_Sq-AACS1_16	8.51772	0.1022		VIGS_Sq-AECH1_16	1.7914	0.5758

## Sheet: Raw Data for qRT-PCR
	Tested genes		1	2	3	4	5	6	7	8	9	10	11	12	13	14	15	16
Plant infiltrated with Empty Vector	EF-1a	Replicate1	20.6914	20.6148	20.6554	19.4163	19.9974	19.7838	19.7761	19.7142	21.4053	19.9661	19.987	20.9009	21.7832	19.7005	20.1943	21.5318
		Replicate2	20.9373	20.8655	20.7194	19.5819	20.3544	19.8448	19.7859	19.8663	21.1562	19.9509	19.931	20.9458	21.8377	19.6773	20.1949	21.6608
		Replicate3	20.8462	20.8201	20.65	19.4452	20.2161	19.6724	19.7158	19.7164	21.1582	20.1218	20.0044	20.9679	21.7739	19.6425	20.1811	21.3348
	Sq-AACS1	Replicate1	26.8493	25.3805	26.0259	25.2538	25.7782	25.243	25.4321	24.9316	25.9037	25.0616	25.6577	25.0459	25.8015	25.0461	24.9582	26.4624
		Replicate2	27.2362	25.3987	25.9943	25.2914	25.9124	25.5572	25.5183	25.2793	25.9637	24.9996	25.5873	25.1825	25.7888	25.0397	24.9724	26.3334
		Replicate3	27.3246	25.4091	26.2519	25.5323	26.2957	25.464	25.4183	24.9944	26.248	25.152	25.8694	25.1689	25.8504	25.0112	24.9635	26.3087
	Sq-AECH1	Replicate1	27.2108	25.8136	26.5424	25.9992	26.442	26.2774	26.0116	25.7496	26.2528	25.5438	25.9661	25.6255	26.2061	25.9082	25.4354	26.3982
		Replicate2	27.5225	25.7472	26.536	25.5927	26.524	26.0993	25.9118	24.8854	26.5029	25.9277	26.3509	26.093	26.8455	26.26	25.6433	27.4522
		Replicate3	27.349	25.9142	26.4757	25.783	26.5346	26.3216	26.1476	25.5396	26.4488	25.6602	26.5011	25.9312	26.438	26.0402	25.6042	27.0001
VIGS plants targeting Sq-AACS1	EF-1a	Replicate1	19.932	21.1321	20.1592	20.3751	19.4504	20.5325	20.3604	20.3701	20.0071	20.8233	19.1802	19.5049	25.5515	20.3823	20.374	20.3182
		Replicate2	19.8942	21.0826	20.324	20.3402	19.5094	20.5188	20.4755	20.44	20.2032	20.9433	18.9937	19.554	21.2221	20.4094	20.3059	20.1075
		Replicate3	20.1806	21.3654	20.3387	20.5101	19.5003	20.7105	20.4543	20.7788	20.0986	20.8463	18.9456	19.548	21.3224	20.4484	20.2653	20.1399
	Sq-AACS1	Replicate1	28.3129	26.779	27.8441	24.9516	28.5999	26.2499	25.506	24.585	26.4485	27.1898	28.7596	27.6279	28.8808	25.0447	26.092	28.9672
		Replicate2	28.8514	26.5925	27.8519	25.4868	28.8136	26.5638	25.7456	25.1413	26.8811	27.3503	28.5671	28.1905	29.6303	25.2869	26.4288	28.7168
		Replicate3	28.395	26.8528	27.7854	25.3413	28.0923	26.6872	25.6125	24.9261	26.9743	27.2322	28.4794	27.858	29.1479	25.2026	26.4803	28.4064
VIGS plants targeting Sq-AECH1	EF-1a	Replicate1	20.5605	20.4906	20.3441	20.0059	21.7877	20.3855	21.1809	20.539	19.238	20.741	20.5499	21.4735	20.8429	21.3205	20.3832	21.3948
		Replicate2	20.5586	20.5095	20.289	20.0873	21.6961	20.4208	21.3728	20.6005	19.2316	20.9605	20.5189	21.6755	20.7786	21.2642	20.366	21.4388
		Replicate3	20.632	20.6272	20.4105	20.1759	21.5468	20.5562	21.2718	20.6285	19.1028	20.9045	20.5494	21.6392	20.8025	21.2468	20.2795	21.368
	Sq-AECH1	Replicate1	27.3902	27.5208	27.6854	27.006	26.467	26.0569	27.4315	28.1179	27.5791	27.6217	27.5387	26.0927	27.0597	25.6672	26.9682	27.7135
		Replicate2	27.0634	27.5772	28.8324	27.1944	26.814	25.9701	27.7371	28.7341	27.6575	27.7587	26.9021	26.3012	27.2214	25.6619	27.3907	27.7702
		Replicate3	26.8327	28.0334	27.4785	27.1018	28.2452	25.7355	27.8474	27.9343	27.6332	28.0902	27.2295	26.2027	27.2689	25.8885	27.1408	28.4368
