# Supplementary material for: Evolution of a plant gene cluster in Solanaceae and emergence of metabolic diversity
Source: eLife. 2020 Jul 2;9:e56717. doi: 10.7554/eLife.56717 (PMC7386920; doi:10.7554/eLife.56717)
Supplement: Supplementary file 1. — The values of Pearson’s correlation coefficient of the expression profiles between any of the two genes were shown in the table. The coefficient values were generated using the FPKM values of these genes in the 372 RNA-seq samples as shown in Figure 2—figure supplement 1. The orange box highlights a group of co-expressed genes involved in acylsugar biosynthesis, such as Sl-ASATs, Sl-AACS1, and Sl-AECH1. The purple box points out another group of co-expressed genes that are root hair specific. [file elife-56717-supp1.xlsx]

## Sheet: Gene_coexpression_nor
	Supplementary File1. Co-expression analysis of tomato genes from ACS, ECH, and BAHD acyltransferase families used for phylogenetic analysis in this study. The values of Pearson’s correlation coefficient of the expression profiles between any of the two genes were shown in the table. The coefficient values were generated using the FPKM values of these genes in the 372 RNA-seq samples as shown in F…
		Solyc12g011160.2.1	Solyc02g082910.3.1	Solyc11g069680.1.1	Solyc05g039950.2.1	Solyc02g081360.3.1	Solyc06g008920.3.1	Solyc03g031870.2.1	Solyc11g067270.1.1	Solyc12g006330.1.1	Solyc07g043630.2.1	Solyc01g105580.1.1	Solyc04g012020.1.1	Solyc07g043660.3.1	Solyc07g043680.3.1	Solyc02g081350.3.1	Solyc02g081760.2.1	Solyc07g043640.3.1	Solyc07g043670.1.1	Solyc07g043710.3.1	Solyc11g067290.1.1	Solyc11g067330.1.1	Solyc07g044720.2.1	Solyc07g044730.3.1	Solyc06g054520.1.1	Solyc07g044710.2.1	Solyc07g043700.2.1	Solyc02g082870.3.1	Solyc02g082880.2.1	Solyc08g014490.1.1	Solyc02g081800.1.1	Solyc02g081360.3.1	Solyc01g108800.3.1	Solyc03g031940.3.1	Solyc01g090700.3.1	Solyc10g085630.2.1	Solyc03g032210.3.1	Solyc08g075210.2.1	Solyc12g099360.2.1	Solyc02g037495.1.1	Solyc02g037490.1.1	Solyc01g080930.3.1	Solyc08g075810.3.1	Solyc01g060180.3.1	Solyc08g075800.1.1
	Solyc12g011160.2.1	1	0.409136	0.350123	0.316981	0.0290601	0.299388	0.176442	-0.0135503	-0.015454	-0.0137567	-0.0174526	0.0315635	0.0197696	0.0269366	0.121649	-0.00462535	0.0776987	0.0743166	0.0791354	0.0758118	0.0781089	0.0600958	0.0602127	0.0640589	0.0697697	0.0900439	0.0768371	0.0328123	0.0646397	0.038	0.0290601	0.0835078	-0.0999048	0.0701729	0.0649002	0.0762581	0.0909187	0.0934543	0.0674354	-0.0700785	0.0353264	0.282263	-0.0846149	-0.034249
	Solyc02g082910.3.1	0.409136	1	0.403639	0.376472	-0.00443608	0.237378	0.302831	-0.0627498	-0.0471835	-0.0408083	-0.0413652	-0.0694332	-0.03384	-0.0203465	0.0701826	0.0019105	0.0552958	0.0557977	0.0593258	0.048249	0.0652249	0.0367126	0.0362514	0.0373594	0.039909	0.0615781	0.0631114	0.0300536	0.0660847	0.00259834	-0.00443608	-0.0417579	-0.126143	0.0443809	-0.0266694	-0.00297038	-0.0159691	-0.0417618	0.053747	-0.164409	0.0582767	0.155435	-0.0627047	-0.00775723
	Solyc11g069680.1.1	0.350123	0.403639	1	0.655107	-0.0332862	0.135995	0.215609	-0.0321254	-0.022842	-0.0370456	-0.0243169	-0.0477627	-0.0287495	-0.024016	0.111507	-0.021407	-0.0113701	-0.0107406	-0.0121451	-0.0105617	-0.00894214	-0.00748617	-0.00769979	-0.0073612	-0.00816606	-0.0127375	-0.0244811	-0.00288506	0.00132517	0.0468665	-0.0332862	-0.0178515	-0.0603774	-0.0780995	-0.12792	-0.0941552	-0.084982	-0.084331	0.0113001	-0.128356	0.000383017	0.0237761	0.0960155	-0.0175745
	Solyc05g039950.2.1	0.316981	0.376472	0.655107	1	0.127565	0.265381	0.152968	-0.0608838	-0.0513844	-0.0626837	-0.0487187	-0.0852716	-0.0295519	-0.0309174	0.0578492	-0.0366339	-0.0398321	-0.0386476	-0.0436037	-0.0339276	-0.0427811	-0.0270832	-0.0264457	-0.0278265	-0.0316179	-0.0455085	-0.056482	-0.0626919	-0.0574685	-0.0321634	0.127565	-0.0725337	-0.0298076	-0.029817	0.14071	-0.0188139	-0.116	-0.103778	-0.0256949	0.136213	-0.0959038	0.100853	-0.161646	-0.0296362
	Solyc02g081360.3.1	0.0290601	-0.00443608	-0.0332862	0.127565	1	0.0495605	-0.0530062	-0.0431995	-0.0349941	-0.0459087	-0.0372457	-0.0511206	-0.0271895	-0.0265861	-0.0241086	0.204119	0.169063	0.16736	0.16435	0.165228	0.174234	0.162858	0.161568	0.165236	0.166007	0.160036	0.137821	0.0584788	0.0755363	0.0977895	1	-0.0420558	-0.0287023	0.0540473	0.253596	0.147188	0.073446	-0.0691185	-0.0771149	0.245729	-0.063579	0.143961	-0.162258	-0.02056
	Solyc06g008920.3.1	0.299388	0.237378	0.135995	0.265381	0.0495605	1	0.155058	-0.061731	-0.0416861	-0.0529725	-0.0291823	-0.0908601	-0.0604798	-0.0506411	0.0479248	-0.0497394	-0.0498816	-0.048285	-0.0530688	-0.0438673	-0.0570534	-0.0336558	-0.0330281	-0.0341854	-0.0352594	-0.0521149	-0.0959494	-0.0880212	-0.0776705	0.0112536	0.0495605	-0.0637477	-0.122873	0.14379	-0.0925653	-0.142471	-0.0798311	0.114477	0.347014	-0.104669	0.258137	0.205831	-0.041952	-0.00636956
	Solyc03g031870.2.1	0.176442	0.302831	0.215609	0.152968	-0.0530062	0.155058	1	-0.0400355	0.015135	-0.0552368	0.132035	-0.049706	-0.0438981	-0.0247465	0.0932258	-0.0334673	-0.00252941	-0.0133741	-0.00465856	-0.0187619	-0.00135737	-0.0175501	-0.0178691	-0.0189728	-0.0181622	-0.0167152	0.00497726	0.100512	0.17472	-0.0671485	-0.0530062	-0.00712018	0.0142875	-0.104646	-0.0607581	0.0679417	-0.121158	-0.122835	-0.0181248	-0.150077	0.0215219	0.0577651	0.102102	-0.0274756
Sl-ASAT3	Solyc11g067270.1.1	-0.0135503	-0.0627498	-0.0321254	-0.0608838	-0.0431995	-0.061731	-0.0400355	1	0.953082	0.91813	0.873352	0.839172	0.563472	0.555454	-0.0168931	-0.0163122	-0.0204036	-0.0189336	-0.021065	-0.0175516	-0.023553	-0.0135843	-0.0132078	-0.0136985	-0.0143164	-0.0202377	0.354343	0.320142	-0.033619	-0.0129994	-0.0431995	-0.0159961	0.348478	-0.00607469	-0.0568963	0.172673	-0.0502358	-0.0809748	-0.0433421	0.125581	0.0280107	-0.0421067	-0.0254169	-0.0197512
Sl-ASAT1	Solyc12g006330.1.1	-0.015454	-0.0471835	-0.022842	-0.0513844	-0.0349941	-0.0416861	0.015135	0.953082	1	0.91965	0.945373	0.838508	0.540676	0.537757	-0.0182608	-0.0176388	-0.0148596	-0.0136927	-0.0153963	-0.0128065	-0.0171854	-0.00991176	-0.00963707	-0.00999955	-0.0104459	-0.0147298	0.348419	0.357442	-0.0246329	-0.0152509	-0.0349941	-0.00962394	0.34431	-0.0193536	-0.0804051	0.144516	-0.0663877	-0.0693316	-0.0244666	0.0509669	-0.00978662	-0.048393	-0.0158199	-0.0144809
Sl-AACS1	Solyc07g043630.2.1	-0.0137567	-0.0408083	-0.0370456	-0.0626837	-0.0459087	-0.0529725	-0.0552368	0.91813	0.91965	1	0.841288	0.780156	0.703388	0.653006	0.111076	-0.0236838	-0.0229838	-0.0217035	-0.0240679	-0.0200198	-0.026712	-0.0154946	-0.0150652	-0.0152696	-0.0163297	-0.0225462	0.318829	0.313803	-0.0381413	0.00379933	-0.0459087	-0.0278842	0.330456	0.1129	-0.0858621	0.137391	-0.0683837	-0.0607227	0.00573698	0.0644871	0.0239792	-0.0104284	-0.0429771	0.0799902
Sl-ASAT4	Solyc01g105580.1.1	-0.0174526	-0.0413652	-0.0243169	-0.0487187	-0.0372457	-0.0291823	0.132035	0.873352	0.945373	0.841288	1	0.776519	0.491546	0.495579	-0.0203283	-0.0182994	-0.0154239	-0.0142704	-0.0159729	-0.0132861	-0.0174883	-0.010283	-0.009998	-0.010374	-0.0108371	-0.0153098	0.311314	0.33594	-0.0255548	-0.0187005	-0.0372457	0.0121848	0.359629	-0.0322068	-0.0734802	0.135843	-0.0688119	-0.0717015	-0.0295448	0.0592797	-0.0172481	-0.0464462	-0.017933	-0.0150232
Sl-ASAT2	Solyc04g012020.1.1	0.0315635	-0.0694332	-0.0477627	-0.0852716	-0.0511206	-0.0908601	-0.049706	0.839172	0.838508	0.780156	0.776519	1	0.459429	0.458328	-0.038655	-0.00622966	-0.0263769	-0.0247008	-0.0271348	-0.0226922	-0.0304514	-0.017563	-0.0170763	-0.0177185	-0.0185095	-0.0262701	0.287668	0.277451	-0.0414365	-0.0304118	-0.0511206	0.450626	0.253005	0.0534917	0.066244	0.171614	0.249193	-0.0174049	-0.0574269	0.160318	0.124062	0.0428236	-0.117058	-0.0191185
	Solyc07g043660.3.1	0.0197696	-0.03384	-0.0287495	-0.0295519	-0.0271895	-0.0604798	-0.0438981	0.563472	0.540676	0.703388	0.491546	0.459429	1	0.907403	0.562715	-0.0187964	-0.0156658	-0.0146416	-0.0161838	-0.0134883	-0.0180854	-0.0105249	-0.0102368	-0.0104394	-0.0110259	-0.0126622	0.210523	0.166938	-0.0259688	0.0302696	-0.0271895	-0.00744166	0.160817	0.219766	-0.0684452	0.161921	-0.0315048	-0.054919	0.0025687	0.0292917	0.072848	0.0624677	-0.0670301	-0.0115838
Sl-AECH1	Solyc07g043680.3.1	0.0269366	-0.0203465	-0.024016	-0.0309174	-0.0265861	-0.0506411	-0.0247465	0.555454	0.537757	0.653006	0.495579	0.458328	0.907403	1	0.730827	-0.0149363	-0.00650264	-0.00558586	-0.00709615	-0.00472637	-0.00861255	-0.00209919	-0.0018688	-0.00218664	-0.00260085	-0.00208294	0.229914	0.163293	-0.0202716	0.0345221	-0.0265861	0.00495791	0.111539	0.164777	-0.0496435	0.155603	-0.0196761	-0.0452159	0.0031933	0.0166837	0.0906352	0.0440122	-0.0638004	-0.011977
	Solyc02g081350.3.1	0.121649	0.0701826	0.111507	0.0578492	-0.0241086	0.0479248	0.0932258	-0.0168931	-0.0182608	0.111076	-0.0203283	-0.038655	0.562715	0.730827	1	-0.0107161	-0.0204879	-0.0197508	-0.0212222	-0.0184457	-0.0224466	-0.0138192	-0.0142757	-0.0146544	-0.0152964	-0.0149069	-0.0291352	-0.0244368	-0.0182036	0.0269442	-0.0241086	0.00270369	-0.0213741	0.0989218	-0.0849475	0.0224997	-0.0149324	-0.0540351	0.00386951	-0.0702271	0.0882664	0.0455821	-0.0166166	0.0182172
	Solyc02g081760.2.1	-0.00462535	0.0019105	-0.021407	-0.0366339	0.204119	-0.0497394	-0.0334673	-0.0163122	-0.0176388	-0.0236838	-0.0182994	-0.00622966	-0.0187964	-0.0149363	-0.0107161	1	-0.0100868	-0.00959806	-0.0104123	-0.00866428	-0.0116269	-0.00670586	-0.00652002	-0.00676525	-0.00706725	-0.0090714	0.0154416	-0.0219969	-0.00690023	0.0586802	0.204119	-0.0128854	0.0234865	0.130774	0.130681	0.0467048	0.207722	0.0356191	-0.0306817	-0.0217428	0.137344	0.0459164	-0.100598	-0.000567917
	Solyc07g043640.3.1	0.0776987	0.0552958	-0.0113701	-0.0398321	0.169063	-0.0498816	-0.00252941	-0.0204036	-0.0148596	-0.0229838	-0.0154239	-0.0263769	-0.0156658	-0.00650264	-0.0204879	-0.0100868	1	0.996704	0.99297	0.995784	0.985931	0.975911	0.976136	0.980449	0.986186	0.962178	0.740062	0.140361	0.188492	0.03255	0.169063	-0.0128323	-0.062667	-0.0332699	0.0429779	0.224991	-0.0408443	-0.0320878	-0.0169389	-0.067049	-0.0921826	0.0180021	0.034412	-0.0053553
	Solyc07g043670.1.1	0.0743166	0.0557977	-0.0107406	-0.0386476	0.16736	-0.048285	-0.0133741	-0.0189336	-0.0136927	-0.0217035	-0.0142704	-0.0247008	-0.0146416	-0.00558586	-0.0197508	-0.00959806	0.996704	1	0.993114	0.991709	0.991527	0.977037	0.976852	0.978886	0.981881	0.956042	0.748992	0.13819	0.175148	0.0298523	0.16736	-0.0119839	-0.0592411	-0.0339802	0.0409458	0.2027	-0.0386836	-0.0310241	-0.0158086	-0.0639592	-0.0916504	0.0196262	0.0348441	-0.00562609
	Solyc07g043710.3.1	0.0791354	0.0593258	-0.0121451	-0.0436037	0.16435	-0.0530688	-0.00465856	-0.021065	-0.0153963	-0.0240679	-0.0159729	-0.0271348	-0.0161838	-0.00709615	-0.0212222	-0.0104123	0.99297	0.993114	1	0.98939	0.983329	0.954798	0.956098	0.960682	0.970972	0.982002	0.74702	0.137637	0.19243	0.0246591	0.16435	-0.0120061	-0.0647021	-0.0373708	0.0448062	0.215243	-0.0418851	-0.0335374	-0.0193335	-0.0692444	-0.0934668	0.0181119	0.0310421	-0.00483568
	Solyc11g067290.1.1	0.0758118	0.048249	-0.0105617	-0.0339276	0.165228	-0.0438673	-0.0187619	-0.0175516	-0.0128065	-0.0200198	-0.0132861	-0.0226922	-0.0134883	-0.00472637	-0.0184457	-0.00866428	0.995784	0.991709	0.98939	1	0.97237	0.98041	0.98197	0.986357	0.992972	0.964401	0.705721	0.10569	0.148878	0.00393339	0.165228	-0.0100881	-0.0561365	-0.0377491	0.0390746	0.188002	-0.0352908	-0.0286677	-0.014236	-0.0579697	-0.0919016	0.0133798	0.0347516	-0.00387616
	Solyc11g067330.1.1	0.0781089	0.0652249	-0.00894214	-0.0427811	0.174234	-0.0570534	-0.00135737	-0.023553	-0.0171854	-0.026712	-0.0174883	-0.0304514	-0.0180854	-0.00861255	-0.0224466	-0.0116269	0.985931	0.991527	0.983329	0.97237	1	0.954451	0.952415	0.954861	0.955903	0.940777	0.791462	0.215336	0.253055	0.0921214	0.174234	-0.0156232	-0.0668407	-0.0274299	0.0671541	0.226779	-0.0463511	-0.0365694	-0.0203304	-0.0774488	-0.0876717	0.0244538	0.0302961	-0.00756452
	Solyc07g044720.2.1	0.0600958	0.0367126	-0.00748617	-0.0270832	0.162858	-0.0336558	-0.0175501	-0.0135843	-0.00991176	-0.0154946	-0.010283	-0.017563	-0.0105249	-0.00209919	-0.0138192	-0.00670586	0.975911	0.977037	0.954798	0.98041	0.954451	1	0.999701	0.998786	0.992705	0.898164	0.66222	0.0841409	0.0994105	-0.00234264	0.162858	-0.00833087	-0.0450916	-0.0335212	0.0131743	0.137562	-0.0274897	-0.0235398	-0.00727189	-0.0450392	-0.0899742	0.00722297	0.0425956	-0.00497408
	Solyc07g044730.3.1	0.0602127	0.0362514	-0.00769979	-0.0264457	0.161568	-0.0330281	-0.0178691	-0.0132078	-0.00963707	-0.0150652	-0.009998	-0.0170763	-0.0102368	-0.0018688	-0.0142757	-0.00652002	0.976136	0.976852	0.956098	0.98197	0.952415	0.999701	1	0.999082	0.993776	0.901819	0.658291	0.0769954	0.0925284	-0.0105851	0.161568	-0.00786701	-0.0444692	-0.0343889	0.013652	0.135322	-0.0268131	-0.0230183	-0.00693692	-0.0437717	-0.0903752	0.00725258	0.0419219	-0.00466427
	Solyc06g054520.1.1	0.0640589	0.0373594	-0.0073612	-0.0278265	0.165236	-0.0341854	-0.0189728	-0.0136985	-0.00999955	-0.0152696	-0.010374	-0.0177185	-0.0104394	-0.00218664	-0.0146544	-0.00676525	0.980449	0.978886	0.960682	0.986357	0.954861	0.998786	0.999082	1	0.997067	0.911974	0.658018	0.0849388	0.105597	0.00091455	0.165236	-0.00812151	-0.0456606	-0.0345519	0.0111171	0.144759	-0.0278253	-0.0235935	-0.00756973	-0.0452275	-0.0902825	0.00667825	0.0414625	-0.00434895
	Solyc07g044710.2.1	0.0697697	0.039909	-0.00816606	-0.0316179	0.166007	-0.0352594	-0.0181622	-0.0143164	-0.0104459	-0.0163297	-0.0108371	-0.0185095	-0.0110259	-0.00260085	-0.0152964	-0.00706725	0.986186	0.981881	0.970972	0.992972	0.955903	0.992705	0.993776	0.997067	1	0.935432	0.654537	0.0858853	0.117139	-0.00313503	0.166007	-0.00806002	-0.0479313	-0.0378151	0.00141031	0.159693	-0.0291592	-0.0243205	-0.00887821	-0.0475064	-0.0920148	0.00636652	0.0419026	-0.00351986
	Solyc07g043700.2.1	0.0900439	0.0615781	-0.0127375	-0.0455085	0.160036	-0.0521149	-0.0167152	-0.0202377	-0.0147298	-0.0225462	-0.0153098	-0.0262701	-0.0126622	-0.00208294	-0.0149069	-0.0090714	0.962178	0.956042	0.982002	0.964401	0.940777	0.898164	0.901819	0.911974	0.935432	1	0.706885	0.114223	0.188102	0.0144945	0.160036	-0.0102421	-0.0640013	-0.0417506	0.0381745	0.224473	-0.040416	-0.0323482	-0.0205813	-0.0670879	-0.0902623	0.0185799	0.0229853	-0.00198703
	Solyc02g082870.3.1	0.0768371	0.0631114	-0.0244811	-0.056482	0.137821	-0.0959494	0.00497726	0.354343	0.348419	0.318829	0.311314	0.287668	0.210523	0.229914	-0.0291352	0.0154416	0.740062	0.748992	0.74702	0.705721	0.791462	0.66222	0.658291	0.658018	0.654537	0.706885	1	0.369605	0.303981	0.157176	0.137821	-0.0231996	0.0118302	0.0211347	0.221831	0.390418	-0.023037	-0.0706421	-0.0409606	-0.0561575	-0.018118	0.0799772	-0.0235304	-0.0184276
	Solyc02g082880.2.1	0.0328123	0.0300536	-0.00288506	-0.0626919	0.0584788	-0.0880212	0.100512	0.320142	0.357442	0.313803	0.33594	0.277451	0.166938	0.163293	-0.0244368	-0.0219969	0.140361	0.13819	0.137637	0.10569	0.215336	0.0841409	0.0769954	0.0849388	0.0858853	0.114223	0.369605	1	0.880671	0.342795	0.0584788	-0.034177	0.111295	0.00140691	0.0495612	0.236419	-0.0824763	-0.0712294	-0.0488831	-0.0695128	-0.034284	-0.0282476	-0.0219461	-0.0192318
	Solyc08g014490.1.1	0.0646397	0.0660847	0.00132517	-0.0574685	0.0755363	-0.0776705	0.17472	-0.033619	-0.0246329	-0.0381413	-0.0255548	-0.0414365	-0.0259688	-0.0202716	-0.0182036	-0.00690023	0.188492	0.175148	0.19243	0.148878	0.253055	0.0994105	0.0925284	0.105597	0.117139	0.188102	0.303981	0.880671	1	0.344574	0.0755363	-0.0288033	-0.0757061	0.0279626	0.106944	0.275772	-0.0491223	-0.0401576	-0.0362872	-0.108077	-0.00379613	0.0217843	-0.0219384	-0.0110175
	Solyc02g081800.1.1	0.038	0.00259834	0.0468665	-0.0321634	0.0977895	0.0112536	-0.0671485	-0.0129994	-0.0152509	0.00379933	-0.0187005	-0.0304118	0.0302696	0.0345221	0.0269442	0.0586802	0.03255	0.0298523	0.0246591	0.00393339	0.0921214	-0.00234264	-0.0105851	0.00091455	-0.00313503	0.0144945	0.157176	0.342795	0.344574	1	0.0977895	0.00262338	-0.0390326	0.292371	0.0886701	0.0464163	0.0666407	0.148926	0.209845	-0.0339834	0.206426	0.178517	-0.118478	-0.0124866
	Solyc02g081360.3.1	0.0290601	-0.00443608	-0.0332862	0.127565	1	0.0495605	-0.0530062	-0.0431995	-0.0349941	-0.0459087	-0.0372457	-0.0511206	-0.0271895	-0.0265861	-0.0241086	0.204119	0.169063	0.16736	0.16435	0.165228	0.174234	0.162858	0.161568	0.165236	0.166007	0.160036	0.137821	0.0584788	0.0755363	0.0977895	1	-0.0420558	-0.0287023	0.0540473	0.253596	0.147188	0.073446	-0.0691185	-0.0771149	0.245729	-0.063579	0.143961	-0.162258	-0.02056
	Solyc01g108800.3.1	0.0835078	-0.0417579	-0.0178515	-0.0725337	-0.0420558	-0.0637477	-0.00712018	-0.0159961	-0.00962394	-0.0278842	0.0121848	0.450626	-0.00744166	0.00495791	0.00270369	-0.0128854	-0.0128323	-0.0119839	-0.0120061	-0.0100881	-0.0156232	-0.00833087	-0.00786701	-0.00812151	-0.00806002	-0.0102421	-0.0231996	-0.034177	-0.0288033	0.00262338	-0.0420558	1	-0.027156	0.0722552	0.199231	0.00103934	0.504245	0.022556	-0.0474329	0.203992	0.128507	0.112917	-0.131928	-0.0169477
	Solyc03g031940.3.1	-0.0999048	-0.126143	-0.0603774	-0.0298076	-0.0287023	-0.122873	0.0142875	0.348478	0.34431	0.330456	0.359629	0.253005	0.160817	0.111539	-0.0213741	0.0234865	-0.062667	-0.0592411	-0.0647021	-0.0561365	-0.0668407	-0.0450916	-0.0444692	-0.0456606	-0.0479313	-0.0640013	0.0118302	0.111295	-0.0757061	-0.0390326	-0.0287023	-0.027156	1	-0.138111	0.0564542	0.182528	-0.0823818	-0.298773	-0.249938	0.394386	-0.167888	-0.0643859	-0.116861	-0.0626192
	Solyc01g090700.3.1	0.0701729	0.0443809	-0.0780995	-0.029817	0.0540473	0.14379	-0.104646	-0.00607469	-0.0193536	0.1129	-0.0322068	0.0534917	0.219766	0.164777	0.0989218	0.130774	-0.0332699	-0.0339802	-0.0373708	-0.0377491	-0.0274299	-0.0335212	-0.0343889	-0.0345519	-0.0378151	-0.0417506	0.0211347	0.00140691	0.0279626	0.292371	0.0540473	0.0722552	-0.138111	1	0.31111	0.0791274	0.306106	0.597249	0.611348	-0.0345125	0.633664	0.590876	-0.469795	0.116191
	Solyc10g085630.2.1	0.0649002	-0.0266694	-0.12792	0.14071	0.253596	-0.0925653	-0.0607581	-0.0568963	-0.0804051	-0.0858621	-0.0734802	0.066244	-0.0684452	-0.0496435	-0.0849475	0.130681	0.0429779	0.0409458	0.0448062	0.0390746	0.0671541	0.0131743	0.013652	0.0111171	0.00141031	0.0381745	0.221831	0.0495612	0.106944	0.0886701	0.253596	0.199231	0.0564542	0.31111	1	0.327076	0.386737	0.103495	-0.0205161	0.445315	0.0934785	0.418029	-0.587283	0.00912423
	Solyc03g032210.3.1	0.0762581	-0.00297038	-0.0941552	-0.0188139	0.147188	-0.142471	0.0679417	0.172673	0.144516	0.137391	0.135843	0.171614	0.161921	0.155603	0.0224997	0.0467048	0.224991	0.2027	0.215243	0.188002	0.226779	0.137562	0.135322	0.144759	0.159693	0.224473	0.390418	0.236419	0.275772	0.0464163	0.147188	0.00103934	0.182528	0.0791274	0.327076	1	0.0455798	-0.159841	-0.205083	0.238709	-0.0353926	0.214617	-0.243383	-0.0237293
	Solyc08g075210.2.1	0.0909187	-0.0159691	-0.084982	-0.116	0.073446	-0.0798311	-0.121158	-0.0502358	-0.0663877	-0.0683837	-0.0688119	0.249193	-0.0315048	-0.0196761	-0.0149324	0.207722	-0.0408443	-0.0386836	-0.0418851	-0.0352908	-0.0463511	-0.0274897	-0.0268131	-0.0278253	-0.0291592	-0.040416	-0.023037	-0.0824763	-0.0491223	0.0666407	0.073446	0.504245	-0.0823818	0.306106	0.386737	0.0455798	1	0.211343	0.0587658	0.189809	0.30395	0.31623	-0.33204	0.027952
	Solyc12g099360.2.1	0.0934543	-0.0417618	-0.084331	-0.103778	-0.0691185	0.114477	-0.122835	-0.0809748	-0.0693316	-0.0607227	-0.0717015	-0.0174049	-0.054919	-0.0452159	-0.0540351	0.0356191	-0.0320878	-0.0310241	-0.0335374	-0.0286677	-0.0365694	-0.0235398	-0.0230183	-0.0235935	-0.0243205	-0.0323482	-0.0706421	-0.0712294	-0.0401576	0.148926	-0.0691185	0.022556	-0.298773	0.597249	0.103495	-0.159841	0.211343	1	0.772649	-0.235453	0.531793	0.524137	-0.356595	0.104645
	Solyc02g037495.1.1	0.0674354	0.053747	0.0113001	-0.0256949	-0.0771149	0.347014	-0.0181248	-0.0433421	-0.0244666	0.00573698	-0.0295448	-0.0574269	0.0025687	0.0031933	0.00386951	-0.0306817	-0.0169389	-0.0158086	-0.0193335	-0.014236	-0.0203304	-0.00727189	-0.00693692	-0.00756973	-0.00887821	-0.0205813	-0.0409606	-0.0488831	-0.0362872	0.209845	-0.0771149	-0.0474329	-0.249938	0.611348	-0.0205161	-0.205083	0.0587658	0.772649	1	-0.251566	0.572157	0.519071	-0.277504	0.0798322
	Solyc02g037490.1.1	-0.0700785	-0.164409	-0.128356	0.136213	0.245729	-0.104669	-0.150077	0.125581	0.0509669	0.0644871	0.0592797	0.160318	0.0292917	0.0166837	-0.0702271	-0.0217428	-0.067049	-0.0639592	-0.0692444	-0.0579697	-0.0774488	-0.0450392	-0.0437717	-0.0452275	-0.0475064	-0.0670879	-0.0561575	-0.0695128	-0.108077	-0.0339834	0.245729	0.203992	0.394386	-0.0345125	0.445315	0.238709	0.189809	-0.235453	-0.251566	1	-0.22065	0.0937336	-0.348752	-0.0637709
	Solyc01g080930.3.1	0.0353264	0.0582767	0.000383017	-0.0959038	-0.063579	0.258137	0.0215219	0.0280107	-0.00978662	0.0239792	-0.0172481	0.124062	0.072848	0.0906352	0.0882664	0.137344	-0.0921826	-0.0916504	-0.0934668	-0.0919016	-0.0876717	-0.0899742	-0.0903752	-0.0902825	-0.0920148	-0.0902623	-0.018118	-0.034284	-0.00379613	0.206426	-0.063579	0.128507	-0.167888	0.633664	0.0934785	-0.0353926	0.30395	0.531793	0.572157	-0.22065	1	0.464547	-0.170419	0.0566799
	Solyc08g075810.3.1	0.282263	0.155435	0.0237761	0.100853	0.143961	0.205831	0.0577651	-0.0421067	-0.048393	-0.0104284	-0.0464462	0.0428236	0.0624677	0.0440122	0.0455821	0.0459164	0.0180021	0.0196262	0.0181119	0.0133798	0.0244538	0.00722297	0.00725258	0.00667825	0.00636652	0.0185799	0.0799772	-0.0282476	0.0217843	0.178517	0.143961	0.112917	-0.0643859	0.590876	0.418029	0.214617	0.31623	0.524137	0.519071	0.0937336	0.464547	1	-0.486595	0.032571
	Solyc01g060180.3.1	-0.0846149	-0.0627047	0.0960155	-0.161646	-0.162258	-0.041952	0.102102	-0.0254169	-0.0158199	-0.0429771	-0.017933	-0.117058	-0.0670301	-0.0638004	-0.0166166	-0.100598	0.034412	0.0348441	0.0310421	0.0347516	0.0302961	0.0425956	0.0419219	0.0414625	0.0419026	0.0229853	-0.0235304	-0.0219461	-0.0219384	-0.118478	-0.162258	-0.131928	-0.116861	-0.469795	-0.587283	-0.243383	-0.33204	-0.356595	-0.277504	-0.348752	-0.170419	-0.486595	1	-0.0802768
	Solyc08g075800.1.1	-0.034249	-0.00775723	-0.0175745	-0.0296362	-0.02056	-0.00636956	-0.0274756	-0.0197512	-0.0144809	0.0799902	-0.0150232	-0.0191185	-0.0115838	-0.011977	0.0182172	-0.000567917	-0.0053553	-0.00562609	-0.00483568	-0.00387616	-0.00756452	-0.00497408	-0.00466427	-0.00434895	-0.00351986	-0.00198703	-0.0184276	-0.0192318	-0.0110175	-0.0124866	-0.02056	-0.0169477	-0.0626192	0.116191	0.00912423	-0.0237293	0.027952	0.104645	0.0798322	-0.0637709	0.0566799	0.032571	-0.0802768	1
