# Supplementary material for: Evolution of a plant gene cluster in Solanaceae and emergence of metabolic diversity
Source: eLife. 2020 Jul 2;9:e56717. doi: 10.7554/eLife.56717 (PMC7386920; doi:10.7554/eLife.56717)
Supplement: Supplementary file 2. — logFC: log2 fold change in stem trichomes versus shaved stems. logCPM: log (counts per million) in trichomes versus shaved stems. The F and Q-value test the significance of differential expression via a quasi- general linear model. The values noted in the sample columns represent the FPKM (Fragments Per Kilobase of transcript per Million mapped reads) analyzed via Cufflinks. [file elife-56717-supp2.xlsx]

## Sheet: Sheet1
Supplementary file2. Gene expression levels of all analyzed transcripts in Solanum pennellii LA0716. logFC: log2 fold change in stem trichomes versus shaved stems. logCPM: log (counts per million) in trichomes versus shaved stems. The F and Q-value test the significance of differential expression via a quasi- general linear model. The values noted in the sample columns represent the FPKM (Fragmen…
Gene	logFC	logCPM	F	PValue	Trichome1	Trichome2	Shaved stem1	Shaved stem2
Sopen00g001010	4.94223	-3.52614	2.59539	0.107178	0	0	0	0
Sopen00g001020	4.54796	-3.71512	2.01672	0.155579	0	0	0	0
Sopen00g001030	1.38737	2.46981	28.3906	9.93858e-08	3.42224	2.31772	1.4217	0.850273
Sopen00g001040	1.9839	2.42008	53.5379	2.5575e-13	3.17499	2.66338	1.00868	0.535588
Sopen00g001050	0.78135	0.935901	3.485	0.0619307	0.53812	0.511706	0.251055	0.272816
Sopen00g001060	3.77711	-1.58969	8.57856	0.00340229	0.322403	0.272533	0.029772	0.050223
Sopen00g001070	2.27774	-0.68014	8.26259	0.00404799	0.972449	1.09547	0.499946	0
Sopen00g001080	-2.39938	-4.34867	0.455869	0.499563	0	0	0.09611	0
Sopen00g001090	-2.39938	-4.34867	0.455869	0.499563	0	0	0	0
Sopen00g001100	-2.41024	-4.3438	0.45798	0.498571	0	0	0	0
Sopen00g001110	3.08949	-4.19448	0.73345	0.391769	0	0.02682	0	0
Sopen00g001120	0	-4.51725	0	1	0	0	0	0
Sopen00g001130	-2.39938	-4.34867	0.455869	0.499563	0	0	0	0
Sopen00g001140	0	-4.51725	0	1	0	0	0	0
Sopen00g001150	0	-4.51725	0	1	0	0	0	0
Sopen00g001160	0	-4.51725	0	1	0	0	0	0
Sopen00g001170	0	-4.51725	0	1	0	0	0	0
Sopen00g001180	0.215063	-3.05904	0.0191355	0.889979	0	0	0	0
Sopen00g001190	0	-4.51725	0	1	0	0	0	0
Sopen00g001200	0	-4.51725	0	1	0	0	0	0
Sopen00g001210	0	-4.51725	0	1	0	0	0	0
Sopen00g001220	0	-4.51725	0	1	0	0	0	0
Sopen00g001230	0	-4.51725	0	1	0	0	0	0
Sopen00g001240	0	-4.51725	0	1	0	0	0	0
Sopen00g001250	0	-4.51725	0	1	0	0	0	0
Sopen00g001260	0	-4.51725	0	1	0	0	0	0
Sopen00g001270	0	-4.51725	0	1	0	0	0	0
Sopen00g001280	0	-4.51725	0	1	0	0	0	0
Sopen00g001290	3.08638	-4.19606	0.732433	0.392098	0	0	0	0
Sopen00g001300	0	-4.51725	0	1	0	0	0	0
Sopen00g001310	0	-4.51725	0	1	0	0	0	0
Sopen00g001320	0	-4.51725	0	1	0	0	0	0
Sopen00g001330	0	-4.51725	0	1	0	0	0	0
Sopen00g001340	0	-4.51725	0	1	0	0	0	0
Sopen00g001350	0	-4.51725	0	1	0	0	0	0
Sopen00g001360	0	-4.51725	0	1	0	0	0	0
Sopen00g001370	2.2453	-4.34849	0.375425	0.540063	0	0	0	0
Sopen00g001380	0	-4.51725	0	1	0	0	0	0
Sopen00g001390	0	-4.51725	0	1	0	0	0	0
Sopen00g001400	0	-4.51725	0	1	0	0	0	0
Sopen00g001410	-2.39938	-4.34867	0.455869	0.499563	0	0	0	0
Sopen00g001420	0	-4.51725	0	1	0	0	0	0
Sopen00g001430	0.380172	-3.00472	0.0624215	0.802709	0	0	0	0
Sopen00g001440	0	-4.51725	0	1	0	0	0	0
Sopen00g001450	0	-4.51725	0	1	0	0	0	0
Sopen00g001460	0	-4.51725	0	1	0	0	0	0
Sopen00g001470	0	-4.51725	0	1	0	0	0	0
Sopen00g001480	0	-4.51725	0	1	0	0	0	0
Sopen00g001490	-0.187254	-3.92609	0.00578665	0.939364	0	0.008005	0	0.011699
Sopen00g001500	0	-4.51725	0	1	0	0	0	0
Sopen00g001510	0	-4.51725	0	1	0	0	0	0
Sopen00g001520	0	-4.51725	0	1	0	0	0	0
Sopen00g001530	0	-4.51725	0	1	0	0	0	0
Sopen00g001540	0	-4.51725	0	1	0	0	0	0
Sopen00g001550	0	-4.51725	0	1	0	0	0	0
Sopen00g001560	0	-4.51725	0	1	0	0	0	0
Sopen00g001570	0	-4.51725	0	1	0	0	0	0
Sopen00g001580	0	-4.51725	0	1	0	0	0	0
Sopen00g001590	0	-4.51725	0	1	0	0	0	0
Sopen00g001600	0	-4.51725	0	1	0	0	0	0
Sopen00g001610	-2.41024	-4.3438	0.45798	0.498571	0	0	0	0
Sopen00g001620	0	-4.51725	0	1	0	0	0	0
Sopen00g001630	0	-4.51725	0	1	0	0	0	0
Sopen00g001640	0	-4.51725	0	1	0	0	0	0
Sopen00g001650	2.24845	-4.3469	0.375956	0.539777	0	0	0	0
Sopen00g001660	0	-4.51725	0	1	0	0	0	0
Sopen00g001670	0	-4.51725	0	1	0	0	0	0
Sopen00g001680	4.29551	-3.82247	1.71058	0.190913	0	0	0	0
Sopen00g001690	0	-4.51725	0	1	0	0	0	0
Sopen00g001700	6.49901	-2.53078	6.65244	0.00990358	0	0.017105	0	0
Sopen00g001710	-0.15408	-4.19781	0.00260119	0.959324	0	0	0	0
Sopen00g001720	0.890211	-2.48561	0.480081	0.488387	0	0.047248	0	0
Sopen00g001730	0	-4.51725	0	1	0	0	0	0
Sopen00g001740	0	-4.51725	0	1	0	0	0	0
Sopen00g001750	0	-4.51725	0	1	0	0	0	0
Sopen00g001760	3.60911	-4.06126	1.07105	0.300711	0	0	0	0
Sopen00g001770	0.2223	-3.06498	0.0204174	0.886378	0	0.0801	0.068247	0.120327
Sopen00g001780	0.352328	-3.815	0.0238439	0.877283	0	0	0	0.034782
Sopen00g001790	0.683903	-4.06144	0.0618856	0.803541	0	0	0	0
Sopen00g001800	1.58579	-3.81637	0.413372	0.520265	0	0	0	0
Sopen00g001810	0	-4.51725	0	1	0	0	0	0
Sopen00g001820	2.65508	-2.82736	2.36709	0.123922	0	0.012676	0	0
Sopen00g001830	-2.39938	-4.34867	0.455869	0.499563	0	0	0	0
Sopen00g001840	4.21421	-2.40311	5.4703	0.0193445	0.124043	0.105735	0	0
Sopen00g001850	2.3609	-3.52481	1.09851	0.294597	0	0.024666	0	0
Sopen00g001860	0	-4.51725	0	1	0	0	0	0
Sopen00g001870	1.18466	-2.60861	0.739092	0.389954	0	0.06143	0.051657	0.091244
Sopen00g001880	0	-4.51725	0	1	0	0	0	0
Sopen00g001890	0	-4.51725	0	1	0	0	0	0
Sopen00g001900	0	-4.51725	0	1	0	0	0	0
Sopen00g001910	0	-4.51725	0	1	0	0	0	0
Sopen00g001920	2.67228	-2.10557	3.98568	0.0458916	0	0	0	0
Sopen00g001930	0	-4.51725	0	1	0	0	0	0
Sopen00g001940	0	-4.51725	0	1	0	0	0	0
Sopen00g001950	-2.41024	-4.3438	0.45798	0.498571	0	0	0	0
Sopen00g001960	0	-4.51725	0	1	0	0	0	0
Sopen00g001970	0	-4.51725	0	1	0	0	0	0
Sopen00g001980	2.24845	-4.3469	0.375956	0.539777	0	0	0	0
Sopen00g001990	0	-4.51725	0	1	0	0	0	0
Sopen00g002000	0	-4.51725	0	1	0	0	0	0
Sopen00g002010	0	-4.51725	0	1	0	0	0	0
Sopen00g002020	0	-4.51725	0	1	0	0	0	0
Sopen00g002030	0	-4.51725	0	1	0	0	0	0
Sopen00g002040	0	-4.51725	0	1	0	0	0	0
Sopen00g002050	-0.15408	-4.19781	0.00260119	0.959324	0	0	0.024926	0
Sopen00g002060	0	-4.51725	0	1	0	0	0	0
Sopen00g002070	0	-4.51725	0	1	0	0	0	0
Sopen00g002080	0	-4.51725	0	1	0	0	0	0
Sopen00g002090	0	-4.51725	0	1	0	0	0	0
Sopen00g002100	0	-4.51725	0	1	0	0	0	0
Sopen00g002110	0	-4.51725	0	1	0	0	0	0
Sopen00g002120	0	-4.51725	0	1	0	0	0	0
Sopen00g002130	0	-4.51725	0	1	0	0	0	0
Sopen00g002140	0	-4.51725	0	1	0	0	0	0
Sopen00g002150	0	-4.51725	0	1	0	0	0	0
Sopen00g002160	2.2453	-4.34849	0.375425	0.540063	0	0	0	0
Sopen00g002170	2.24845	-4.3469	0.375956	0.539777	0	0	0	0
Sopen00g002180	0	-4.51725	0	1	0	0	0	0
Sopen00g002190	0	-4.51725	0	1	0	0	0	0
Sopen00g002200	0	-4.51725	0	1	0	0	0	0
Sopen00g002210	0.16834	-1.119	0.0424436	0.836777	0	0	0	0
Sopen00g002220	2.23243	4.26965	166.327	5.07155e-38	0	0	0	0
Sopen00g002230	0.00032382	3.78456	3.19508e-06	0.998574	0	0	0	0
Sopen00g002240	4.55673	-3.71054	2.02462	0.154771	0	0	0	0
Sopen00g002250	2.2453	-4.34849	0.375425	0.540063	0	0	0	0
Sopen00g002260	3.6011	-2.83298	3.43122	0.0639782	0	0	0	0
Sopen00g002270	0.633918	-0.412944	0.945801	0.330793	0	0	0	0
Sopen00g002280	2.2453	-4.34849	0.375425	0.540063	0	0	0	0
Sopen00g002290	0	-4.51725	0	1	0	0	0	0
Sopen00g002300	1.44132	-3.12441	0.702277	0.402022	0	0	0	0
Sopen00g002310	7.64304	-1.60343	13.2738	0.000269289	0	0	0	0
Sopen00g002320	-0.161795	-4.19139	0.00281119	0.957716	0	0	0	0.070334
Sopen00g002330	0.695578	0.247624	1.72953	0.188475	0.578831	0.552798	0.2679	0.505411
Sopen00g002340	0	-4.51725	0	1	0	0	0	0
Sopen00g002350	0	-4.51725	0	1	0	0	0	0
Sopen00g002360	-0.18811	-3.70467	0.00785575	0.929374	0	0	0	0
Sopen00g002370	-0.15408	-4.19781	0.00260119	0.959324	0	0	0.010846	0
Sopen00g002380	-0.332245	0.291938	0.42461	0.514648	1.44731	1.44815	1.92653	1.41564
Sopen00g002390	-0.265956	0.793303	0.374815	0.540393	1.29153	1.24648	0.994762	2.49484
Sopen00g002400	-0.155701	2.93973	0.491556	0.483236	1.91466	1.6793	2.30535	1.95012
Sopen00g002410	-5.87301	0.34077	55.2879	1.05028e-13	0	0	0.980585	4.31778
Sopen00g002420	-0.0446691	6.96304	0.114297	0.735305	43.6388	38.2555	44.1409	42.4061
Sopen00g002430	0	-4.51725	0	1	0	0	0	0
Sopen00g002440	0	-4.51725	0	1	0	0	0	0
Sopen00g002450	0	-4.51725	0	1	0	0	0	0
Sopen00g002460	0	-4.51725	0	1	0	0	0	0
Sopen00g002470	0	-4.51725	0	1	0	0	0	0
Sopen00g002480	0	-4.51725	0	1	0	0	0	0
Sopen00g002490	0	-4.51725	0	1	0	0	0	0
Sopen00g002500	0	-4.51725	0	1	0	0	0	0
Sopen00g002510	0	-4.51725	0	1	0	0	0	0
Sopen00g002520	1.28876	0.923266	9.02093	0.00266979	0.541612	0.520979	0.081546	0.069438
Sopen00g002530	1.24602	-2.76722	0.725	0.394511	0	0.06491	0	0.189774
Sopen00g002540	2.57557	1.65741	50.9315	9.63632e-13	0.472186	0.247144	0	0
Sopen00g002550	-0.209313	-0.0344835	0.136401	0.711886	0.710825	0.427191	0.463833	0.497062
Sopen00g002560	2.08137	0.0782427	11.8245	0.000584826	0.608517	0.488633	0.125666	0.146622
Sopen00g002570	0.481017	-2.24524	0.171735	0.678576	0	0.028958	0	0.042994
Sopen00g002580	0	-4.51725	0	1	0	0	0	0
Sopen00g002590	0	-4.51725	0	1	0	0	0	0
Sopen00g002600	0	-4.51725	0	1	0	0	0	0
Sopen00g002610	0	-4.51725	0	1	0	0	0	0
Sopen00g002620	0	-4.51725	0	1	0	0	0	0
Sopen00g002630	0	-4.51725	0	1	0	0	0	0
Sopen00g002640	1.91412	0.804384	17.1527	3.45228e-05	3.16837	2.78767	0.978832	0.823607
Sopen00g002650	1.89908	-3.7153	0.637109	0.424762	0	0	0	0
Sopen00g002660	0	-4.51725	0	1	0	0	0	0
Sopen00g002670	2.01241	2.39786	54.0519	1.96917e-13	3.8882	2.30994	0.919674	0.637059
Sopen00g002680	1.89612	-3.71682	0.635272	0.42543	0	0	0.053044	0
Sopen00g002690	2.55136	-3.43542	1.34002	0.247034	0	0.291067	0	0
Sopen00g002700	1.83816	-1.19939	4.06968	0.0436624	0	0.080152	0	0.119197
Sopen00g002710	1.68679	-1.76031	2.4889	0.114655	0	0	0	0
Sopen00g002720	1.82724	-2.07767	2.30332	0.129102	0	0.076391	0.044748	0.037075
Sopen00g002730	6.42522	-2.58369	6.37813	0.0115552	0	0	0	0
Sopen00g002740	3.13093	-1.52538	7.30975	0.00685943	0.459063	0.16391	0.085453	0
Sopen00g002750	1.5523	-0.296698	5.60406	0.017921	0	0	0	0
Sopen00g002760	-2.39938	-4.34867	0.455869	0.499563	0	0	0	0
Sopen00g002770	1.86094	1.82419	32.3847	1.26871e-08	0.286265	0.180363	0.0419	0.053101
Sopen00g002780	0	-4.51725	0	1	0	0	0	0
Sopen00g002790	0	-4.51725	0	1	0	0	0	0
Sopen00g002800	0	-4.51725	0	1	0	0	0	0
Sopen00g002810	3.08638	-4.19606	0.732433	0.392098	0	0	0	0
Sopen00g002820	0	-4.51725	0	1	0	0	0	0
Sopen00g002830	0	-4.51725	0	1	0	0	0	0
Sopen00g002840	0	-4.51725	0	1	0	0	0	0
Sopen00g002850	0	-4.51725	0	1	0	0	0	0
Sopen00g002860	0	-4.51725	0	1	0	0	0	0
Sopen00g002870	0	-4.51725	0	1	0	0	0	0
Sopen00g002880	0	-4.51725	0	1	0	0	0	0
Sopen00g002890	0	-4.51725	0	1	0	0	0	0
Sopen00g002900	0	-4.51725	0	1	0	0	0	0
Sopen00g002910	0	-4.51725	0	1	0	0	0	0
Sopen00g002920	0	-4.51725	0	1	0	0	0	0
Sopen00g002930	0	-4.51725	0	1	0	0	0	0
Sopen00g002940	0	-4.51725	0	1	0	0	0	0
Sopen00g002950	-2.39938	-4.34867	0.455869	0.499563	0	0	0	0
Sopen00g002960	-2.41024	-4.3438	0.45798	0.498571	0	0	0	0
Sopen00g002970	0	-4.51725	0	1	0	0	0	0
Sopen00g002980	0	-4.51725	0	1	0	0	0	0
Sopen00g002990	0	-4.51725	0	1	0	0	0	0
Sopen00g003000	-3.26288	-4.19316	0.890759	0.345274	0	0	0	0.086192
Sopen00g003010	0	-4.51725	0	1	0	0	0	0
Sopen00g003020	0	-4.51725	0	1	0	0	0	0
Sopen00g003030	0	-4.51725	0	1	0	0	0	0
Sopen00g003040	0	-4.51725	0	1	0	0	0	0
Sopen00g003050	0	-4.51725	0	1	0	0	0	0
Sopen00g003060	0	-4.51725	0	1	0	0	0	0
Sopen00g003070	0	-4.51725	0	1	0	0	0	0
Sopen00g003080	0	-4.51725	0	1	0	0	0	0
Sopen00g003090	0	-4.51725	0	1	0	0	0	0
Sopen00g003100	0.354841	5.89228	6.84212	0.0089048	19.8467	17.494	14.3371	16.2562
Sopen00g003110	4.76029	-3.61667	2.31163	0.128413	0	0.020996	0	0
Sopen00g003120	0	-4.51725	0	1	0	0	0	0
Sopen00g003130	0	-4.51725	0	1	0	0	0	0
Sopen00g003140	0	-4.51725	0	1	0	0	0	0
Sopen00g003150	2.2453	-4.34849	0.375425	0.540063	0	0	0	0
Sopen00g003160	0	-4.51725	0	1	0	0	0	0
Sopen00g003170	0	-4.51725	0	1	0	0	0	0
Sopen00g003180	-2.41024	-4.3438	0.45798	0.498571	0	0	0	0
Sopen00g003190	0	-4.51725	0	1	0	0	0	0
Sopen00g003200	-2.91581	4.50876	294.279	7.39996e-66	1.07413	1.10471	7.41235	9.02756
Sopen00g003210	-0.442401	3.04617	4.18764	0.0407227	5.66209	6.05479	8.44349	7.73676
Sopen00g003220	-0.643633	1.56401	3.62893	0.0567866	1.22826	1.25705	1.85439	2.17053
Sopen00g003230	3.08329	-4.19763	0.73142	0.392426	0	0	0	0
Sopen00g003240	0	-4.51725	0	1	0	0	0	0
Sopen00g003250	0	-4.51725	0	1	0	0	0	0
Sopen00g003260	-7.95886	2.44544	327.034	5.73359e-73	0	0.113503	6.74564	9.47669
Sopen00g003270	0.719199	4.09712	17.8897	2.34316e-05	11.7942	12.6166	5.60924	9.53082
Sopen00g003280	0	-4.51725	0	1	0	0	0	0
Sopen00g003290	-2.41024	-4.3438	0.45798	0.498571	0	0	0	0.242963
Sopen00g003300	0	-4.51725	0	1	0	0	0	0
Sopen00g003310	0	-4.51725	0	1	0	0	0	0
Sopen00g003320	0	-4.51725	0	1	0	0	0	0
Sopen00g003330	0	-4.51725	0	1	0	0	0	0
Sopen00g003340	0	-4.51725	0	1	0	0	0	0
Sopen00g003350	0	-4.51725	0	1	0	0	0	0
Sopen00g003360	0	-4.51725	0	1	0	0	0	0
Sopen00g003370	0	-4.51725	0	1	0	0	0	0
Sopen00g003380	0	-4.51725	0	1	0	0	0	0
Sopen00g003390	2.2453	-4.34849	0.375425	0.540063	0	0	0	0
Sopen00g003400	0	-4.51725	0	1	0	0	0	0
Sopen00g003410	0	-4.51725	0	1	0	0	0	0
Sopen00g003420	0	-4.51725	0	1	0	0	0	0
Sopen00g003430	4.00508	-3.93064	1.40429	0.23601	0	0	0	0
Sopen00g003440	0	-4.51725	0	1	0	0	0	0
Sopen00g003450	0	-4.51725	0	1	0	0	0	0
Sopen00g003460	0	-4.51725	0	1	0	0	0	0
Sopen00g003470	0	-4.51725	0	1	0	0	0	0
Sopen00g003480	0	-4.51725	0	1	0	0	0	0
Sopen00g003490	0	-4.51725	0	1	0	0	0	0
Sopen00g003500	0	-4.51725	0	1	0	0	0	0
Sopen00g003510	0	-4.51725	0	1	0	0	0	0
Sopen00g003520	0	-4.51725	0	1	0	0	0	0
Sopen00g003530	0	-4.51725	0	1	0	0	0	0
Sopen00g003540	0	-4.51725	0	1	0	0	0	0
Sopen00g003550	0	-4.51725	0	1	0	0	0	0
Sopen00g003560	-2.25	-2.19981	3.19765	0.0737477	0	0	0	0
Sopen00g003570	0	-4.51725	0	1	0	0	0	0
Sopen00g003580	0	-4.51725	0	1	0	0	0	0
Sopen00g003590	0	-4.51725	0	1	0	0	0	0
Sopen00g003600	0	-4.51725	0	1	0	0	0	0
Sopen00g003610	0	-4.51725	0	1	0	0	0	0
Sopen00g003620	0	-4.51725	0	1	0	0	0	0
Sopen00g003630	0	-4.51725	0	1	0	0	0	0
Sopen00g003640	0	-4.51725	0	1	0	0	0	0
Sopen00g003650	2.2453	-4.34849	0.375425	0.540063	0	0	0	0
Sopen00g003660	-0.318277	2.34702	1.45852	0.227168	3.43044	3.06945	4.25204	4.72572
Sopen00g003670	0	-4.51725	0	1	0	0	0	0
Sopen00g003680	-3.83689	5.6068	606.614	1.69437e-133	2.36415	1.66057	29.6153	29.2313
Sopen00g003690	0	-4.51725	0	1	0	0	0	0
Sopen00g003700	0	-4.51725	0	1	0	0	0	0
Sopen00g003710	-2.7632	9.07044	296.994	1.90354e-66	82.0655	91.0601	571.901	611.937
Sopen00g003720	0.0267166	4.35851	0.0275692	0.868126	6.94118	5.38768	6.14302	6.32947
Sopen00g003730	0	-4.51725	0	1	0	0	0	0
Sopen00g003740	2.2453	-4.34849	0.375425	0.540063	0	0	0	0
Sopen00g003750	0	-4.51725	0	1	0	0	0	0
Sopen00g003760	-1.01758	-4.05681	0.139399	0.70888	0	0	0.008283	0
Sopen00g003770	0	-4.51725	0	1	0	0	0	0
Sopen00g003780	0	-4.51725	0	1	0	0	0	0
Sopen00g003790	1.17554	-2.05494	1.0648	0.302125	0	0	0	0
Sopen00g003800	0	-4.51725	0	1	0	0	0	0
Sopen00g003810	0	-4.51725	0	1	0	0	0	0
Sopen00g003820	0	-4.51725	0	1	0	0	0	0
Sopen00g003830	-2.41024	-4.3438	0.45798	0.498571	0	0	0	0
Sopen00g003840	0	-4.51725	0	1	0	0	0	0
Sopen00g003850	0	-4.51725	0	1	0	0	0	0
Sopen00g003860	0	-4.51725	0	1	0	0	0	0
Sopen00g003870	0	-4.51725	0	1	0	0	0	0
Sopen00g003880	0	-4.51725	0	1	0	0	0	0
Sopen00g003890	0	-4.51725	0	1	0	0	0	0
Sopen00g003900	0	-4.51725	0	1	0	0	0	0
Sopen00g003910	0	-4.51725	0	1	0	0	0	0
Sopen00g003920	0	-4.51725	0	1	0	0	0	0
Sopen00g003930	0.374775	-2.27072	0.102331	0.749051	0	0.087029	0.039334	0.065388
Sopen00g003940	0	-4.51725	0	1	0	0	0	0
Sopen00g003950	0	-4.51725	0	1	0	0	0	0
Sopen00g003960	0	-4.51725	0	1	0	0	0	0
Sopen00g003970	0	-4.51725	0	1	0	0	0	0
Sopen00g003980	2.2453	-4.34849	0.375425	0.540063	0	0	0	0
Sopen00g003990	0	-4.51725	0	1	0	0	0	0
Sopen00g004000	0	-4.51725	0	1	0	0	0	0
Sopen00g004010	0	-4.51725	0	1	0	0	0	0
Sopen00g004020	0	-4.51725	0	1	0	0	0	0
Sopen00g004030	0	-4.51725	0	1	0	0	0	0
Sopen00g004040	0	-4.51725	0	1	0	0	0	0
Sopen00g004050	1.03263	-3.61385	0.243593	0.621624	0	0	0.012894	0
Sopen00g004060	0.96984	-0.214396	2.46113	0.116699	0	0	0	0
Sopen00g004070	0	-4.51725	0	1	0	0	0	0
Sopen00g004080	0	-4.51725	0	1	0	0	0	0
Sopen00g004090	0	-4.51725	0	1	0	0	0	0
Sopen00g004100	0	-4.51725	0	1	0	0	0	0
Sopen00g004110	3.08949	-4.19448	0.73345	0.391769	0	0	0	0
Sopen00g004120	0	-4.51725	0	1	0	0	0	0
Sopen00g004130	0	-4.51725	0	1	0	0	0	0
Sopen00g004140	2.54157	-2.52454	2.80473	0.0939904	0	0.006471	0.005386	0
Sopen00g004150	0	-4.51725	0	1	0	0	0	0
Sopen00g004160	2.24845	-4.3469	0.375956	0.539777	0	0	0	0
Sopen00g004170	0	-4.51725	0	1	0	0	0	0
Sopen00g004180	0	-4.51725	0	1	0	0	0	0
Sopen00g004190	-0.589596	6.35265	19.5522	9.80002e-06	33.5558	34.7551	46.0503	60.7163
Sopen00g004200	0.141748	2.57271	0.330988	0.565079	2.45542	2.25332	2.30845	2.10341
Sopen00g004210	0.24822	4.87505	2.77784	0.0955804	18.3322	21.4092	19.837	14.8853
Sopen00g004220	0	-4.51725	0	1	0	0	0	0
Sopen00g004230	0	-4.51725	0	1	0	0	0	0
Sopen00g004240	0	-4.51725	0	1	0	0	0	0
Sopen00g004250	0	-4.51725	0	1	0	0	0	0
Sopen00g004260	-2.41024	-4.3438	0.45798	0.498571	0	0	0	0.018356
Sopen00g004270	0	-4.51725	0	1	0	0	0	0
Sopen00g004280	1.48466	2.01595	24.069	9.3109e-07	4.65103	5.90814	1.60285	2.0806
Sopen00g004290	0	-4.51725	0	1	0	0	0	0
Sopen00g004300	0.392969	4.02982	5.25617	0.0218713	30.3242	26.2844	25.2072	24.883
Sopen00g004310	0.725259	2.43477	7.86553	0.00503969	6.95635	8.13416	4.92486	4.5984
Sopen00g004320	0.140884	1.28483	0.146343	0.702056	1.20545	1.9509	1.46275	1.37469
Sopen00g004330	0.920433	1.52393	7.04635	0.00794408	0	0.134751	0	0
Sopen00g004340	0	-4.51725	0	1	0	0	0	0
Sopen00g004350	0	-4.51725	0	1	0	0	0	0
Sopen00g004360	-0.15408	-4.19781	0.00260119	0.959324	0	0	0	0
Sopen00g004370	0	-4.51725	0	1	0	0	0	0
Sopen00g004380	0	-4.51725	0	1	0	0	0	0
Sopen00g004390	0	-4.51725	0	1	0	0	0	0
Sopen00g004400	0	-4.51725	0	1	0	0	0	0
Sopen00g004410	0	-4.51725	0	1	0	0	0	0
Sopen00g004420	0	-4.51725	0	1	0	0	0	0
Sopen00g004430	1.43902	-1.92213	1.69936	0.192375	0	0.034762	0.015163	0
Sopen00g004440	0	-4.51725	0	1	0	0	0	0
Sopen00g004450	0	-4.51725	0	1	0	0	0	0
Sopen00g004460	0	-4.51725	0	1	0	0	0	0
Sopen00g004470	0	-4.51725	0	1	0	0	0	0
Sopen00g004480	0	-4.51725	0	1	0	0	0	0
Sopen00g004490	0	-4.51725	0	1	0	0	0	0
Sopen00g004500	0	-4.51725	0	1	0	0	0	0
Sopen00g004510	0	-4.51725	0	1	0	0	0	0
Sopen00g004520	0	-4.51725	0	1	0	0	0	0
Sopen00g004530	-2.39938	-4.34867	0.455869	0.499563	0	0	0	0
Sopen00g004540	0	-4.51725	0	1	0	0	0	0
Sopen00g004550	0	-4.51725	0	1	0	0	0	0
Sopen00g004560	-1.53868	-1.64735	2.41996	0.119801	0.216104	0.153738	0.493564	0.316577
Sopen00g004570	-0.199128	2.89059	0.782435	0.3764	2.63647	2.13171	2.92895	2.63887
Sopen00g004580	0	-4.51725	0	1	0	0	0	0
Sopen00g004590	0	-4.51725	0	1	0	0	0	0
Sopen00g004600	0	-4.51725	0	1	0	0	0	0
Sopen00g004610	0	-4.51725	0	1	0	0	0	0
Sopen00g004620	1.19649	-0.340313	3.36333	0.0666664	0	0	0	0
Sopen00g004630	-0.696152	2.27765	6.6393	0.0099769	1.29691	2.09529	4.25065	3.66745
Sopen00g004640	-1.21337	3.38402	36.4588	1.56532e-09	4.65555	3.63468	11.0099	9.02137
Sopen00g004650	0	-4.51725	0	1	0	0	0	0
Sopen00g004660	0	-4.51725	0	1	0	0	0	0
Sopen00g004670	0	-4.51725	0	1	0	0	0	0
Sopen00g004680	0	-4.51725	0	1	0	0	0	0
Sopen00g004690	0	-4.51725	0	1	0	0	0	0
Sopen00g004700	0	-4.51725	0	1	0	0	0	0
Sopen00g004710	0	-4.51725	0	1	0	0	0	0
Sopen00g004720	0	-4.51725	0	1	0	0	0	0
Sopen00g004730	0	-4.51725	0	1	0	0	0	0
Sopen00g004740	0	-4.51725	0	1	0	0	0	0
Sopen00g004750	0	-4.51725	0	1	0	0	0	0
Sopen00g004760	0	-4.51725	0	1	0	0	0	0
Sopen00g004770	3.61216	-4.0597	1.07251	0.300383	0	0	0	0
Sopen00g004780	0	-4.51725	0	1	0	0	0	0
Sopen00g004790	0	-4.51725	0	1	0	0	0	0
Sopen00g004800	0	-4.51725	0	1	0	0	0	0
Sopen00g004810	0.683903	-4.06144	0.0618856	0.803541	0	0	0	0
Sopen00g004820	2.56461	-2.88295	2.16166	0.141495	0.123301	0.046909	0.020154	0
Sopen00g004830	0	-4.51725	0	1	0	0	0	0
Sopen00g004840	0	-4.51725	0	1	0	0	0	0
Sopen00g004850	0	-4.51725	0	1	0	0	0	0
Sopen00g004860	0	-4.51725	0	1	0	0	0	0
Sopen00g004870	0	-4.51725	0	1	0	0	0	0
Sopen00g004880	0	-4.51725	0	1	0	0	0	0
Sopen00g004890	0	-4.51725	0	1	0	0	0	0
Sopen00g004900	0	-4.51725	0	1	0	0	0	0
Sopen00g004910	0	-4.51725	0	1	0	0	0	0
Sopen00g004920	0	-4.51725	0	1	0	0	0	0
Sopen00g004930	0	-4.51725	0	1	0	0	0	0
Sopen00g004940	0	-4.51725	0	1	0	0	0	0
Sopen00g004950	0	-4.51725	0	1	0	0	0	0
Sopen00g004960	0	-4.51725	0	1	0	0	0	0
Sopen00g004970	0	-4.51725	0	1	0	0	0	0
Sopen00g004980	0	-4.51725	0	1	0	0	0	0
Sopen00g004990	0	-4.51725	0	1	0	0	0	0
Sopen00g005000	0	-4.51725	0	1	0	0	0	0
Sopen00g005010	0	-4.51725	0	1	0	0	0	0
Sopen00g005020	2.86164	-3.26662	1.81216	0.178253	0	0	0	0
Sopen00g005030	2.26766	-0.755443	7.54077	0.00603304	0.162082	0.449826	0.031982	0.219083
Sopen00g005040	0	-4.51725	0	1	0	0	0	0
Sopen00g005050	0	-4.51725	0	1	0	0	0	0
Sopen00g005060	0	-4.51725	0	1	0	0	0	0
Sopen00g005070	-1.18299	-0.0251804	4.13766	0.0419421	0	0	0	0
Sopen00g005080	0	-4.51725	0	1	0	0	0	0
Sopen00g005090	0	-4.51725	0	1	0	0	0	0
Sopen00g005100	4.10895	-2.48216	5.05422	0.0245684	0	0	0	0
Sopen00g005110	2.89532	6.06177	399.899	9.04472e-89	0	0.042035	0	0
Sopen00g005120	8.04518	-1.24237	17.2243	3.32465e-05	0	0	0	0
Sopen00g005130	5.79062	8.4133	1102.34	2.94187e-240	238.471	215.876	4.38582	4.24983
Sopen00g005140	3.33408	-3.00411	2.75454	0.0969823	0	0.05354	0	0
Sopen00g005150	-0.818735	1.72992	6.52689	0.0106272	0.867428	0.920087	2.00628	1.16969
Sopen00g005160	0	-4.51725	0	1	0	0	0	0
Sopen00g005170	0	-4.51725	0	1	0	0	0	0
Sopen00g005180	2.2453	-4.34849	0.375425	0.540063	0	0	0	0
Sopen00g005190	0	-4.51725	0	1	0	0	0	0
Sopen00g005200	0	-4.51725	0	1	0	0	0	0
Sopen00g005210	0	-4.51725	0	1	0	0	0	0
Sopen00g005220	0	-4.51725	0	1	0	0	0	0
Sopen00g005230	0	-4.51725	0	1	0	0	0	0
Sopen00g005240	-2.39938	-4.34867	0.455869	0.499563	0	0	0	0
Sopen00g005250	2.24845	-4.3469	0.375956	0.539777	0	0.010037	0	0
Sopen00g005260	0	-4.51725	0	1	0	0	0	0
Sopen00g005270	0	-4.51725	0	1	0	0	0	0
Sopen00g005280	0	-4.51725	0	1	0	0	0	0
Sopen00g005290	0	-4.51725	0	1	0	0	0	0
Sopen00g005300	0	-4.51725	0	1	0	0	0	0
Sopen00g005310	2.2453	-4.34849	0.375425	0.540063	0	0	0	0
Sopen00g005320	-2.39938	-4.34867	0.455869	0.499563	0	0	0	0
Sopen00g005330	0	-4.51725	0	1	0	0	0	0
Sopen00g005340	0	-4.51725	0	1	0	0	0	0
Sopen00g005350	0	-4.51725	0	1	0	0	0	0
Sopen00g005360	0	-4.51725	0	1	0	0	0	0
Sopen00g005370	0	-4.51725	0	1	0	0	0	0
Sopen00g005380	0	-4.51725	0	1	0	0	0	0
Sopen00g005390	0	-4.51725	0	1	0	0	0	0
Sopen00g005400	0	-4.51725	0	1	0	0	0	0
Sopen00g005410	0	-4.51725	0	1	0	0	0	0
Sopen00g005420	-2.39938	-4.34867	0.455869	0.499563	0	0	0	0
Sopen00g005430	0	-4.51725	0	1	0	0	0	0
Sopen00g005440	0	-4.51725	0	1	0	0	0	0
Sopen00g005450	0	-4.51725	0	1	0	0	0	0
Sopen00g005460	0	-4.51725	0	1	0	0	0	0
Sopen00g005470	0	-4.51725	0	1	0	0	0	0
Sopen00g005480	0	-4.51725	0	1	0	0	0	0
Sopen00g005490	0	-4.51725	0	1	0	0	0	0
Sopen00g005500	0	-4.51725	0	1	0	0	0	0
Sopen00g005510	0	-4.51725	0	1	0	0	0	0
Sopen00g005520	0	-4.51725	0	1	0	0	0	0
Sopen00g005530	0	-4.51725	0	1	0	0	0	0
Sopen00g005540	0	-4.51725	0	1	0	0	0	0
Sopen00g005550	0	-4.51725	0	1	0	0	0	0
Sopen00g005560	0	-4.51725	0	1	0	0	0	0
Sopen00g005570	0	-4.51725	0	1	0	0	0	0
Sopen00g005580	0	-4.51725	0	1	0	0	0	0
Sopen00g005590	1.63685	-2.77122	1.16742	0.279935	0.358089	0	0	0
Sopen00g005600	0	-4.51725	0	1	0	0	0	0
Sopen00g005610	0	-4.51725	0	1	0	0	0	0
Sopen00g005620	0	-4.51725	0	1	0	0	0	0
Sopen00g005630	0	-4.51725	0	1	0	0	0	0
Sopen00g005640	0	-4.51725	0	1	0	0	0	0
Sopen00g005650	4.29846	-3.82094	1.71284	0.190621	0	0.061362	0	0
Sopen00g005660	0	-4.51725	0	1	0	0	0	0
Sopen00g005670	0	-4.51725	0	1	0	0	0	0
Sopen00g005680	0	-4.51725	0	1	0	0	0	0
Sopen00g005690	0	-4.51725	0	1	0	0	0	0
Sopen00g005700	0	-4.51725	0	1	0	0	0	0
Sopen00g005710	0	-4.51725	0	1	0	0	0	0
Sopen00g005720	0.745516	3.90601	17.7997	2.45656e-05	12.2683	10.4004	6.89667	7.29309
Sopen00g005730	2.37244	-3.5188	1.10893	0.292318	0	0.036071	0	0
Sopen00g005740	0	-4.51725	0	1	0	0	0	0
Sopen00g005750	2.33374	5.30272	243.857	6.69716e-55	49.1527	43.3299	8.96991	8.63335
Sopen00g005760	2.17345	1.48922	33.9777	5.59357e-09	2.53909	1.61062	0.518794	0.365988
Sopen00g005770	0	-4.51725	0	1	0	0	0	0
Sopen00g005780	0	-4.51725	0	1	0	0	0	0
Sopen00g005790	-0.150933	-4.19624	0.00251632	0.959993	0	0	0	0
Sopen00g005800	2.24845	-4.3469	0.375956	0.539777	0	0	0	0
Sopen00g005810	3.9967	3.65332	340.432	7.09982e-76	18.7936	20.514	1.94098	0.764878
Sopen00g005820	-2.39938	-4.34867	0.455869	0.499563	0	0	0	0
Sopen00g005830	0	-4.51725	0	1	0	0	0	0
Sopen00g005840	-3.70899	-2.97455	3.61496	0.0572653	0	0.03093	0.080855	0.18047
Sopen00g005850	-0.351685	5.19887	6.0113	0.0142164	7.14388	8.24223	10.5116	9.60623
Sopen00g005860	2.2453	-4.34849	0.375425	0.540063	0	0	0	0
Sopen00g005870	-1.14946	-3.196	0.472598	0.491796	0	0	0	0
Sopen00g005880	0	-4.51725	0	1	0	0	0	0
Sopen00g005890	3.65055	-2.13738	5.70362	0.016932	0	0.019721	0	0
Sopen00g005900	0	-4.51725	0	1	0	0	0	0
Sopen00g005910	0	-4.51725	0	1	0	0	0	0
Sopen00g005920	0	-4.51725	0	1	0	0	0	0
Sopen00g005930	0	-4.51725	0	1	0	0	0	0
Sopen00g005940	-0.207964	5.08901	2.05493	0.151718	37.7353	41.7198	47.8946	48.4718
Sopen00g005950	0	-4.51725	0	1	0	0	0	0
Sopen00g005960	0	-4.51725	0	1	0	0	0	0
Sopen00g005970	2.24845	-4.3469	0.375956	0.539777	0	0	0	0
Sopen00g005980	0	-4.51725	0	1	0	0	0	0
Sopen00g005990	0	-4.51725	0	1	0	0	0	0
Sopen00g006000	-0.462354	1.46488	1.76811	0.183619	1.5544	1.44684	2.07441	2.16941
Sopen00g006010	0	-4.51725	0	1	0	0	0	0
Sopen00g006020	0	-4.51725	0	1	0	0	0	0
Sopen00g006030	0	-4.51725	0	1	0	0	0	0
Sopen00g006040	0	-4.51725	0	1	0	0	0	0
Sopen00g006050	0	-4.51725	0	1	0	0	0	0
Sopen00g006060	-2.41024	-4.3438	0.45798	0.498571	0	0	0	0
Sopen00g006070	0	-4.51725	0	1	0	0	0	0
Sopen00g006080	0	-4.51725	0	1	0	0	0	0
Sopen00g006090	0	-4.51725	0	1	0	0	0	0
Sopen00g006100	0	-4.51725	0	1	0	0	0	0
Sopen00g006110	-2.39938	-4.34867	0.455869	0.499563	0	0	0	0
Sopen00g006120	2.2453	-4.34849	0.375425	0.540063	0	0	0	0
Sopen00g006130	0	-4.51725	0	1	0	0	0	0
Sopen00g006140	0	-4.51725	0	1	0	0	0	0
Sopen00g006150	0	-4.51725	0	1	0	0	0	0
Sopen00g006160	0	-4.51725	0	1	0	0	0	0
Sopen00g006170	1.18097	-2.07039	1.07478	0.299872	0	0	0	0
Sopen00g006180	0	-4.51725	0	1	0	0	0	0
Sopen00g006190	1.03949	1.40484	8.26113	0.00405123	3.33056	3.33356	1.3974	1.77348
Sopen00g006200	-0.510517	4.46709	10.384	0.00127158	20.6561	24.0483	32.8976	31.6398
Sopen00g006210	0	-4.51725	0	1	0	0	0	0
Sopen00g006220	0	-4.51725	0	1	0	0	0	0
Sopen00g006230	0	-4.51725	0	1	0	0	0	0
Sopen00g006240	0	-4.51725	0	1	0	0	0	0
Sopen00g006250	0	-4.51725	0	1	0	0	0	0
Sopen00g006260	0	-4.51725	0	1	0	0	0	0
Sopen00g006270	0	-4.51725	0	1	0	0	0	0
Sopen00g006280	2.24845	-4.3469	0.375956	0.539777	0	0	0	0
Sopen00g006290	0	-4.51725	0	1	0	0	0	0
Sopen00g006300	0	-4.51725	0	1	0	0	0	0
Sopen00g006310	0	-4.51725	0	1	0	0	0	0
Sopen00g006320	2.30795	-2.66332	2.19267	0.138672	0	0	0	0.063218
Sopen00g006330	0	-4.51725	0	1	0	0	0	0
Sopen00g006340	0	-4.51725	0	1	0	0	0	0
Sopen00g006350	0	-4.51725	0	1	0	0	0	0
Sopen00g006360	2.2453	-4.34849	0.375425	0.540063	0	0	0	0
Sopen00g006370	0	-4.51725	0	1	0	0	0	0
Sopen00g006380	0	-4.51725	0	1	0	0	0	0
Sopen00g006390	0	-4.51725	0	1	0	0	0	0
Sopen00g006400	0	-4.51725	0	1	0	0	0	0
Sopen00g006410	0	-4.51725	0	1	0	0	0	0
Sopen00g006420	-0.15408	-4.19781	0.00260119	0.959324	0	0	0.023134	0
Sopen00g006430	4.30737	-3.81632	1.71965	0.189742	0	0.197841	0	0
Sopen00g006440	0	-4.51725	0	1	0	0	0	0
Sopen00g006450	3.08329	-4.19763	0.73142	0.392426	0	0	0	0
Sopen00g006460	0	-4.51725	0	1	0	0	0	0
Sopen00g006470	-0.125827	5.71329	0.843277	0.358464	28.147	31.409	32.6382	33.8856
Sopen00g006480	0	-4.51725	0	1	0	0	0	0
Sopen00g006490	0	-4.51725	0	1	0	0	0	0
Sopen00g006500	-1.69677	-2.06443	2.1921	0.138723	0	0	0	0
Sopen00g006510	3.08329	-4.19763	0.73142	0.392426	0	0	0	0
Sopen00g006520	0	-4.51725	0	1	0	0	0	0
Sopen00g006530	0	-4.51725	0	1	0	0	0	0
Sopen00g006540	1.12463	-2.66947	0.652268	0.419305	0	0.034463	0	0
Sopen00g006550	0	-4.51725	0	1	0	0	0	0
Sopen00g006560	0	-4.51725	0	1	0	0	0	0
Sopen00g006570	0	-4.51725	0	1	0	0	0	0
Sopen00g006580	0.384578	0.811874	0.792878	0.373234	0.876977	0.952054	0.742798	0.687789
Sopen00g006590	0	-4.51725	0	1	0	0	0	0
Sopen00g006600	-3.12986	-2.34944	4.69765	0.0302064	0	0	0.036204	0.04894
Sopen00g006610	0	-4.51725	0	1	0	0	0	0
Sopen00g006620	0	-4.51725	0	1	0	0	0	0
Sopen00g006630	0	-4.51725	0	1	0	0	0	0
Sopen00g006640	0	-4.51725	0	1	0	0	0	0
Sopen00g006650	0	-4.51725	0	1	0	0	0	0
Sopen00g006660	0	-4.51725	0	1	0	0	0	0
Sopen00g006670	0	-4.51725	0	1	0	0	0	0
Sopen00g006680	0	-4.51725	0	1	0	0	0	0
Sopen00g006690	0	-4.51725	0	1	0	0	0	0
Sopen00g006700	0	-4.51725	0	1	0	0	0	0
Sopen00g006710	0	-4.51725	0	1	0	0	0	0
Sopen00g006720	-0.161795	-4.19139	0.00281119	0.957716	0	0	0	0.173524
Sopen00g006730	1.6772	5.49017	137.319	1.08283e-31	0	0	0.020362	0
Sopen00g006740	2.02995	0.898769	20.7525	5.23314e-06	0	0.064049	0.084141	0
Sopen00g006750	-2.39938	-4.34867	0.455869	0.499563	0	0	0.082348	0
Sopen00g006760	1.37477	-2.533	1.03764	0.308373	0.131614	0.125267	0.063505	0
Sopen00g006770	0.687	-4.05988	0.0623605	0.802804	0	0	0.018968	0
Sopen00g006780	-2.41024	-4.3438	0.45798	0.498571	0	0	0	0
Sopen00g006790	0	-4.51725	0	1	0	0	0	0
Sopen00g006800	2.31562	-2.3542	2.73806	0.0979874	0.283064	0.252185	0.061985	0.104732
Sopen00g006810	1.21277	-3.93548	0.220541	0.638629	0	0.019651	0.016951	0
Sopen00g006820	0	-4.51725	0	1	0	0	0	0
Sopen00g006830	0	-4.51725	0	1	0	0	0	0
Sopen00g006840	0	-4.51725	0	1	0	0	0	0
Sopen00g006850	0	-4.51725	0	1	0	0	0	0
Sopen00g006860	0	-4.51725	0	1	0	0	0	0
Sopen00g006870	0	-4.51725	0	1	0	0	0	0
Sopen00g006880	0	-4.51725	0	1	0	0	0	0
Sopen00g006890	0	-4.51725	0	1	0	0	0	0
Sopen00g006900	0	-4.51725	0	1	0	0	0	0
Sopen00g006910	0	-4.51725	0	1	0	0	0	0
Sopen00g006920	0	-4.51725	0	1	0	0	0	0
Sopen00g006930	0	-4.51725	0	1	0	0	0	0
Sopen00g006940	5.53139	-3.19521	3.72093	0.0537375	0	0	0	0
Sopen00g006950	0	-4.51725	0	1	0	0	0	0
Sopen00g006960	0	-4.51725	0	1	0	0	0	0
Sopen00g006970	0	-4.51725	0	1	0	0	0	0
Sopen00g006980	2.2453	-4.34849	0.375425	0.540063	0	0	0	0
Sopen00g006990	0	-4.51725	0	1	0	0	0	0
Sopen00g007000	3.99304	-3.93685	1.39677	0.237268	0	0	0	0
Sopen00g007010	1.19404	6.84147	79.5737	4.73029e-19	0	0.015008	0	0
Sopen00g007020	0	-4.51725	0	1	0	0	0	0
Sopen00g007030	0	-4.51725	0	1	0	0	0	0
Sopen00g007040	0.596461	3.70983	10.5102	0.00118761	0	0.46226	0.400803	0.229272
Sopen00g007050	0	-4.51725	0	1	0	0	0	0
Sopen00g007060	-2.43208	0.324982	19.1188	1.22969e-05	0.105455	0.173417	0.803079	0.576917
Sopen00g007070	0	-4.51725	0	1	0	0	0	0
Sopen00g007080	0.764817	1.22132	4.02834	0.0447449	0	1.15714	1.39142	1.74198
Sopen00g007090	0.123154	5.36462	0.763365	0.38228	34.8081	33.1908	31.1574	31.5532
Sopen00g007100	4.99082	1.45313	104.333	1.76338e-24	1.78049	0	0	0
Sopen00g007110	0	-4.51725	0	1	0	0	0	0
Sopen00g007120	0	-4.51725	0	1	0	0	0	0
Sopen00g007130	0	-4.51725	0	1	0	0	0	0
Sopen00g007140	0	-4.51725	0	1	0	0	0	0
Sopen00g007150	0	-4.51725	0	1	0	0	0	0
Sopen00g007160	0	-4.51725	0	1	0	0	0	0
Sopen00g007170	0	-4.51725	0	1	0	0	0	0
Sopen00g007180	0	-4.51725	0	1	0	0	0	0
Sopen00g007190	-2.41024	-4.3438	0.45798	0.498571	0	0	0	0
Sopen00g007200	0	-4.51725	0	1	0	0	0	0
Sopen00g007210	0	-4.51725	0	1	0	0	0	0
Sopen00g007220	-4.46965	-3.82335	2.06449	0.150769	0	0	0	0
Sopen00g007230	-0.164942	-4.19298	0.00290085	0.957047	0	0	0	0
Sopen00g007240	0	-4.51725	0	1	0	0	0	0
Sopen00g007250	0	-4.51725	0	1	0	0	0	0
Sopen00g007260	0	-4.51725	0	1	0	0	0	0
Sopen00g007270	0	-4.51725	0	1	0	0	0	0
Sopen00g007280	0	-4.51725	0	1	0	0	0	0
Sopen00g007290	0	-4.51725	0	1	0	0	0	0
Sopen00g007300	0	-4.51725	0	1	0	0	0	0
Sopen00g007310	0	-4.51725	0	1	0	0	0	0
Sopen00g007320	-2.22435	-3.71751	0.910296	0.340038	0	0	0.096771	0
Sopen00g007330	0	-4.51725	0	1	0	0	0	0
Sopen00g007340	0	-4.51725	0	1	0	0	0	0
Sopen00g007350	0	-4.51725	0	1	0	0	0	0
Sopen00g007360	2.2453	-4.34849	0.375425	0.540063	0	0	0	0
Sopen00g007370	4.00508	-3.93064	1.40429	0.23601	0	0.016573	0	0
Sopen00g007380	0	-4.51725	0	1	0	0	0	0
Sopen00g007390	0	-4.51725	0	1	0	0	0	0
Sopen00g007400	0	-4.51725	0	1	0	0	0	0
Sopen00g007410	0.50867	2.51083	4.08005	0.0433952	1.53184	1.53913	1.13867	0.851822
Sopen00g007420	0	-4.51725	0	1	0	0	0	0
Sopen00g007430	0	-4.51725	0	1	0	0	0	0
Sopen00g007440	1.73525	-0.130466	7.48098	0.00623663	0	0	0	0
Sopen00g007450	0	-4.51725	0	1	0	0	0	0
Sopen00g007460	0	-4.51725	0	1	0	0	0	0
Sopen00g007470	0	-4.51725	0	1	0	0	0	0
Sopen00g007480	0	-4.51725	0	1	0	0	0	0
Sopen00g007490	0	-4.51725	0	1	0	0	0	0
Sopen00g007500	0	-4.51725	0	1	0	0	0	0
Sopen00g007510	0	-4.51725	0	1	0	0	0	0
Sopen00g007520	0	-4.51725	0	1	0	0	0	0
Sopen00g007530	2.2453	-4.34849	0.375425	0.540063	0	0	0	0
Sopen00g007540	0	-4.51725	0	1	0	0	0	0
Sopen00g007550	2.24845	-4.3469	0.375956	0.539777	0	0	0	0
Sopen00g007560	0	-4.51725	0	1	0	0	0	0
Sopen00g007570	0	-4.51725	0	1	0	0	0	0
Sopen00g007580	0	-4.51725	0	1	0	0	0	0
Sopen00g007590	0	-4.51725	0	1	0	0	0	0
Sopen00g007600	-2.27586	-3.69384	0.94943	0.329867	0	0	0	0.356915
Sopen00g007610	0	-4.51725	0	1	0	0	0	0
Sopen00g007620	0	-4.51725	0	1	0	0	0	0
Sopen00g007630	2.2453	-4.34849	0.375425	0.540063	0	0	0	0
Sopen00g007640	0	-4.51725	0	1	0	0	0	0
Sopen00g007650	0	-4.51725	0	1	0	0	0	0
Sopen00g007660	0	-4.51725	0	1	0	0	0	0
Sopen00g007670	0	-4.51725	0	1	0	0	0	0
Sopen00g007680	0	-4.51725	0	1	0	0	0	0
Sopen00g007690	8.12849	-1.17805	18.095	2.10368e-05	0.576805	0.81579	0	0
Sopen00g007700	8.7213	2.49668	331.79	5.32388e-74	18.1118	12.077	0.097601	0
Sopen00g007710	0	-4.51725	0	1	0	0	0	0
Sopen00g007720	0	-4.51725	0	1	0	0	0	0
Sopen00g007730	0	-4.51725	0	1	0	0	0	0
Sopen00g007740	3.08329	-4.19763	0.73142	0.392426	0	0	0	0
Sopen00g007750	0	-4.51725	0	1	0	0	0	0
Sopen00g007760	0	-4.51725	0	1	0	0	0	0
Sopen00g007770	0	-4.51725	0	1	0	0	0	0
Sopen00g007780	0	-4.51725	0	1	0	0	0	0
Sopen00g007790	0	-4.51725	0	1	0	0	0	0
Sopen00g007800	0	-4.51725	0	1	0	0	0	0
Sopen00g007810	0	-4.51725	0	1	0	0	0	0
Sopen00g007820	0	-4.51725	0	1	0	0	0	0
Sopen00g007830	0	-4.51725	0	1	0	0	0	0
Sopen00g007840	0	-4.51725	0	1	0	0	0	0
Sopen00g007850	0	-4.51725	0	1	0	0	0	0
Sopen00g007860	0	-4.51725	0	1	0	0	0	0
Sopen00g007870	0	-4.51725	0	1	0	0	0	0
Sopen00g007880	0	-4.51725	0	1	0	0	0	0
Sopen00g007890	0	-4.51725	0	1	0	0	0	0
Sopen00g007900	0	-4.51725	0	1	0	0	0	0
Sopen00g007910	0	-4.51725	0	1	0	0	0	0
Sopen00g007920	0	-4.51725	0	1	0	0	0	0
Sopen00g007930	0	-4.51725	0	1	0	0	0	0
Sopen00g007940	0	-4.51725	0	1	0	0	0	0
Sopen00g007950	0	-4.51725	0	1	0	0	0	0
Sopen00g007960	0	-4.51725	0	1	0	0	0	0
Sopen00g007970	0	-4.51725	0	1	0	0	0	0
Sopen00g007980	-6.0065	-2.99865	5.35912	0.0206164	0	0	0	0
Sopen00g007990	-1.20643	-2.64257	0.790143	0.374059	0	0.087755	0.150247	0.132124
Sopen00g008000	0	-4.51725	0	1	0	0	0	0
Sopen00g008010	2.24845	-4.3469	0.375956	0.539777	0	0	0	0
Sopen00g008020	0	-4.51725	0	1	0	0	0	0
Sopen00g008030	0	-4.51725	0	1	0	0	0	0
Sopen00g008040	0	-4.51725	0	1	0	0	0	0
Sopen00g008050	0	-4.51725	0	1	0	0	0	0
Sopen00g008060	0	-4.51725	0	1	0	0	0	0
Sopen00g008070	0	-4.51725	0	1	0	0	0	0
Sopen00g008080	0	-4.51725	0	1	0	0	0	0
Sopen00g008090	0.74494	-1.628	0.58687	0.443634	0.065099	0.044591	0.032948	0.055843
Sopen00g008100	0.600949	2.52943	5.73044	0.0166753	2.75735	3.25732	2.02659	2.26485
Sopen00g008110	0.0203865	5.1179	0.0198944	0.887833	43.9805	48.915	47.6595	45.1252
Sopen00g008120	-0.0487616	0.248459	0.00887362	0.924951	2.2215	1.85556	3.27859	2.09144
Sopen00g008130	0	-4.51725	0	1	0	0	0	0
Sopen00g008140	2.24845	-4.3469	0.375956	0.539777	0	0	0	0
Sopen00g008150	-4.71842	-3.71769	2.42734	0.119238	0	0	0	0
Sopen00g008160	0	-4.51725	0	1	0	0	0	0
Sopen00g008170	-2.41024	-4.3438	0.45798	0.498571	0	0	0	0
Sopen00g008180	0	-4.51725	0	1	0	0	0	0
Sopen00g008190	-0.1888	1.64172	0.331873	0.56456	2.63067	2.69833	3.00579	3.06735
Sopen00g008200	-4.16731	-3.93755	1.68822	0.19384	0	0	0.049313	0
Sopen00g008210	0	-4.51725	0	1	0	0	0	0
Sopen00g008220	0	-4.51725	0	1	0	0	0	0
Sopen00g008230	0	-4.51725	0	1	0	0	0	0
Sopen00g008240	0	-4.51725	0	1	0	0	0	0
Sopen00g008250	0	-4.51725	0	1	0	0	0	0
Sopen00g008260	0	-4.51725	0	1	0	0	0	0
Sopen00g008270	0.389418	-3.35305	0.048169	0.826281	0	0.045261	0.059714	0
Sopen00g008280	-3.63831	6.50489	608.401	6.96192e-134	12.0699	13.9313	178.029	153.953
Sopen00g008290	0	-4.51725	0	1	0	0	0	0
Sopen00g008300	0	-4.51725	0	1	0	0	0	0
Sopen00g008310	0	-4.51725	0	1	0	0	0	0
Sopen00g008320	0	-4.51725	0	1	0	0	0	0
Sopen00g008330	0	-4.51725	0	1	0	0	0	0
Sopen00g008340	2.24845	-4.3469	0.375956	0.539777	0	0	0	0
Sopen00g008350	-2.39938	-4.34867	0.455869	0.499563	0	0	0	0
Sopen00g008360	-2.41024	-4.3438	0.45798	0.498571	0	0	0	0.150478
Sopen00g008370	0	-4.51725	0	1	0	0	0	0
Sopen00g008380	0	-4.51725	0	1	0	0	0	0
Sopen00g008390	0	-4.51725	0	1	0	0	0	0
Sopen00g008400	2.35292	-3.51865	1.09002	0.296471	0	0.050087	0	0.074129
Sopen00g008410	0	-4.51725	0	1	0	0	0	0
Sopen00g008420	0	-4.51725	0	1	0	0	0	0
Sopen00g008430	0.359363	-0.0609031	0.387961	0.533375	0	0	0	0
Sopen00g008440	0	-4.51725	0	1	0	0	0	0
Sopen00g008450	1.5416	3.36176	56.4373	5.85528e-14	15.0208	13.629	3.71958	6.86003
Sopen00g008460	0	-4.51725	0	1	0	0	0	0
Sopen00g008470	0	-4.51725	0	1	0	0	0	0
Sopen00g008480	0	-4.51725	0	1	0	0	0	0
Sopen00g008490	0	-4.51725	0	1	0	0	0	0
Sopen00g008500	0	-4.51725	0	1	0	0	0	0
Sopen00g008510	0.753411	-3.42499	0.161465	0.687812	0	0.043079	0.009314	0.0319
Sopen00g008520	0	-4.51725	0	1	0	0	0	0
Sopen00g008530	0.673041	-4.05664	0.0601533	0.806254	0	0	0	0
Sopen00g008540	0	-4.51725	0	1	0	0	0	0
Sopen00g008550	0	-4.51725	0	1	0	0	0	0
Sopen00g008560	0	-4.51725	0	1	0	0	0	0
Sopen00g008570	-1.74127	-3.17174	1.01211	0.314401	0	2e-06	3e-06	0.000112
Sopen00g008580	0.948405	5.7737	47.4017	5.82096e-12	38.6868	34.5538	18.6984	21.3074
Sopen00g008590	0	-4.51725	0	1	0	0	0	0
Sopen00g008600	0	-4.51725	0	1	0	0	0	0
Sopen00g008610	-7.84183	-1.56136	15.9428	6.53376e-05	0	0	0.434258	0.520547
Sopen00g008620	5.84565	-2.99539	4.49877	0.0339219	0	0.18605	0	0
Sopen00g008630	-1.95115	-2.20302	2.55022	0.110282	0	0.110063	0.381766	0.202962
Sopen00g008640	0	-4.51725	0	1	0	0	0	0
Sopen00g008650	0	-4.51725	0	1	0	0	0	0
Sopen00g008660	0	-4.51725	0	1	0	0	0	0
Sopen00g008670	0	-4.51725	0	1	0	0	0	0
Sopen00g008680	0	-4.51725	0	1	0	0	0	0
Sopen00g008690	1.10847	4.91127	54.5161	1.55505e-13	34.9348	34.1784	17.2683	15.6992
Sopen00g008700	0	-4.51725	0	1	0	0	0	0
Sopen00g008710	0	-4.51725	0	1	0	0	0	0
Sopen00g008720	-6.0608	-2.97162	5.48527	0.0191795	0	0	0.056782	0.193633
Sopen00g008730	0	-4.51725	0	1	0	0	0	0
Sopen00g008740	0	-4.51725	0	1	0	0	0	0
Sopen00g008750	0.408686	1.75152	1.66017	0.197584	1.29524	1.40119	1.25311	0.90643
Sopen00g008760	0.611626	1.5759	3.28286	0.0700102	1.04963	1.03567	0.660188	0.775097
Sopen00g008770	0	-4.51725	0	1	0	0	0	0
Sopen00g008780	0	-4.51725	0	1	0	0	0	0
Sopen00g008790	0	-4.51725	0	1	0	0	0	0
Sopen00g008800	0	-4.51725	0	1	0	0	0	0
Sopen00g008810	0.346225	-3.81808	0.0231022	0.879192	0	0	0	0.137985
Sopen00g008820	0.162444	1.27735	0.194356	0.659317	1.65643	1.68482	1.60567	1.21607
Sopen00g008830	-0.452311	1.88544	2.20988	0.137133	6.16495	8.28947	9.32611	10.1293
Sopen00g008840	0	-4.51725	0	1	0	0	0	0
Sopen00g008850	0	-4.51725	0	1	0	0	0	0
Sopen00g008860	0	-4.51725	0	1	0	0	0	0
Sopen00g008870	0	-4.51725	0	1	0	0	0	0
Sopen00g008880	0	-4.51725	0	1	0	0	0	0
Sopen00g008890	0	-4.51725	0	1	0	0	0	0
Sopen00g008900	0	-4.51725	0	1	0	0	0	0
Sopen00g008910	0	-4.51725	0	1	0	0	0	0
Sopen00g008920	-0.732399	-3.35322	0.172852	0.67759	0	0.030609	0.079512	0.045453
Sopen00g008930	3.08949	-4.19448	0.73345	0.391769	0	0.027343	0	0
Sopen00g008940	0	-4.51725	0	1	0	0	0	0
Sopen00g008950	-5.4205	-3.35996	3.77479	0.0520334	0	0	0	0
Sopen00g008960	0	-4.51725	0	1	0	0	0	0
Sopen00g008970	1.30529	-3.19827	0.556394	0.455719	0	0.141098	0.119949	0.204055
Sopen00g008980	0.141999	-2.81692	0.0100659	0.920083	0	0.227755	0.129845	0.113621
Sopen00g008990	0	-4.51725	0	1	0	0	0	0
Sopen00g009000	-0.813899	2.37161	9.57294	0.00197527	0.501506	0.312468	0.686451	0.365813
Sopen00g009010	-1.01961	6.78558	58.4148	2.14375e-14	31.594	32.1844	68.3196	56.0591
Sopen00g009020	0	-4.51725	0	1	0	0	0	0
Sopen00g009030	0	-4.51725	0	1	0	0	0	0
Sopen00g009040	2.2453	-4.34849	0.375425	0.540063	0	0	0	0
Sopen00g009050	0	-4.51725	0	1	0	0	0	0
Sopen00g009060	0	-4.51725	0	1	0	0	0	0
Sopen00g009070	0	-4.51725	0	1	0	0	0	0
Sopen00g009080	0	-4.51725	0	1	0	0	0	0
Sopen00g009090	9.59391	3.35594	628.129	3.81358e-138	32.0138	36.9503	0.098035	0.159696
Sopen00g009100	0	-4.51725	0	1	0	0	0	0
Sopen00g009110	0	-4.51725	0	1	0	0	0	0
Sopen00g009120	2.24845	-4.3469	0.375956	0.539777	0	0	0	0
Sopen00g009130	0	-4.51725	0	1	0	0	0	0
Sopen00g009140	2.00166	-2.57758	1.89271	0.1689	0	0.086432	0.07475	0
Sopen00g009150	0	-4.51725	0	1	0	0	0	0
Sopen00g009160	0	-4.51725	0	1	0	0	0	0
Sopen00g009170	4.3786	0.89701	59.4457	1.26996e-14	5.80626	4.20331	0.066064	0.805252
Sopen00g009180	0.294935	1.41402	0.698018	0.403453	5.21902	2.98717	4.11299	3.01422
Sopen00g009190	0	-4.51725	0	1	0	0	0	0
Sopen00g009200	-0.970903	-3.06995	0.384234	0.535347	0	0.053752	0.094331	0
Sopen00g009210	0	-4.51725	0	1	0	0	0	0
Sopen00g009220	0	-4.51725	0	1	0	0	0	0
Sopen00g009230	0	-4.51725	0	1	0	0	0	0
Sopen00g009240	0	-4.51725	0	1	0	0	0	0
Sopen00g009250	0	-4.51725	0	1	0	0	0	0
Sopen00g009260	0.29716	3.99138	2.96442	0.0851186	7.41141	7.1195	6.4134	5.78366
Sopen00g009270	0	-4.51725	0	1	0	0	0	0
Sopen00g009280	2.2453	-4.34849	0.375425	0.540063	0	0	0	0
Sopen00g009290	0	-4.51725	0	1	0	0	0	0
Sopen00g009300	0	-4.51725	0	1	0	0	0	0
Sopen00g009310	0	-4.51725	0	1	0	0	0	0
Sopen00g009320	0	-4.51725	0	1	0	0	0	0
Sopen00g009330	0	-4.51725	0	1	0	0	0	0
Sopen00g009340	-3.27364	-4.1883	0.894828	0.344175	0	0	0	0.122953
Sopen00g009350	0	-4.51725	0	1	0	0	0	0
Sopen00g009360	0	-4.51725	0	1	0	0	0	0
Sopen00g009370	2.2453	-4.34849	0.375425	0.540063	0	0	0	0
Sopen00g009380	0	-4.51725	0	1	0	0	0	0
Sopen00g009390	0	-4.51725	0	1	0	0	0	0
Sopen00g009400	-2.11783	4.99518	191.276	1.85544e-43	5.54767	6.50051	23.8261	28.047
Sopen00g009410	-1.83836	5.24086	155.45	1.19519e-35	4.63344	6.12626	18.0072	20.5867
Sopen00g009420	0	-4.51725	0	1	0	0	0	0
Sopen00g009430	0	-4.51725	0	1	0	0	0	0
Sopen00g009440	0	-4.51725	0	1	0	0	0	0
Sopen00g009450	0	-4.51725	0	1	0	0	0	0
Sopen00g009460	0	-4.51725	0	1	0	0	0	0
Sopen00g009470	-1.51142	7.2534	124.031	8.66047e-29	36.3051	37.3504	104.938	111.364
Sopen00g009480	0	-4.51725	0	1	0	0	0	0
Sopen00g009490	1.21889	-3.93237	0.222495	0.637147	0	0	0	0
Sopen00g009500	2.2453	-4.34849	0.375425	0.540063	0	0	0	0
Sopen00g009510	0	-4.51725	0	1	0	0	0	0
Sopen00g009520	0	-4.51725	0	1	0	0	0	0
Sopen00g009530	0	-4.51725	0	1	0	0	0	0
Sopen00g009540	0	-4.51725	0	1	0	0	0	0
Sopen00g009550	0	-4.51725	0	1	0	0	0	0
Sopen00g009560	0	-4.51725	0	1	0	0	0	0
Sopen00g009570	0	-4.51725	0	1	0	0	0	0
Sopen00g009580	-2.39938	-4.34867	0.455869	0.499563	0	0	0	0
Sopen00g009590	0	-4.51725	0	1	0	0	0	0
Sopen00g009600	0	-4.51725	0	1	0	0	0	0
Sopen00g009610	0	-4.51725	0	1	0	0	0	0
Sopen00g009620	0	-4.51725	0	1	0	0	0	0
Sopen00g009630	-2.41024	-4.3438	0.45798	0.498571	0	0	0	0
Sopen00g009640	2.2453	-4.34849	0.375425	0.540063	0	0	0	0
Sopen00g009650	-0.164942	-4.19298	0.00290085	0.957047	0	0	0	0
Sopen00g009660	-1.64301	0.153233	8.69898	0.00318471	0.457523	0.51344	2.09908	0.969325
Sopen00g009670	0	-4.51725	0	1	0	0	0	0
Sopen00g009680	0	-4.51725	0	1	0	0	0	0
Sopen00g009690	0	-4.51725	0	1	0	0	0	0
Sopen00g009700	0	-4.51725	0	1	0	0	0	0
Sopen00g009710	0	-4.51725	0	1	0	0	0	0
Sopen00g009720	0	-4.51725	0	1	0	0	0	0
Sopen00g009730	0	-4.51725	0	1	0	0	0	0
Sopen00g009740	0	-4.51725	0	1	0	0	0	0
Sopen00g009750	0	-4.51725	0	1	0	0	0	0
Sopen00g009760	0.676138	-4.05507	0.0606215	0.805517	0	0	0	0
Sopen00g009770	0	-4.51725	0	1	0	0	0	0
Sopen00g009780	0	-4.51725	0	1	0	0	0	0
Sopen00g009790	0	-4.51725	0	1	0	0	0	0
Sopen00g009800	0	-4.51725	0	1	0	0	0	0
Sopen00g009810	-0.865428	-0.138794	2.10524	0.146799	0.581638	0.379203	0.780901	1.20526
Sopen00g009820	0	-4.51725	0	1	0	0	0	0
Sopen00g009830	0.377938	0.829414	0.771811	0.37966	7.83452	8.57803	6.06055	8.14029
Sopen00g009840	0	-4.51725	0	1	0	0	0	0
Sopen00g009850	0	-4.51725	0	1	0	0	0	0
Sopen00g009860	-1.78133	1.91944	32.3197	1.31181e-08	1.08309	2.05105	3.33531	7.6042
Sopen00g009870	3.08638	-4.19606	0.732433	0.392098	0	0	0	0
Sopen00g009880	0	-4.51725	0	1	0	0	0	0
Sopen00g009890	0	-4.51725	0	1	0	0	0	0
Sopen00g009900	0	-4.51725	0	1	0	0	0	0
Sopen00g009910	0	-4.51725	0	1	0	0	0	0
Sopen00g009920	0	-4.51725	0	1	0	0	0	0
Sopen00g009930	0	-4.51725	0	1	0	0	0	0
Sopen00g009940	0	-4.51725	0	1	0	0	0	0
Sopen00g009950	2.2453	-4.34849	0.375425	0.540063	0	0	0	0
Sopen00g009960	-4.92966	-3.61939	2.7785	0.0955413	0	0	0.060205	0
Sopen00g009970	0	-4.51725	0	1	0	0	0	0
Sopen00g009980	-4.71842	-3.71769	2.42734	0.119238	0	0	0.126136	0
Sopen00g009990	0	-4.51725	0	1	0	0	0	0
Sopen00g010000	0	-4.51725	0	1	0	0	0	0
Sopen00g010010	-1.56713	-2.79653	1.13939	0.285784	0	0	0	0.055768
Sopen00g010020	0	-4.51725	0	1	0	0	0	0
Sopen00g010030	-3.26288	-4.19316	0.890759	0.345274	0	0	0	0
Sopen00g010040	0	-4.51725	0	1	0	0	0	0
Sopen00g010050	0	-4.51725	0	1	0	0	0	0
Sopen00g010060	2.2453	-4.34849	0.375425	0.540063	0	0	0	0
Sopen00g010070	0	-4.51725	0	1	0	0	0	0
Sopen00g010080	0	-4.51725	0	1	0	0	0	0
Sopen00g010090	2.79733	-0.489701	12.2225	0.000472394	1.48882	1.3974	0.047278	0.480948
Sopen00g010100	0	-4.51725	0	1	0	0	0	0
Sopen00g010110	0	-4.51725	0	1	0	0	0	0
Sopen00g010120	0	-4.51725	0	1	0	0	0	0
Sopen00g010130	0	-4.51725	0	1	0	0	0	0
Sopen00g010140	0	-4.51725	0	1	0	0	0	0
Sopen00g010150	0	-4.51725	0	1	0	0	0	0
Sopen00g010160	0	-4.51725	0	1	0	0	0	0
Sopen00g010170	0	-4.51725	0	1	0	0	0	0
Sopen00g010180	0	-4.51725	0	1	0	0	0	0
Sopen00g010190	0.593614	-2.77488	0.178936	0.67229	0	0.205087	0.351298	0
Sopen00g010200	0	-4.51725	0	1	0	0	0	0
Sopen00g010210	0	-4.51725	0	1	0	0	0	0
Sopen00g010220	0.514622	-3.51598	0.0706441	0.790402	0	0.028139	0	0.039567
Sopen00g010230	-0.0868019	2.17316	0.0979614	0.754291	6.41578	5.10099	6.73774	6.31506
Sopen00g010240	0	-4.51725	0	1	0	0	0	0
Sopen00g010250	0	-4.51725	0	1	0	0	0	0
Sopen00g010260	0	-4.51725	0	1	0	0	0	0
Sopen00g010270	0	-4.51725	0	1	0	0	0	0
Sopen00g010280	0	-4.51725	0	1	0	0	0	0
Sopen00g010290	0	-4.51725	0	1	0	0	0	0
Sopen00g010300	0	-4.51725	0	1	0	0	0	0
Sopen00g010310	0	-4.51725	0	1	0	0	0	0
Sopen00g010320	0	-4.51725	0	1	0	0	0	0
Sopen00g010330	0	-4.51725	0	1	0	0	0	0
Sopen00g010340	0	-4.51725	0	1	0	0	0	0
Sopen00g010350	0	-4.51725	0	1	0	0	0	0
Sopen00g010360	0	-4.51725	0	1	0	0	0	0
Sopen00g010370	-5.51696	2.85815	331.983	4.83512e-74	0.290061	0.247259	15.8797	10.7975
Sopen00g010380	0	-4.51725	0	1	0	0	0	0
Sopen00g010390	0	-4.51725	0	1	0	0	0	0
Sopen00g010400	0	-4.51725	0	1	0	0	0	0
Sopen00g010410	5.31854	-1.51619	11.9823	0.000537325	0.875049	0.78464	0.057657	0
Sopen00g010420	2.24845	-4.3469	0.375956	0.539777	0	0	0	0
Sopen00g010430	-0.256243	5.76132	3.51654	0.0607625	33.5515	35.4386	40.7703	41.2129
Sopen00g010440	1.84399	-2.23955	2.08929	0.148338	0.131282	0.199545	0.063907	0.037105
Sopen00g010450	0	-4.51725	0	1	0	0	0	0
Sopen00g010460	0	-4.51725	0	1	0	0	0	0
Sopen00g010470	0	-4.51725	0	1	0	0	0	0
Sopen00g010480	0	-4.51725	0	1	0	0	0	0
Sopen00g010490	0	-4.51725	0	1	0	0	0	0
Sopen00g010500	-2.39938	-4.34867	0.455869	0.499563	0	0	0	0
Sopen00g010510	0.409218	2.58402	2.76091	0.0965965	11.1334	12.2745	12.9531	9.73427
Sopen00g010520	0.790403	-2.52749	0.370526	0.542719	0.243623	0.159019	0.137	0.11689
Sopen00g010530	0	-4.51725	0	1	0	0	0	0
Sopen00g010540	0	-4.51725	0	1	0	0	0	0
Sopen00g010550	0.242538	5.74506	3.14392	0.0762138	69.1913	76.004	68.1713	61.436
Sopen00g010560	2.24845	-4.3469	0.375956	0.539777	0	0	0	0
Sopen00g010570	0	-4.51725	0	1	0	0	0	0
Sopen00g010580	0	-4.51725	0	1	0	0	0	0
Sopen00g010590	0	-4.51725	0	1	0	0	0	0
Sopen00g010600	0	-4.51725	0	1	0	0	0	0
Sopen00g010610	0	-4.51725	0	1	0	0	0	0
Sopen00g010620	0	-4.51725	0	1	0	0	0	0
Sopen00g010630	0	-4.51725	0	1	0	0	0	0
Sopen00g010640	0	-4.51725	0	1	0	0	0	0
Sopen00g010650	0	-4.51725	0	1	0	0	0	0
Sopen00g010660	0	-4.51725	0	1	0	0	0	0
Sopen00g010670	0	-4.51725	0	1	0	0	0	0
Sopen00g010680	0	-4.51725	0	1	0	0	0	0
Sopen00g010690	0	-4.51725	0	1	0	0	0	0
Sopen00g010700	0	-4.51725	0	1	0	0	0	0
Sopen00g010710	-2.3615	1.25401	34.5306	4.21085e-09	1.42759	1.17343	5.52655	8.46952
Sopen00g010720	2.2453	-4.34849	0.375425	0.540063	0	0	0	0
Sopen00g010730	0	-4.51725	0	1	0	0	0	0
Sopen00g010740	0	-4.51725	0	1	0	0	0	0
Sopen00g010750	0	-4.51725	0	1	0	0	0	0
Sopen00g010760	0	-4.51725	0	1	0	0	0	0
Sopen00g010770	2.24845	-4.3469	0.375956	0.539777	0	0	0	0
Sopen00g010780	0	-4.51725	0	1	0	0	0	0
Sopen00g010790	0	-4.51725	0	1	0	0	0	0
Sopen00g010800	-1.13376	0.439583	5.24939	0.0219568	1.22885	0.982612	2.80921	1.30527
Sopen00g010810	0	-4.51725	0	1	0	0	0	0
Sopen00g010820	0	-4.51725	0	1	0	0	0	0
Sopen00g010830	0	-4.51725	0	1	0	0	0	0
Sopen00g010840	0	-4.51725	0	1	0	0	0	0
Sopen00g010850	0	-4.51725	0	1	0	0	0	0
Sopen00g010860	0	-4.51725	0	1	0	0	0	0
Sopen00g010870	0	-4.51725	0	1	0	0	0	0
Sopen00g010880	-2.41024	-4.3438	0.45798	0.498571	0	0	0	0.16595
Sopen00g010890	0	-4.51725	0	1	0	0	0	0
Sopen00g010900	0	-4.51725	0	1	0	0	0	0
Sopen00g010910	0	-4.51725	0	1	0	0	0	0
Sopen00g010920	0	-4.51725	0	1	0	0	0	0
Sopen00g010930	0	-4.51725	0	1	0	0	0	0
Sopen00g010940	-1.92006	3.48303	91.3719	1.21908e-21	3.80091	3.93049	13.5329	16.6156
Sopen00g010950	0	-4.51725	0	1	0	0	0	0
Sopen00g010960	0	-4.51725	0	1	0	0	0	0
Sopen00g010970	0	-4.51725	0	1	0	0	0	0
Sopen00g010980	0	-4.51725	0	1	0	0	0	0
Sopen00g010990	0	-4.51725	0	1	0	0	0	0
Sopen00g011000	0	-4.51725	0	1	0	0	0	0
Sopen00g011010	0	-4.51725	0	1	0	0	0	0
Sopen00g011020	0	-4.51725	0	1	0	0	0	0
Sopen00g011030	0	-4.51725	0	1	0	0	0	0
Sopen00g011040	0	-4.51725	0	1	0	0	0	0
Sopen00g011050	0	-4.51725	0	1	0	0	0	0
Sopen00g011060	0	-4.51725	0	1	0	0	0	0
Sopen00g011070	0	-4.51725	0	1	0	0	0	0
Sopen00g011080	0	-4.51725	0	1	0	0	0	0
Sopen00g011090	-4.46965	-3.82335	2.06449	0.150769	0	0	0.03233	0
Sopen00g011100	0	-4.51725	0	1	0	0	0	0
Sopen00g011110	0	-4.51725	0	1	0	0	0	0
Sopen00g011120	0	-4.51725	0	1	0	0	0	0
Sopen00g011130	0	-4.51725	0	1	0	0	0	0
Sopen00g011140	0	-4.51725	0	1	0	0	0	0
Sopen00g011150	2.11158	7.94688	219.779	1.15703e-49	329.14	462.488	98.6644	89.0328
Sopen00g011160	0	-4.51725	0	1	0	0	0	0
Sopen00g011170	0	-4.51725	0	1	0	0	0	0
Sopen00g011180	0	-4.51725	0	1	0	0	0	0
Sopen00g011190	1.4279	-2.66887	0.996053	0.31827	0.169406	0.097498	0.085916	0.048946
Sopen00g011200	0	-4.51725	0	1	0	0	0	0
Sopen00g011210	0	-4.51725	0	1	0	0	0	0
Sopen00g011220	0	-4.51725	0	1	0	0	0	0
Sopen00g011230	0	-4.51725	0	1	0	0	0	0
Sopen00g011240	0	-4.51725	0	1	0	0	0	0
Sopen00g011250	0	-4.51725	0	1	0	0	0	0
Sopen00g011260	0	-4.51725	0	1	0	0	0	0
Sopen00g011270	0	-4.51725	0	1	0	0	0	0
Sopen00g011280	0	-4.51725	0	1	0	0	0	0
Sopen00g011290	0	-4.51725	0	1	0	0	0	0
Sopen00g011300	0	-4.51725	0	1	0	0	0	0
Sopen00g011310	0	-4.51725	0	1	0	0	0	0
Sopen00g011320	0	-4.51725	0	1	0	0	0	0
Sopen00g011330	0	-4.51725	0	1	0	0	0	0
Sopen00g011340	-0.0138864	0.0719122	0.000625081	0.980054	2.24922	2.64297	2.13338	3.93737
Sopen00g011350	-0.371322	-0.148134	0.392985	0.530736	0.355318	0.201654	0.340794	0.593366
Sopen00g011360	0	-4.51725	0	1	0	0	0	0
Sopen00g011370	0	-4.51725	0	1	0	0	0	0
Sopen00g011380	-0.415752	4.12168	6.10132	0.01351	5.62768	5.74893	7.70188	8.03624
Sopen00g011390	0	-4.51725	0	1	0	0	0	0
Sopen00g011400	0	-4.51725	0	1	0	0	0	0
Sopen00g011410	0	-4.51725	0	1	0	0	0	0
Sopen00g011420	0	-4.51725	0	1	0	0	0	0
Sopen00g011430	0	-4.51725	0	1	0	0	0	0
Sopen00g011440	0	-4.51725	0	1	0	0	0	0
Sopen00g011450	0	-4.51725	0	1	0	0	0	0
Sopen00g011460	0	-4.51725	0	1	0	0	0	0
Sopen00g011470	-0.553884	1.81789	3.17906	0.0745908	1.98544	2.30448	3.79138	2.81708
Sopen00g011480	0	-4.51725	0	1	0	0	0	0
Sopen00g011490	-4.16731	-3.93755	1.68822	0.19384	0	0	0.049804	0
Sopen00g011500	0	-4.51725	0	1	0	0	0	0
Sopen00g011510	0	-4.51725	0	1	0	0	0	0
Sopen00g011520	0	-4.51725	0	1	0	0	0	0
Sopen00g011530	0	-4.51725	0	1	0	0	0	0
Sopen00g011540	0	-4.51725	0	1	0	0	0	0
Sopen00g011550	0	-4.51725	0	1	0	0	0	0
Sopen00g011560	0	-4.51725	0	1	0	0	0	0
Sopen00g011570	0	-4.51725	0	1	0	0	0	0
Sopen00g011580	0	-4.51725	0	1	0	0	0	0
Sopen00g011590	0	-4.51725	0	1	0	0	0	0
Sopen00g011600	-2.39938	-4.34867	0.455869	0.499563	0	0	0.080181	0
Sopen00g011610	0	-4.51725	0	1	0	0	0	0
Sopen00g011620	2.2453	-4.34849	0.375425	0.540063	0	0	0	0
Sopen00g011630	0	-4.51725	0	1	0	0	0	0
Sopen00g011640	0	-4.51725	0	1	0	0	0	0
Sopen00g011650	0	-4.51725	0	1	0	0	0	0
Sopen00g011660	0	-4.51725	0	1	0	0	0	0
Sopen00g011670	0	-4.51725	0	1	0	0	0	0
Sopen00g011680	0	-4.51725	0	1	0	0	0	0
Sopen00g011690	0	-4.51725	0	1	0	0	0	0
Sopen00g011700	0	-4.51725	0	1	0	0	0	0
Sopen00g011710	0	-4.51725	0	1	0	0	0	0
Sopen00g011720	0	-4.51725	0	1	0	0	0	0
Sopen00g011730	0	-4.51725	0	1	0	0	0	0
Sopen00g011740	0	-4.51725	0	1	0	0	0	0
Sopen00g011750	0	-4.51725	0	1	0	0	0	0
Sopen00g011760	0	-4.51725	0	1	0	0	0	0
Sopen00g011770	0	-4.51725	0	1	0	0	0	0
Sopen00g011780	0	-4.51725	0	1	0	0	0	0
Sopen00g011790	0	-4.51725	0	1	0	0	0	0
Sopen00g011800	0	-4.51725	0	1	0	0	0	0
Sopen00g011810	0.0614558	2.33284	0.0539208	0.816377	4.47725	4.07509	4.00356	5.15534
Sopen00g011820	-1.76272	6.67276	167.772	2.45498e-38	94.0945	91.1112	351.344	289.337
Sopen00g011830	-2.38187	-3.18572	1.69024	0.193573	0	0.04945	0	0.225101
Sopen00g011840	0	-4.51725	0	1	0	0	0	0
Sopen00g011850	0	-4.51725	0	1	0	0	0	0
Sopen00g011860	0	-4.51725	0	1	0	0	0	0
Sopen00g011870	0	-4.51725	0	1	0	0	0	0
Sopen00g011880	0.812944	7.35944	36.7877	1.32244e-09	369.909	400.657	212.576	235.008
Sopen00g011890	0	-4.51725	0	1	0	0	0	0
Sopen00g011900	0	-4.51725	0	1	0	0	0	0
Sopen00g011910	0	-4.51725	0	1	0	0	0	0
Sopen00g011920	-0.161795	-4.19139	0.00281119	0.957716	0	0.016163	0	0
Sopen00g011930	0	-4.51725	0	1	0	0	0	0
Sopen00g011940	0	-4.51725	0	1	0	0	0	0
Sopen00g011950	0	-4.51725	0	1	0	0	0	0
Sopen00g011960	0	-4.51725	0	1	0	0	0	0
Sopen00g011970	-0.15408	-4.19781	0.00260119	0.959324	0	0	0.041416	0
Sopen00g011980	0	-4.51725	0	1	0	0	0	0
Sopen00g011990	0	-4.51725	0	1	0	0	0	0
Sopen00g012000	4.29846	-3.82094	1.71284	0.190621	0	0	0	0
Sopen00g012010	0	-4.51725	0	1	0	0	0	0
Sopen00g012020	0	-4.51725	0	1	0	0	0	0
Sopen00g012030	0	-4.51725	0	1	0	0	0	0
Sopen00g012040	0	-4.51725	0	1	0	0	0	0
Sopen00g012050	0	-4.51725	0	1	0	0	0	0
Sopen00g012060	0	-4.51725	0	1	0	0	0	0
Sopen00g012070	0	-4.51725	0	1	0	0	0	0
Sopen00g012080	-0.161795	-4.19139	0.00281119	0.957716	0	0	0	0.029564
Sopen00g012090	0	-4.51725	0	1	0	0	0	0
Sopen00g012100	0	-4.51725	0	1	0	0	0	0
Sopen00g012110	0	-4.51725	0	1	0	0	0	0
Sopen00g012120	0	-4.51725	0	1	0	0	0	0
Sopen00g012130	0	-4.51725	0	1	0	0	0	0
Sopen00g012140	0	-4.51725	0	1	0	0	0	0
Sopen00g012150	0	-4.51725	0	1	0	0	0	0
Sopen00g012160	1.82688	4.05624	106.983	4.63725e-25	13.4964	16.9476	4.27925	4.73987
Sopen00g012170	0	-4.51725	0	1	0	0	0	0
Sopen00g012180	0	-4.51725	0	1	0	0	0	0
Sopen00g012190	0	-4.51725	0	1	0	0	0	0
Sopen00g012200	0	-4.51725	0	1	0	0	0	0
Sopen00g012210	0	-4.51725	0	1	0	0	0	0
Sopen00g012220	0	-4.51725	0	1	0	0	0	0
Sopen00g012230	0	-4.51725	0	1	0	0	0	0
Sopen00g012240	0	-4.51725	0	1	0	0	0	0
Sopen00g012250	2.2453	-4.34849	0.375425	0.540063	0	0	0	0
Sopen00g012260	0	-4.51725	0	1	0	0	0	0
Sopen00g012270	0	-4.51725	0	1	0	0	0	0
Sopen00g012280	0	-4.51725	0	1	0	0	0	0
Sopen00g012290	0	-4.51725	0	1	0	0	0	0
Sopen00g012300	0	-4.51725	0	1	0	0	0	0
Sopen00g012310	0	-4.51725	0	1	0	0	0	0
Sopen00g012320	0	-4.51725	0	1	0	0	0	0
Sopen00g012330	0	-4.51725	0	1	0	0	0	0
Sopen00g012340	0	-4.51725	0	1	0	0	0	0
Sopen00g012350	0	-4.51725	0	1	0	0	0	0
Sopen00g012360	0	-4.51725	0	1	0	0	0	0
Sopen00g012370	0	-4.51725	0	1	0	0	0	0
Sopen00g012380	0	-4.51725	0	1	0	0	0	0
Sopen00g012390	-1.04739	3.01469	22.5775	2.02143e-06	3.05096	3.73552	6.50905	8.41547
Sopen00g012400	-7.947	4.1861	966.321	4.97094e-211	0	0.403774	27.7412	55.5743
Sopen00g012410	0	-4.51725	0	1	0	0	0	0
Sopen00g012420	0	-4.51725	0	1	0	0	0	0
Sopen00g012430	0	-4.51725	0	1	0	0	0	0
Sopen00g012440	0	-4.51725	0	1	0	0	0	0
Sopen00g012450	0	-4.51725	0	1	0	0	0	0
Sopen00g012460	0	-4.51725	0	1	0	0	0	0
Sopen00g012470	0	-4.51725	0	1	0	0	0	0
Sopen00g012480	0	-4.51725	0	1	0	0	0	0
Sopen00g012490	3.08949	-4.19448	0.73345	0.391769	0	0.127647	0	0
Sopen00g012500	0	-4.51725	0	1	0	0	0	0
Sopen00g012510	0	-4.51725	0	1	0	0	0	0
Sopen00g012520	0.541392	4.00822	9.86065	0.00168906	45.4679	49.1762	37.0957	31.9972
Sopen00g012530	0	-4.51725	0	1	0	0	0	0
Sopen00g012540	0	-4.51725	0	1	0	0	0	0
Sopen00g012550	0.884357	5.01591	35.9554	2.02651e-09	44.7397	42.1889	26.4303	20.1005
Sopen00g012560	-0.501772	0.168203	0.880363	0.348105	1.6344	2.00463	1.80667	2.69592
Sopen00g012570	0	-4.51725	0	1	0	0	0	0
Sopen00g012580	0	-4.51725	0	1	0	0	0	0
Sopen00g012590	0	-4.51725	0	1	0	0	0	0
Sopen00g012600	0.183899	3.13343	0.757861	0.384001	12.8209	6.94566	6.88382	10.2333
Sopen00g012610	-2.41024	-4.3438	0.45798	0.498571	0	0	0	0
Sopen00g012620	0	-4.51725	0	1	0	0	0	0
Sopen00g012630	0	-4.51725	0	1	0	0	0	0
Sopen00g012640	0	-4.51725	0	1	0	0	0	0
Sopen00g012650	-2.39938	-4.34867	0.455869	0.499563	0	0	0	0
Sopen00g012660	0	-4.51725	0	1	0	0	0	0
Sopen00g012670	0	-4.51725	0	1	0	0	0	0
Sopen00g012680	0	-4.51725	0	1	0	0	0	0
Sopen00g012690	0	-4.51725	0	1	0	0	0	0
Sopen00g012700	0	-4.51725	0	1	0	0	0	0
Sopen00g012710	2.24845	-4.3469	0.375956	0.539777	0	0.045323	0	0
Sopen00g012720	0	-4.51725	0	1	0	0	0	0
Sopen00g012730	0	-4.51725	0	1	0	0	0	0
Sopen00g012740	0	-4.51725	0	1	0	0	0	0
Sopen00g012750	0	-4.51725	0	1	0	0	0	0
Sopen00g012760	0	-4.51725	0	1	0	0	0	0
Sopen00g012770	0	-4.51725	0	1	0	0	0	0
Sopen00g012780	0	-4.51725	0	1	0	0	0	0
Sopen00g012790	-0.20908	-2.41888	0.0291054	0.864536	0	0	0	0
Sopen00g012800	0	-4.51725	0	1	0	0	0	0
Sopen00g012810	0	-4.51725	0	1	0	0	0	0
Sopen00g012820	-3.67809	3.61179	297.632	1.3836e-66	3.3544	4.1648	45.3413	65.2533
Sopen00g012830	0	-4.51725	0	1	0	0	0	0
Sopen00g012840	3.08638	-4.19606	0.732433	0.392098	0	0	0	0
Sopen00g012850	0	-4.51725	0	1	0	0	0	0
Sopen00g012860	0	-4.51725	0	1	0	0	0	0
Sopen00g012870	0	-4.51725	0	1	0	0	0	0
Sopen00g012880	-5.29453	-3.43199	3.47939	0.0621409	0	0	0.127883	0
Sopen00g012890	0	-4.51725	0	1	0	0	0	0
Sopen00g012900	0	-4.51725	0	1	0	0	0	0
Sopen00g012910	0	-4.51725	0	1	0	0	0	0
Sopen00g012920	0	-4.51725	0	1	0	0	0	0
Sopen00g012930	6.48426	1.73822	162.548	3.38294e-37	26.0941	39.8716	0.585335	0
Sopen00g012940	0	-4.51725	0	1	0	0	0	0
Sopen00g012950	0	-4.51725	0	1	0	0	0	0
Sopen00g012960	0	-4.51725	0	1	0	0	0	0
Sopen00g012970	0	-4.51725	0	1	0	0	0	0
Sopen00g012980	-3.2522	-4.19799	0.886732	0.346367	0	0	0.108682	0
Sopen00g012990	2.0668	4.16957	140.56	2.12307e-32	28.441	23.2076	6.73741	6.99252
Sopen00g013000	0	-4.51725	0	1	0	0	0	0
Sopen00g013010	0	-4.51725	0	1	0	0	0	0
Sopen00g013020	0	-4.51725	0	1	0	0	0	0
Sopen00g013030	-1.95008	-3.80736	0.645953	0.421565	0	0	0	0
Sopen00g013040	0	-4.51725	0	1	0	0	0	0
Sopen00g013050	-3.037	3.9708	257.668	6.6598e-58	4.37382	2.44358	20.6534	35.2116
Sopen00g013060	0	-4.51725	0	1	0	0	0	0
Sopen00g013070	0.313215	2.68781	1.72201	0.189438	3.35594	3.50669	3.53174	2.17855
Sopen00g013080	0.275709	2.13002	0.958171	0.327651	6.52093	6.12529	5.67024	5.67815
Sopen00g013090	0.325755	1.15244	0.719826	0.396203	3.48821	3.34566	3.57464	2.03166
Sopen00g013100	0	-4.51725	0	1	0	0	0	0
Sopen00g013110	0.365248	-2.3949	0.0898262	0.764399	0	0	0	0
Sopen00g013120	0	-4.51725	0	1	0	0	0	0
Sopen00g013130	-0.164388	1.22337	0.194715	0.659022	1.9044	1.45193	1.12787	0.656046
Sopen00g013140	-8.47898	-0.935679	24.6122	7.02345e-07	0	0	0	0
Sopen00g013150	0	-4.51725	0	1	0	0	0	0
Sopen00g013160	-2.22925	3.29708	109.08	1.61233e-25	5.50151	7.23247	16.324	44.4159
Sopen00g013170	0	-4.51725	0	1	0	0	0	0
Sopen00g013180	0	-4.51725	0	1	0	0	0	0
Sopen00g013190	2.2453	-4.34849	0.375425	0.540063	0	0	0	0
Sopen00g013200	0	-4.51725	0	1	0	0	0	0
Sopen00g013210	-4.6882	-0.734959	21.1141	4.33318e-06	0	0.031586	0.851355	0.891897
Sopen00g013220	0	-4.51725	0	1	0	0	0	0
Sopen00g013230	6.18382	-2.7641	5.50343	0.0189814	0	0.247803	0	0
Sopen00g013240	0	-4.51725	0	1	0	0	0	0
Sopen00g013250	0	-4.51725	0	1	0	0	0	0
Sopen00g013260	0	-4.51725	0	1	0	0	0	0
Sopen00g013270	0	-4.51725	0	1	0	0	0	0
Sopen00g013280	0	-4.51725	0	1	0	0	0	0
Sopen00g013290	0	-4.51725	0	1	0	0	0	0
Sopen00g013300	0	-4.51725	0	1	0	0	0	0
Sopen00g013310	0	-4.51725	0	1	0	0	0	0
Sopen00g013320	0	-4.51725	0	1	0	0	0	0
Sopen00g013330	0	-4.51725	0	1	0	0	0	0
Sopen00g013340	0	-4.51725	0	1	0	0	0	0
Sopen00g013350	0	-4.51725	0	1	0	0	0	0
Sopen00g013360	0	-4.51725	0	1	0	0	0	0
Sopen00g013370	-0.299817	-1.02792	0.144438	0.703909	0.406154	0.672302	0.415505	0.870168
Sopen00g013380	-0.15408	-4.19781	0.00260119	0.959324	0	0	0.042067	0
Sopen00g013390	0.19593	-1.05248	0.0618912	0.803532	0.326011	0.280731	0.386728	0.206538
Sopen00g013400	0	-4.51725	0	1	0	0	0	0
Sopen00g013410	0	-4.51725	0	1	0	0	0	0
Sopen00g013420	0	-4.51725	0	1	0	0	0	0
Sopen00g013430	3.08949	-4.19448	0.73345	0.391769	0	0.096903	0	0
Sopen00g013440	0	-4.51725	0	1	0	0	0	0
Sopen00g013450	0	-4.51725	0	1	0	0	0	0
Sopen00g013460	-0.390909	1.01448	0.942079	0.331746	1.21204	1.36655	1.77207	1.86483
Sopen00g013470	0	-4.51725	0	1	0	0	0	0
Sopen00g013480	-4.86758	3.54335	428.135	6.89403e-95	0.641436	1.03514	20.2494	30.0022
Sopen00g013490	0	-4.51725	0	1	0	0	0	0
Sopen00g013500	2.24845	-4.3469	0.375956	0.539777	0	0	0	0
Sopen00g013510	-0.741433	0.186465	1.92842	0.164934	0.728218	0.989235	1.18345	1.51353
Sopen00g013520	2.21406	5.82901	241.142	2.6084e-54	53.3043	51.9334	8.85489	15.2008
Sopen00g013530	1.03794	0.837029	5.691	0.0170542	5.32287	4.42944	2.72937	1.52357
Sopen00g013540	0	-4.51725	0	1	0	0	0	0
Sopen00g013550	0.347637	1.076	0.773955	0.378999	4.36328	4.60764	3.46141	3.51612
Sopen00g013560	0	-4.51725	0	1	0	0	0	0
Sopen00g013570	0.895109	-0.497998	1.74377	0.186666	0	0.330043	0.142331	0
Sopen00g013580	0	-4.51725	0	1	0	0	0	0
Sopen00g013590	0.636743	0.274092	1.50571	0.219798	1.10591	0.776229	0.675686	0.245965
Sopen00g013600	-0.31355	0.803585	0.529477	0.466829	3.7804	4.27794	5.20914	4.82625
Sopen00g013610	0	-4.51725	0	1	0	0	0	0
Sopen00g013620	0	-4.51725	0	1	0	0	0	0
Sopen00g013630	1.05885	0.593765	4.9582	0.0259697	1.60986	0.681985	0.587776	1.02378
Sopen00g013640	0	-4.51725	0	1	0	0	0	0
Sopen00g013650	0	-4.51725	0	1	0	0	0	0
Sopen00g013660	0	-4.51725	0	1	0	0	0	0
Sopen00g013670	0	-4.51725	0	1	0	0	0	0
Sopen00g013680	2.2453	-4.34849	0.375425	0.540063	0	0	0	0
Sopen00g013690	0	-4.51725	0	1	0	0	0	0
Sopen00g013700	4.96196	-1.81366	9.34173	0.00224059	0.652125	0.529362	0	0
Sopen00g013710	0	-4.51725	0	1	0	0	0	0
Sopen00g013720	0	-4.51725	0	1	0	0	0	0
Sopen00g013730	1.02715	-1.05502	1.56578	0.210824	0.526831	1.14564	0.475454	0.644836
Sopen00g013740	0	-4.51725	0	1	0	0	0	0
Sopen00g013750	0	-4.51725	0	1	0	0	0	0
Sopen00g013760	0	-4.51725	0	1	0	0	0	0
Sopen00g013770	0	-4.51725	0	1	0	0	0	0
Sopen00g013780	2.2453	-4.34849	0.375425	0.540063	0	0	0	0
Sopen00g013790	0	-4.51725	0	1	0	0	0	0
Sopen00g013800	0	-4.51725	0	1	0	0	0	0
Sopen00g013810	0	-4.51725	0	1	0	0	0	0
Sopen00g013820	0	-4.51725	0	1	0	0	0	0
Sopen00g013830	0	-4.51725	0	1	0	0	0	0
Sopen00g013840	0	-4.51725	0	1	0	0	0	0
Sopen00g013850	0	-4.51725	0	1	0	0	0	0
Sopen00g013860	0	-4.51725	0	1	0	0	0	0
Sopen00g013870	0	-4.51725	0	1	0	0	0	0
Sopen00g013880	0	-4.51725	0	1	0	0	0	0
Sopen00g013890	0	-4.51725	0	1	0	0	0	0
Sopen00g013900	0	-4.51725	0	1	0	0	0	0
Sopen00g013910	0	-4.51725	0	1	0	0	0	0
Sopen00g013920	0	-4.51725	0	1	0	0	0	0
Sopen00g013930	0	-4.51725	0	1	0	0	0	0
Sopen00g013940	-7.85992	0.595636	76.9752	1.76064e-18	0	0	24.853	26.9611
Sopen00g013950	0	-4.51725	0	1	0	0	0	0
Sopen00g013960	-2.13171	-2.69977	2.08195	0.149053	0	0.057847	0.175624	0.212536
Sopen00g013970	0	-4.51725	0	1	0	0	0	0
Sopen00g013980	5.10861	-3.43823	2.87881	0.089756	0	0.091049	0	0
Sopen00g013990	0	-4.51725	0	1	0	0	0	0
Sopen00g014000	0	-4.51725	0	1	0	0	0	0
Sopen00g014010	0	-4.51725	0	1	0	0	0	0
Sopen00g014020	0	-4.51725	0	1	0	0	0	0
Sopen00g014030	0	-4.51725	0	1	0	0	0	0
Sopen00g014040	0	-4.51725	0	1	0	0	0	0
Sopen00g014050	-4.71842	-3.71769	2.42734	0.119238	0	0	0.103909	0
Sopen00g014060	-1.84519	2.44352	48.0152	4.25759e-12	5.63043	3.61858	15.3867	19.524
Sopen00g014070	-0.0427817	3.28875	0.0445967	0.832748	7.19277	6.31631	7.37157	6.99143
Sopen00g014080	-0.451489	-3.25807	0.070955	0.789952	0	0	0.056757	0
Sopen00g014090	-2.39938	-4.34867	0.455869	0.499563	0	0	0.131733	0
Sopen00g014100	0	-4.51725	0	1	0	0	0	0
Sopen00g014110	0	-4.51725	0	1	0	0	0	0
Sopen00g014120	1.07103	-2.53025	0.657917	0.417299	0.179573	0.123637	0.105018	0
Sopen00g014130	-5.43699	1.5975	135.142	3.2359e-31	0	0.288643	12.4704	10.3756
Sopen00g014140	0	-4.51725	0	1	0	0	0	0
Sopen00g014150	0	-4.51725	0	1	0	0	0	0
Sopen00g014160	5.409	1.28402	99.6411	1.87881e-23	7.4089	4.28388	0.189443	0.182797
Sopen00g014170	0	-4.51725	0	1	0	0	0	0
Sopen00g014180	-3.78224	-4.0618	1.29647	0.254861	0	0	0.208091	0
Sopen00g014190	-5.90696	1.8152	170.661	5.7574e-39	0	0.16197	10.2141	7.87326
Sopen00g014200	0	-4.51725	0	1	0	0	0	0
Sopen00g014210	0	-4.51725	0	1	0	0	0	0
Sopen00g014220	0	-4.51725	0	1	0	0	0	0
Sopen00g014230	0	-4.51725	0	1	0	0	0	0
Sopen00g014240	0	-4.51725	0	1	0	0	0	0
Sopen00g014250	0	-4.51725	0	1	0	0	0	0
Sopen00g014260	0	-4.51725	0	1	0	0	0	0
Sopen00g014270	0	-4.51725	0	1	0	0	0	0
Sopen00g014280	0	-4.51725	0	1	0	0	0	0
Sopen00g014290	0	-4.51725	0	1	0	0	0	0
Sopen00g014300	0	-4.51725	0	1	0	0	0	0
Sopen00g014310	0	-4.51725	0	1	0	0	0	0
Sopen00g014320	0	-4.51725	0	1	0	0	0	0
Sopen00g014330	0	-4.51725	0	1	0	0	0	0
Sopen00g014340	0	-4.51725	0	1	0	0	0	0
Sopen00g014350	2.24991	-2.40722	2.54773	0.110456	0	0.044977	0.03851	0.032601
Sopen00g014360	-0.651123	-2.75917	0.221561	0.637854	0	0	0.023589	0.039652
Sopen00g014370	0	-4.51725	0	1	0	0	0	0
Sopen00g014380	0	-4.51725	0	1	0	0	0	0
Sopen00g014390	3.08638	-4.19606	0.732433	0.392098	0	0.113684	0	0
Sopen00g014400	3.99604	-3.9353	1.39864	0.236954	0	0	0	0
Sopen00g014410	0	-4.51725	0	1	0	0	0	0
Sopen00g014420	1.59966	-3.81957	0.420469	0.516705	0	0.023407	0	0
Sopen00g014430	1.4974	-3.43395	0.572923	0.449102	0	0	0	0
Sopen01g001010	0	-4.51725	0	1	0	0	0	0
Sopen01g001020	1.19464	6.67711	79.4597	5.011e-19	44.1019	46.97	19.5365	20.1374
Sopen01g001030	0	-4.51725	0	1	0	0	0	0
Sopen01g001040	-8.32482	3.35362	624.766	2.03127e-137	0	0	17.2364	16.9327
Sopen01g001050	0	-4.51725	0	1	0	0	0	0
Sopen01g001060	-2.14665	-0.0956015	11.6227	0.000651798	0	0.218674	0.605434	0.44531
Sopen01g001070	0.0627103	4.73614	0.170937	0.679281	13.0421	11.8229	12.6773	11.6536
Sopen01g001080	0	-4.51725	0	1	0.132425	0.128411	0.3278	0.34257
Sopen01g001090	0.357757	6.78862	7.32048	0.00681862	31.6941	33.3234	24.0941	27.0257
Sopen01g001100	-2.96925	1.44232	56.9299	4.55845e-14	0.564525	0.680631	3.84692	5.12228
Sopen01g001110	-9.13157	3.61168	761.899	5.1863e-167	0	0.055233	12.477	17.62
Sopen01g001120	-0.187003	4.62976	1.47285	0.224899	10.4406	9.01156	11.7209	10.4509
Sopen01g001130	0.508402	2.82667	4.88735	0.0270567	10.6072	9.64757	7.61058	6.62332
Sopen01g001140	1.4514	5.61652	105.92	7.923e-25	61.0803	46.1117	14.186	26.4004
Sopen01g001150	-0.844979	4.98788	32.6785	1.09076e-08	15.4264	17.2498	30.5493	31.044
Sopen01g001160	-0.774359	0.395621	2.41099	0.12049	0.2391	0.432104	0.578007	0.495338
Sopen01g001170	-1.70988	2.67263	47.7387	4.90208e-12	4.37513	4.24579	15.0799	13.1082
Sopen01g001180	-9.86311	0.343289	66.5034	3.53741e-16	0	0	3.83044	4.92135
Sopen01g001190	-6.49948	5.114	1144.13	3.14467e-249	0.802309	0.432096	44.7629	50.0739
Sopen01g001200	0.206301	-3.61099	0.0105076	0.918355	0	0	0	0
Sopen01g001210	-1.18997	0.0176523	4.3288	0.0374755	0.316047	0.437194	0.926665	0.556612
Sopen01g001220	-0.835373	-1.20564	0.991884	0.319285	0.469242	0.213741	0.423292	0.46503
Sopen01g001230	1.22335	-2.13348	1.08722	0.297091	0.258605	0.116557	0.102965	0.171653
Sopen01g001240	-0.365709	6.95452	7.64204	0.00570349	33.0471	35.9221	46.8544	43.5358
Sopen01g001250	-3.72957	2.22834	135.8	2.32392e-31	0.347709	0.368893	4.44433	4.29229
Sopen01g001260	2.24845	-4.3469	0.375956	0.539777	0	0	0	0
Sopen01g001270	-1.32295	5.62129	88.8947	4.25845e-21	15.2961	13.0699	37.9965	34.842
Sopen01g001280	0.803732	4.75575	27.8138	1.33876e-07	25.4338	21.3064	11.4774	15.3549
Sopen01g001290	0.262206	2.73775	1.24353	0.264794	7.20944	5.00381	6.01114	5.49833
Sopen01g001300	0.484647	3.8063	7.26226	0.00704317	13.4738	11.3682	9.57701	10.4723
Sopen01g001310	2.41479	4.18843	187.094	1.51101e-42	28.7068	24.4342	3.77036	6.53081
Sopen01g001320	-0.995017	7.68317	53.4411	2.6866e-13	43.9488	73.7883	137.695	98.1306
Sopen01g001330	-0.706363	-3.81672	0.0968414	0.755654	0	0	0	0
Sopen01g001340	-5.69945	-1.47405	14.7518	0.000122711	0	0.052172	0.412232	1.38664
Sopen01g001350	-0.239183	7.13125	3.25872	0.071048	41.488	45.0509	46.5998	58.8631
Sopen01g001360	0.66761	5.60982	23.1709	1.48466e-06	24.9084	31.6466	18.5259	18.0854
Sopen01g001370	7.23417	5.28177	1299.27	1.70884e-282	57.6474	107.292	0.216244	1.24109
Sopen01g001380	0	-4.51725	0	1	0	0	0	0
Sopen01g001390	0.716866	1.7544	5.04555	0.0246917	5.56644	6.65748	4.2019	3.66585
Sopen01g001400	0.288792	3.29853	2.03497	0.153721	5.72862	6.78891	4.50049	5.38378
Sopen01g001410	-5.52372	2.1384	203.643	3.7618e-46	0	0.371309	9.49753	10.0938
Sopen01g001420	-2.95323	3.9331	241.808	1.86876e-54	6.13096	5.59426	47.1796	42.3905
Sopen01g001430	-2.41123	3.38247	131.362	2.16602e-30	6.61391	7.10786	38.426	36.015
Sopen01g001440	-0.817668	3.62242	18.882	1.39211e-05	5.16227	5.33685	9.38561	9.461
Sopen01g001450	-0.261476	7.92278	3.66544	0.0555551	148.961	141.581	174.653	179.007
Sopen01g001460	-0.774315	2.65514	10.2221	0.00138819	4.73781	5.59299	8.99657	9.93239
Sopen01g001470	-1.23878	2.37214	21.6544	3.26921e-06	4.29099	4.09724	8.6753	10.0973
Sopen01g001480	-5.339	5.38225	952.556	4.5413e-208	3.52433	4.04269	155.77	152.218
Sopen01g001490	-1.38511	3.65426	53.5326	2.56447e-13	4.53599	5.00739	11.5036	12.4231
Sopen01g001500	-0.0450757	4.37409	0.0789016	0.778792	11.2901	13.2994	13.9266	11.9856
Sopen01g001510	9.60804	0.191604	52.693	3.93121e-13	2.52018	2.34476	0	0
Sopen01g001520	3.99304	-3.93685	1.39677	0.237268	0	0	0	0
Sopen01g001530	2.24845	-4.3469	0.375956	0.539777	0	0.019206	0	0
Sopen01g001540	-0.943759	5.80753	47.2063	6.43072e-12	33.9787	26.3329	63.779	60.5736
Sopen01g001550	-2.29006	3.86864	150.673	1.31713e-34	3.27505	2.66697	13.0517	16.7793
Sopen01g001560	-0.194926	4.82374	1.69084	0.193493	12.82	12.9273	15.0532	14.7189
Sopen01g001570	0	-4.51725	0	1	0	0	0	0
Sopen01g001580	-2.40845	6.81969	299.415	5.67474e-67	17.2319	18.8765	94.9534	101.867
Sopen01g001590	1.3295	9.22039	73.4194	1.06454e-17	537.415	395.828	196.595	181.215
Sopen01g001600	-0.534732	5.02666	13.3239	0.000262186	25.4389	22.8228	34.0483	41.6245
Sopen01g001610	-0.211087	5.23837	2.18634	0.139243	30.0143	31.3088	34.8932	40.6259
Sopen01g001620	-0.59447	6.67767	20.1054	7.33787e-06	48.1783	44.6176	73.8183	75.3328
Sopen01g001630	0	-4.51725	0	1	0	0	0	0
Sopen01g001640	0.239862	7.91752	3.08682	0.0789322	162.914	154.367	127.828	141.352
Sopen01g001650	0	-4.51725	0	1	0	0	0	0
Sopen01g001660	-0.551884	3.93013	9.92998	0.00162661	8.34384	8.57026	12.865	12.2595
Sopen01g001670	3.25803	-0.674931	13.5844	0.000228206	0.975922	0.518083	0.0312	0
Sopen01g001680	0.188997	1.96503	0.405792	0.524115	3.393	2.89441	2.24789	3.16932
Sopen01g001690	-7.91305	2.40319	316.128	1.3346e-70	0	0.124948	14.8319	13.5654
Sopen01g001700	-1.34744	6.87146	100.49	1.22436e-23	27.9182	32.0227	75.0634	81.5513
Sopen01g001710	0.165665	4.15127	0.983097	0.321438	7.12038	6.98599	7.19544	5.60956
Sopen01g001720	-6.45054	1.48799	142.188	9.36495e-33	0	0	2.3009	2.42052
Sopen01g001730	-6.76093	7.55534	1502.52	0	1.45342	1.56697	170.262	140.29
Sopen01g001740	-7.46718	2.72866	387.86	3.67978e-86	0	0.111604	12.6914	9.24183
Sopen01g001750	-7.58419	1.68708	180.383	4.37886e-41	0	0	10.49	5.35848
Sopen01g001760	-3.69023	-1.92194	7.6119	0.00579961	0	0	0.05141	0
Sopen01g001770	-5.20142	-1.88772	10.5685	0.00115075	0	0	0.169668	0.346012
Sopen01g001780	0.779098	2.22163	7.94547	0.00482183	2.67233	2.46499	1.53605	1.69902
Sopen01g001790	0	-4.51725	0	1	0	0	0	0
Sopen01g001800	0.910775	2.9732	16.7062	4.36749e-05	3.16605	5.58554	2.2821	2.56854
Sopen01g001810	-0.0194543	4.95817	0.0174476	0.894914	21.5058	22.583	24.0768	23.749
Sopen01g001820	0.327311	7.07386	6.10751	0.0134627	128.045	118.648	106.316	103.484
Sopen01g001830	-1.22972	4.53878	60.0623	9.28573e-15	7.54833	7.76911	15.7047	21.5847
Sopen01g001840	0.27624	3.2355	1.8026	0.179402	11.026	10.5924	8.16578	10.1403
Sopen01g001850	0.176532	1.96468	0.35526	0.551152	1.74531	1.43565	1.28741	1.2738
Sopen01g001860	-0.861554	-3.51783	0.201011	0.653907	0	0.029993	0.027188	0.021137
Sopen01g001870	-9.15832	5.28618	1620.1	0	0	0.106374	35.9288	28.0027
Sopen01g001880	-10.3099	3.03921	543.729	6.62066e-120	0	0	16.2279	14.2722
Sopen01g001890	0	-4.51725	0	1	0	0	0	0
Sopen01g001900	-0.433005	-2.71691	0.102951	0.748318	0	0.130265	0.084374	0.047124
Sopen01g001910	0.0605861	4.61242	0.153791	0.69494	18.1329	20.2108	16.4888	20.2094
Sopen01g001920	0.113749	3.76768	0.395823	0.529256	9.14222	10.6743	10.4851	8.73256
Sopen01g001930	1.88703	5.17301	160.511	9.40939e-37	29.1713	34.4366	8.8792	8.7918
Sopen01g001940	0.0792786	2.38431	0.0926516	0.760834	3.8628	4.1203	4.24459	3.98624
Sopen01g001950	-0.164942	-4.19298	0.00290085	0.957047	0	0	0	0
Sopen01g001960	0.232565	6.06037	2.99503	0.0835236	46.584	44.5733	40.0913	43.0236
Sopen01g001970	0.54529	6.05598	16.3762	5.19753e-05	28.6333	30.174	20.1916	20.0328
Sopen01g001980	-0.0378374	3.75171	0.0434995	0.834788	5.88863	6.71783	6.79463	6.09392
Sopen01g001990	-2.184	1.28901	31.0734	2.49159e-08	0.979266	0.411508	3.22111	3.42441
Sopen01g002000	2.58518	6.57358	338.345	2.01355e-75	210.733	251.825	41.0413	36.6321
Sopen01g002010	0.464675	4.42375	8.48079	0.00359004	14.089	13.6255	10.0409	10.9432
Sopen01g002020	0.414185	4.79926	7.55731	0.00597792	10.3083	9.82445	7.50916	7.67143
Sopen01g002030	-1.46842	5.44347	105.532	9.63672e-25	30.0916	37.7386	102.684	93.6506
Sopen01g002040	0.326961	4.56726	4.40912	0.03575	6.9173	7.28549	6.18057	5.62656
Sopen01g002050	5.92051	-0.975436	18.448	1.74786e-05	1.09078	1.01969	0	0.067754
Sopen01g002060	-8.15139	-1.28198	19.4034	1.05943e-05	0	0	1.92639	1.6532
Sopen01g002070	0	-4.51725	0	1	0	0	0	0
Sopen01g002080	-2.01376	-2.33826	2.44126	0.118185	0	0	0.196723	0.162822
Sopen01g002090	0.19986	2.01747	0.468806	0.493539	3.23468	2.06238	1.73809	2.8478
Sopen01g002100	-1.64245	3.38536	64.987	7.63124e-16	1.60782	1.83669	4.25146	6.93668
Sopen01g002110	0.313542	5.6443	5.17472	0.0229202	30.2992	30.0118	24.2812	27.3067
Sopen01g002120	0.243739	7.5488	3.30368	0.069128	71.6196	74.3663	63.523	62.5865
Sopen01g002130	-0.690276	4.84754	21.1536	4.24483e-06	19.6088	19.4683	37.5233	29.6882
Sopen01g002140	0.738076	-1.06199	0.828824	0.362615	0.344561	0.209262	0.157306	0.349873
Sopen01g002150	3.08638	-4.19606	0.732433	0.392098	0	0.126664	0	0
Sopen01g002160	-3.37187	4.29626	348.475	1.27753e-77	2.23678	3.10645	30.196	26.244
Sopen01g002170	-0.307077	6.75751	5.39721	0.0201712	135.937	119.036	149.92	167.054
Sopen01g002180	0.0639638	4.06925	0.141978	0.706324	12.2762	11.6277	11.6575	11.7828
Sopen01g002190	-0.0333781	3.19277	0.0258309	0.872314	3.81284	2.99094	3.42648	3.75529
Sopen01g002200	0.543325	5.8918	15.9826	6.39791e-05	34.7482	31.9033	20.3414	24.7305
Sopen01g002210	-1.05524	0.414529	4.48569	0.0341824	1.00976	0.45032	1.26993	1.64154
Sopen01g002220	0.426309	2.22467	2.40776	0.120738	2.51802	3.1093	1.75282	2.73138
Sopen01g002230	0.250892	5.84818	3.40755	0.064902	29.712	30.5645	25.2972	27.7601
Sopen01g002240	-5.99397	1.44245	130.299	3.69712e-30	0	0.323279	10.4156	17.1875
Sopen01g002250	1.02594	0.425707	4.1892	0.0406853	3.10301	3.57998	1.56694	1.36031
Sopen01g002260	0.916907	1.68779	7.78029	0.00528306	4.47567	4.44029	2.07043	3.24574
Sopen01g002270	-0.232149	7.88142	2.90375	0.0883771	80.2742	78.8212	95.237	95.6018
Sopen01g002280	0	-4.51725	0	1	0	0	0	0
Sopen01g002290	-4.07032	5.07049	596.37	2.76914e-131	2.53407	6.04414	96.052	57.4482
Sopen01g002300	-1.17917	7.6298	74.8396	5.18767e-18	128.745	119.604	332.46	244.981
Sopen01g002310	0	-4.51725	0	1	0	0	0	0
Sopen01g002320	-3.84712	3.01495	231.423	3.3885e-52	0.997738	0.748833	13.4071	12.7563
Sopen01g002330	-2.14824	4.22768	155.09	1.43181e-35	3.46382	4.06465	18.1364	19.5902
Sopen01g002340	1.22155	3.91879	47.033	7.02501e-12	10.5739	9.2377	4.2877	4.29475
Sopen01g002350	0.0887898	7.50869	0.440224	0.507016	29.6755	31.5941	29.699	29.3755
Sopen01g002360	-1.28367	7.16376	90.8892	1.55554e-21	14.2013	13.4314	29.8266	37.8032
Sopen01g002370	-5.49999	-0.900226	21.3556	3.82029e-06	0	0	0.16668	1.00443
Sopen01g002380	-0.161795	-4.19139	0.00281119	0.957716	0	0	0	0
Sopen01g002390	0.474469	8.83654	10.4339	0.00123767	591.927	735.166	434.042	538.333
Sopen01g002400	2.25386	-1.94027	3.47353	0.0623615	0.585116	0.433511	0.166823	0.182459
Sopen01g002410	0	-4.51725	0	1	0	0	0	0
Sopen01g002420	0.518512	8.3416	13.5681	0.000230202	222.673	303.707	171.022	201.799
Sopen01g002430	0.0505152	-3.26547	0.000906738	0.975978	0	0	0	0.038141
Sopen01g002440	1.41188	5.72889	102.169	5.25184e-24	57.21	58.1199	19.6242	24.8006
Sopen01g002450	2.24845	-4.3469	0.375956	0.539777	0	0	0	0
Sopen01g002460	0.35145	3.36748	3.11454	0.0775998	12.5981	11.7122	8.88231	11.4027
Sopen01g002470	0.210228	4.37276	1.71318	0.190577	9.24818	11.348	9.65355	8.67322
Sopen01g002480	0.517568	3.53306	7.30084	0.00689352	7.54904	6.37953	4.19654	4.80705
Sopen01g002490	-0.669174	5.45107	22.6982	1.89844e-06	23.7513	23.0094	39.7121	37.6815
Sopen01g002500	-0.346265	2.67841	2.09322	0.147957	2.22006	2.21968	2.6009	3.16075
Sopen01g002510	0	-4.51725	0	1	0	0	0	0
Sopen01g002520	6.53067	-0.422085	29.0603	7.03376e-08	0.137199	0.223701	0	0.02524
Sopen01g002530	8.49976	5.01557	1379.34	1.22661e-299	20.2739	27.2035	0.086182	0.096163
Sopen01g002540	-7.71853	-1.67529	14.7323	0.000123989	0	0	0.528304	0.669354
Sopen01g002550	-1.57873	-2.4329	1.48316	0.223284	0	0.061677	0.054137	0.18236
Sopen01g002560	-7.41398	-1.95662	12.1199	0.000499092	0	0	0.072772	0.240558
Sopen01g002570	-0.171027	-0.678221	0.0609292	0.805034	1.11115	0.183615	1.04722	0.265468
Sopen01g002580	0	-4.51725	0	1	0	0	0	0
Sopen01g002590	3.08638	-4.19606	0.732433	0.392098	0	0.006203	0	0
Sopen01g002600	0	-4.51725	0	1	0	0	0	0
Sopen01g002610	0	-4.51725	0	1	0	0	0	0
Sopen01g002620	-0.618203	4.75709	16.5801	4.66781e-05	13.4814	12.3208	18.8312	21.565
Sopen01g002630	3.08329	-4.19763	0.73142	0.392426	0	0	0	0
Sopen01g002640	3.03656	1.31079	51.4918	7.24506e-13	1.66078	1.44799	0.238858	0.255095
Sopen01g002650	-5.81196	1.43826	126.744	2.21104e-29	0	0.068116	1.8078	2.4491
Sopen01g002660	-0.771599	2.37765	8.62221	0.00332173	2.42499	2.81406	4.26553	4.80619
Sopen01g002670	-0.253288	4.50227	2.59723	0.107054	10.2762	10.5247	13.9505	10.0308
Sopen01g002680	-3.69282	3.52924	287.504	2.19068e-64	0.92511	0.891137	10.785	11.9369
Sopen01g002690	0.201947	4.89169	1.84635	0.174212	14.9105	14.1846	11.7417	13.7989
Sopen01g002700	0.667796	5.10504	21.0771	4.41758e-06	10.9687	11.3711	7.30436	6.95269
Sopen01g002710	-5.11606	3.74074	506.672	6.86039e-112	0.321623	0.072761	5.95691	8.57397
Sopen01g002720	-0.870292	-2.93929	0.343755	0.557671	0	0.054888	0.09563	0.027009
Sopen01g002730	-2.39938	-4.34867	0.455869	0.499563	0	0	0	0
Sopen01g002740	-1.20945	3.10946	31.449	2.05344e-08	2.51397	2.49974	5.86419	6.058
Sopen01g002750	0	-4.51725	0	1	0	0	0	0
Sopen01g002760	2.2453	-4.34849	0.375425	0.540063	0	0	0	0
Sopen01g002770	-4.25491	3.80116	405.726	4.93831e-90	1.58205	1.43158	28.4798	26.517
Sopen01g002780	0.325823	6.21204	5.94607	0.014752	42.3203	42.6833	35.4209	35.6023
Sopen01g002790	-0.198255	5.27834	1.94456	0.163177	22.7558	26.0328	27.428	29.4309
Sopen01g002800	0	-4.51725	0	1	0	0	0	0
Sopen01g002810	-1.4518	8.60784	98.3051	3.68606e-23	98.5286	113.998	288.681	301.966
Sopen01g002820	-1.3904	6.76448	106.762	5.1848e-25	24.9655	29.1083	67.4044	78.8453
Sopen01g002830	0.0578979	-3.27153	0.00117655	0.972637	0	0.018002	0.03196	0
Sopen01g002840	0.100565	1.58636	0.0909061	0.763029	0.820353	0.889612	0.919232	0.765532
Sopen01g002850	0.567938	3.14915	7.23911	0.00713456	5.6643	5.56944	4.00798	4.91795
Sopen01g002860	1.53452	6.00828	123.921	9.15689e-29	30.6892	30.839	10.1904	12.3111
Sopen01g002870	0.734767	6.04647	29.5638	5.42477e-08	10.9962	10.592	7.28129	6.04106
Sopen01g002880	-0.110957	4.27745	0.461686	0.496839	5.15705	6.37884	5.71989	7.3168
Sopen01g002890	-1.52148	7.5394	123.366	1.21063e-28	141.745	162.799	414.99	486.116
Sopen01g002900	-4.95945	-3.60531	2.81373	0.0934645	0	0	0.097676	0.253995
Sopen01g002910	0.123505	1.33739	0.116386	0.732988	0.815499	0.764192	0.774591	0.928201
Sopen01g002920	-3.50066	2.5842	155.076	1.44227e-35	0.344235	0.687636	6.0286	5.43218
Sopen01g002930	-0.680978	4.93904	21.0834	4.40307e-06	20.6899	16.7737	32.166	28.2868
Sopen01g002940	-5.4017	4.08009	633.35	2.8433e-139	0.430893	0.768739	26.0574	26.8367
Sopen01g002950	-0.0772716	6.12947	0.333021	0.563887	16.6172	16.4249	17.9922	17.7617
Sopen01g002960	0.106087	4.71135	0.485611	0.485894	6.94518	7.33345	6.87386	6.6706
Sopen01g002970	1.36508	7.08894	102.578	4.27357e-24	145.613	120.023	48.0784	56.4252
Sopen01g002980	-0.111367	4.77128	0.544278	0.460667	15.4493	14.0287	15.8453	16.4253
Sopen01g002990	-1.64176	3.71409	76.0755	2.77562e-18	6.03807	4.3266	15.5619	18.2275
Sopen01g003000	1.29446	5.57882	84.5056	3.90988e-20	47.7943	59.5515	18.9768	26.8758
Sopen01g003010	-0.116963	4.63375	0.576934	0.447518	20.2679	18.2405	19.3567	23.0159
Sopen01g003020	-0.807106	5.99957	35.444	2.63456e-09	39.3332	36.0045	66.1123	67.8766
Sopen01g003030	-3.64518	-3.006	3.48256	0.0620219	0	0	0.218342	0.051878
Sopen01g003040	-0.30818	3.55071	2.62704	0.105061	4.21706	5.57368	6.50862	5.91729
Sopen01g003050	0.827528	7.81809	36.6841	1.3946e-09	96.0376	97.0693	57.384	55.8609
Sopen01g003060	1.58279	-3.81791	0.411961	0.520978	0	0	0	0
Sopen01g003070	0	-4.51725	0	1	0	0	0	0
Sopen01g003080	0.0137008	5.29596	0.00932618	0.923066	14.7353	11.5384	12.5473	14.5804
Sopen01g003090	-0.507579	5.92541	14.0197	0.000181022	51.3364	47.5407	67.4855	73.4123
Sopen01g003100	0.0250227	4.48056	0.0251806	0.873918	12.039	12.4484	11.8706	13.0955
Sopen01g003110	-0.519362	5.2906	13.3162	0.000263268	9.69532	11.0624	14.5544	15.3832
Sopen01g003120	-0.183032	3.7512	1.01678	0.313286	4.60985	3.86714	4.61149	4.74201
Sopen01g003130	-0.453075	6.48997	11.6539	0.000640976	23.8381	24.785	32.1427	35.5553
Sopen01g003140	-0.930495	-0.0928974	2.48209	0.115153	0.248563	0.535775	0.666393	1.09812
Sopen01g003150	0.704227	2.80453	9.11181	0.00254035	2.11296	2.17949	0.634701	2.15406
Sopen01g003160	-0.177489	1.60822	0.287513	0.59182	3.56463	3.45446	5.69542	4.99729
Sopen01g003170	0.134301	3.20851	0.422776	0.515557	5.9375	6.92425	8.53495	3.73335
Sopen01g003180	-6.20474	-2.8674	6.00738	0.014248	0	0	0.217101	0.184296
Sopen01g003190	2.24845	-4.3469	0.375956	0.539777	0	0	0	0
Sopen01g003200	0	-4.51725	0	1	0	0	0	0
Sopen01g003210	-1.5876	6.80636	137.721	8.84786e-32	59.4518	60.4909	207.492	159.04
Sopen01g003220	-0.00636036	3.83176	0.00127247	0.971544	22.2088	24.5971	23.8081	23.8966
Sopen01g003230	-1.01758	-4.05681	0.139399	0.70888	0	0	0.044394	0.074148
Sopen01g003240	0.489959	3.70227	7.08696	0.00776608	15.1658	11.2803	9.53679	10.1951
Sopen01g003250	-6.50384	0.997351	97.4044	5.80619e-23	0	0.018009	1.80354	1.63293
Sopen01g003260	-1.5443	-3.93105	0.368013	0.544091	0	0.070059	0.061066	0.103976
Sopen01g003270	0.922466	1.90651	9.08662	0.00257558	2.28689	2.26062	1.27903	1.31185
Sopen01g003280	-0.360997	5.41007	6.60045	0.0101969	27.7826	28.0562	38.3291	33.868
Sopen01g003290	-0.303477	3.80312	2.85719	0.0909698	8.77611	7.74366	10.4211	10.0957
Sopen01g003300	-1.64012	3.09618	55.8383	7.93935e-14	1.61323	1.67703	4.84254	6.06582
Sopen01g003310	-0.641841	3.12442	9.14338	0.00249689	16.9578	15.8522	26.6665	23.3621
Sopen01g003320	0.00978698	3.01793	0.00202539	0.964104	6.77408	6.15251	6.34656	5.2126
Sopen01g003330	1.74751	4.82197	127.515	1.50072e-29	24.412	24.5392	7.28158	7.9553
Sopen01g003340	0.942082	0.569906	3.82652	0.0504506	2.50802	3.12167	0.689152	2.6014
Sopen01g003350	2.53026	1.76556	52.1512	5.17912e-13	7.70395	7.8091	0.689052	2.02837
Sopen01g003360	1.70748	1.44957	21.7181	3.16256e-06	1.64985	1.62402	0.73321	0.594543
Sopen01g003370	0	-4.51725	0	1	0	1e-06	0.04836	0.18314
Sopen01g003380	0.818266	3.0501	14.1324	0.000170495	11.2572	15.1059	7.38561	7.81676
Sopen01g003390	0.949181	5.05912	41.7427	1.0464e-10	10.6111	10.4632	6.3153	5.32663
Sopen01g003400	-1.03611	6.82801	60.2793	8.31724e-15	66.0149	69.2015	144.721	136.636
Sopen01g003410	-0.429096	3.55449	5.0883	0.0240902	2.75414	2.73747	3.65578	4.32164
Sopen01g003420	-6.06144	3.63871	581.711	4.07384e-128	0.201378	0.132044	10.446	11.2712
Sopen01g003430	-10.2713	0.749426	92.4307	7.14364e-22	0	0	2.79685	3.13578
Sopen01g003440	-0.606934	3.47184	9.75546	0.00178847	6.68278	7.00873	11.1751	10.1648
Sopen01g003450	-0.221816	6.05001	2.72265	0.0989372	44.0772	40.7627	46.8673	53.4278
Sopen01g003460	-0.53328	3.88778	9.11663	0.00253367	13.4099	8.12024	16.2807	16.0697
Sopen01g003470	0.509751	3.40127	6.64225	0.00996036	9.98629	10.3783	6.29834	7.52308
Sopen01g003480	-0.150933	-4.19624	0.00251632	0.959993	0	0	0.023464	0
Sopen01g003490	1.51183	-3.42648	0.583464	0.44496	0	0.117455	0.025847	0
Sopen01g003500	0.702014	2.45073	7.45036	0.00634361	3.2184	4.19033	2.50716	2.0299
Sopen01g003510	-5.55194	-3.28313	4.09124	0.043109	0	0	0.100461	0
Sopen01g003520	-2.95528	3.43907	192.118	1.21606e-43	0.984782	0.903282	7.18952	5.46924
Sopen01g003530	0	-4.51725	0	1	0	0	0	0
Sopen01g003540	-0.198231	3.83705	1.23795	0.26587	5.13453	5.08432	5.67141	6.14529
Sopen01g003550	-0.367582	7.69168	7.41102	0.00648379	232.889	229.769	306.201	303.255
Sopen01g003560	4.30737	-3.81632	1.71965	0.189742	0	0.192556	0	0
Sopen01g003570	0.402908	3.60778	4.59583	0.0320525	9.10314	8.94722	6.72628	7.10267
Sopen01g003580	-0.389822	6.53019	8.64939	0.00327254	63.0345	74.5187	96.64	83.8004
Sopen01g003590	-6.01546	-2.99417	5.37975	0.020374	0	0	3.07732	1.85918
Sopen01g003600	0.368014	1.66113	1.26174	0.261325	2.61611	2.79213	1.6915	2.70007
Sopen01g003610	0.200536	1.37859	0.315183	0.574518	2.1316	1.5077	1.51318	1.50497
Sopen01g003620	0.522026	4.949	12.4534	0.000417438	21.6865	21.2147	14.4047	17.4157
Sopen01g003630	0.468602	5.83653	11.8335	0.000582001	41.1265	44.9097	34.2587	29.5655
Sopen01g003640	-0.0222227	6.33496	0.0279437	0.867242	220.874	207.839	222.613	255.369
Sopen01g003650	-1.08692	2.67683	20.1083	7.3268e-06	4.66292	4.81791	9.36343	10.9032
Sopen01g003660	-1.44066	8.56885	97.5185	5.48118e-23	110.59	110.145	280.435	338.255
Sopen01g003670	0.194407	6.59504	2.15979	0.141667	17.0053	17.0236	14.5038	15.8719
Sopen01g003680	3.02776	3.4144	194.729	3.28429e-44	7.32371	9.31393	1.09207	1.08854
Sopen01g003690	-0.669346	4.68852	19.0425	1.27981e-05	6.94016	6.44025	11.5778	9.90542
Sopen01g003700	0.850288	4.72666	30.8341	2.81841e-08	10.1424	9.05851	5.17903	5.71409
Sopen01g003710	0.566671	4.75665	13.9357	0.000189292	12.0009	10.1666	7.70452	7.79016
Sopen01g003720	-0.709417	5.36801	25.1014	5.44966e-07	12.1766	16.1062	24.8702	21.8479
Sopen01g003730	0.689159	3.56892	13.0974	0.000295862	10.9908	8.81609	6.01095	7.26469
Sopen01g003740	1.58269	2.77251	43.2549	4.83158e-11	11.1164	5.39797	2.80797	3.22033
Sopen01g003750	-1.39891	5.91799	102.91	3.61345e-24	15.9939	16.9733	41.6501	45.4852
Sopen01g003760	-3.26288	-4.19316	0.890759	0.345274	0	0	0	0
Sopen01g003770	0.383824	3.68296	4.32446	0.0375712	19.1357	17.4569	16.3277	13.4591
Sopen01g003780	0.199687	3.20702	0.930083	0.334844	15.543	12.4052	12.4027	12.772
Sopen01g003790	0.0392559	4.19737	0.0561636	0.812666	20.6925	21.49	21.612	21.6462
Sopen01g003800	0.296286	4.6951	3.76228	0.0524242	22.5462	20.1156	16.8052	19.1986
Sopen01g003810	0.321443	4.50619	4.1808	0.0408873	14.4563	13.6523	11.8326	11.2908
Sopen01g003820	-1.42322	-0.948288	3.24204	0.0717744	0.394286	0.1865	0.612475	0.840921
Sopen01g003830	0.183632	6.37692	1.91099	0.166857	36.7257	34.6012	31.1251	34.5291
Sopen01g003840	0.866365	5.33906	37.0094	1.18033e-09	14.2184	14.756	7.28478	7.96112
Sopen01g003850	1.88911	7.9127	179.318	7.47478e-41	190.364	163.552	43.3669	55.3356
Sopen01g003860	0.623269	4.15114	13.776	0.000206072	17.3691	17.4225	9.08844	12.4861
Sopen01g003870	2.7152	-3.34349	1.57573	0.209381	0	0	0	0
Sopen01g003880	0.484458	5.2071	11.3947	0.00073686	81.0296	82.2567	61.9885	57.4685
Sopen01g003890	0.172791	6.29965	1.68466	0.19431	75.3678	73.9333	62.0749	74.5385
Sopen01g003900	1.26897	-1.13803	2.20831	0.137273	0.508161	0.505418	0.307293	0.325716
Sopen01g003910	1.62279	-1.58745	2.6076	0.106356	0.113858	0.102069	0.090454	0.03812
Sopen01g003920	2.79283	-1.78799	5.30169	0.021307	0.382685	0.21542	0.081774	0
Sopen01g003930	1.36499	3.86721	56.7948	4.88247e-14	12.2053	13.5579	3.42106	6.77865
Sopen01g003940	0	-4.51725	0	1	0	0	0	0
Sopen01g003950	4.54796	-3.71512	2.01672	0.155579	0	0.153999	0	0
Sopen01g003960	1.01422	4.76853	44.1022	3.13439e-11	18.0468	16.7257	8.63987	8.96153
Sopen01g003970	-1.30245	-1.98952	1.44826	0.228811	0	0	0.503554	0
Sopen01g003980	0.424618	3.93169	5.88988	0.0152301	19.8903	21.0066	15.2935	14.6436
Sopen01g003990	0.372392	3.58605	3.89243	0.0485072	10.4019	11.2893	9.42862	8.15877
Sopen01g004000	0.513308	3.29754	6.39869	0.0114222	4.62417	4.8166	3.44065	3.54528
Sopen01g004010	0	-4.51725	0	1	0	0	1e-06	3e-06
Sopen01g004020	0.0955922	3.24599	0.217666	0.640826	7.14222	6.86857	6.72735	6.94659
Sopen01g004030	1.245	-1.74489	1.41807	0.233724	0	0.109133	0.023901	0.202819
Sopen01g004040	0.441366	-1.42727	0.244679	0.620848	0.294009	0.177719	0.214458	0.131773
Sopen01g004050	-5.90263	-3.06608	5.04278	0.0247312	0	0	0.599836	0.297258
Sopen01g004060	0.0573818	1.73215	0.0324471	0.85705	1.50286	1.60747	1.68961	1.59481
Sopen01g004070	-0.885424	4.38581	30.0718	4.1746e-08	11.2611	12.7648	21.3489	21.8383
Sopen01g004080	4.29846	-3.82094	1.71284	0.190621	0	0	0	0
Sopen01g004090	-1.1258	6.33607	69.9534	6.15778e-17	37.9692	40.6277	91.999	81.3743
Sopen01g004100	-1.57194	6.00488	129.886	4.55114e-30	16.7784	16.8673	45.6532	42.6498
Sopen01g004110	0	-4.51725	0	1	0	0	0	0
Sopen01g004120	-1.67412	2.4786	40.7465	1.74151e-10	1.03377	1.284	1.98341	5.46493
Sopen01g004130	0	-4.51725	0	1	0	0	0	0
Sopen01g004140	-6.37656	2.38108	274.073	1.81259e-61	0.230111	0.103805	7.82627	17.5574
Sopen01g004150	0	-4.51725	0	1	0	0	0	0
Sopen01g004160	-9.45823	-0.0520022	48.5207	3.29051e-12	0	0	1.20957	1.3198
Sopen01g004170	3.11345	6.17445	458.216	2.1079e-101	92.1904	86.8197	12.7804	8.52486
Sopen01g004180	1.97947	2.49641	55.6129	8.90331e-14	6.61257	5.00873	1.60582	1.18212
Sopen01g004190	6.5632	-2.48334	6.90571	0.00859354	0.273006	0.264539	0	0
Sopen01g004200	-5.32375	-3.41803	3.52271	0.0605365	0	0	0.112552	0.254011
Sopen01g004210	-7.88619	2.37629	309.448	3.76289e-69	0	0.109607	5.89412	6.58508
Sopen01g004220	-0.336481	4.31644	4.2972	0.038178	12.8881	13.9101	15.5912	19.4518
Sopen01g004230	0	-4.51725	0	1	0	0	0	0
Sopen01g004240	5.71206	1.80815	157.378	4.5377e-36	5.55103	5.34728	0.206305	0
Sopen01g004250	0.792955	4.27932	23.2833	1.4004e-06	13.2257	15.5846	9.36779	8.68716
Sopen01g004260	0	-4.51725	0	1	0	0	0	0
Sopen01g004270	0.214389	-0.666798	0.093977	0.759181	7.35074	5.8397	5.5993	3.88325
Sopen01g004280	0.337771	6.41379	6.46631	0.0109955	26.4932	26.2526	20.3331	22.8434
Sopen01g004290	0.810087	4.01814	21.9621	2.78493e-06	16.987	13.9501	9.27153	10.449
Sopen01g004300	0.703314	6.9901	28.0349	1.19424e-07	71.7053	96.8067	54.1535	55.3268
Sopen01g004310	0.547346	3.00465	6.22862	0.012572	2.0595	2.59779	1.60745	1.72175
Sopen01g004320	0.38276	3.59127	4.11408	0.0425305	10.8076	12.0376	8.35716	10.3926
Sopen01g004330	0.557249	5.33766	15.4495	8.48036e-05	48.4704	44.0973	30.596	31.5702
Sopen01g004340	-7.32396	2.3696	296.783	2.1156e-66	0	0.02663	5.717	6.54444
Sopen01g004350	0.232478	5.47119	2.76992	0.0960542	27.5436	24.9745	21.9712	24.5567
Sopen01g004360	-5.19931	6.877	1068.62	5.12246e-233	3.8823	2.78847	128.613	118.2
Sopen01g004370	0	-4.51725	0	1	0	0	0	0
Sopen01g004380	1.14122	3.29304	30.7827	2.89415e-08	4.85132	4.55595	2.43895	1.99991
Sopen01g004390	0.117399	2.37214	0.201967	0.653138	3.06312	2.75263	2.8409	2.40601
Sopen01g004400	-0.3632	-0.904747	0.234007	0.62857	0.212141	0.258961	0.414455	0.221488
Sopen01g004410	-0.255463	4.62567	2.74435	0.097602	16.7221	15.005	20.8635	18.5994
Sopen01g004420	-0.232336	3.38561	1.37912	0.240254	7.78792	4.33422	6.12621	7.45965
Sopen01g004430	-4.76912	-3.69401	2.47989	0.115314	0	0	0.14899	0.759625
Sopen01g004440	-0.0258122	7.31136	0.0376902	0.846067	148.573	148.017	150.159	153.583
Sopen01g004450	0.316564	8.99488	4.51138	0.0336729	174.795	175.868	131.083	154.113
Sopen01g004460	0.221479	7.85527	2.65074	0.103505	72.6058	70.9347	62.6071	64.2024
Sopen01g004470	0.568559	2.88319	6.29864	0.0120848	9.2704	7.08279	6.21647	4.93612
Sopen01g004480	0.601796	4.24711	13.3293	0.000261444	14.9141	15.1475	10.3306	10.089
Sopen01g004490	-0.532411	4.96841	13.0286	0.000306943	17.9605	20.4173	30.8137	26.3498
Sopen01g004500	1.86654	6.50047	185.773	2.93146e-42	96.8118	109.861	29.1133	29.0986
Sopen01g004510	1.30835	6.98835	94.7565	2.20853e-22	290.915	252.974	121.454	98.507
Sopen01g004520	0.296181	5.47839	4.49788	0.0339397	20.464	18.5297	14.2552	17.4919
Sopen01g004530	-1.62306	2.14783	31.4673	2.03421e-08	1.31406	1.35811	2.56516	5.77284
Sopen01g004540	0.386661	6.32382	8.42788	0.003696	39.7039	39.8497	31.1052	31.2196
Sopen01g004550	0.28547	5.62162	4.27728	0.038628	27.9774	27.3858	23.707	22.8246
Sopen01g004560	0.639864	3.35367	10.1999	0.00140494	5.42177	5.78427	3.86108	3.31799
Sopen01g004570	-0.58965	1.69118	3.32512	0.0682322	6.38453	3.04002	8.32735	7.65537
Sopen01g004580	0.123289	6.33199	0.85974	0.353814	23.7347	22.6444	22.5188	21.1452
Sopen01g004590	0.224521	5.99203	2.7732	0.0958578	43.3429	39.5608	34.3022	39.9596
Sopen01g004600	0.376365	4.70487	6.08328	0.0136485	15.0924	14.489	13.5162	11.4363
Sopen01g004610	0	-4.51725	0	1	0	0	0	0
Sopen01g004620	-0.712258	3.27717	12.147	0.000491903	6.38174	6.67314	9.58563	11.9041
Sopen01g004630	-1.32102	5.74036	90.1559	2.25249e-21	28.3412	32.6106	81.3779	73.5651
Sopen01g004640	-2.55493	7.2271	330.032	1.28152e-73	17.0205	16.9326	110.825	91.786
Sopen01g004650	-0.20449	5.42207	2.12624	0.144799	14.8579	14.4685	17.8285	16.2224
Sopen01g004660	0.683903	-4.06144	0.0618856	0.803541	0	0	0.028546	0
Sopen01g004670	-7.89615	0.614864	78.4556	8.32635e-19	0	0.058222	2.64427	6.022
Sopen01g004680	0	-4.51725	0	1	0	0	0	0
Sopen01g004690	-6.57661	0.139192	50.4103	1.25654e-12	0	0	2.25072	5.83718
Sopen01g004700	-0.719441	5.32438	25.5986	4.21171e-07	6.56666	5.85668	10.99	9.84255
Sopen01g004710	0.690103	-4.05831	0.0628383	0.802065	0	0.009683	0.008472	0
Sopen01g004720	3.61808	-2.81323	3.46507	0.0626811	0	0.190257	0	0.03167
Sopen01g004730	-0.214613	2.52681	0.739722	0.389752	13.3996	7.53133	14.1697	13.3072
Sopen01g004740	0.358697	-0.156541	0.363527	0.546556	1.17817	1.68631	1.31013	0.705845
Sopen01g004750	-8.12333	-1.29953	19.1314	1.2216e-05	0	0	0.750898	0.481705
Sopen01g004760	-2.39938	-4.34867	0.455869	0.499563	0	0	0	0
Sopen01g004770	0.151127	5.881	1.24239	0.265013	14.9233	14.9983	14.0938	13.8772
Sopen01g004780	0.343254	4.81608	5.2201	0.0223295	16.0378	17.3717	13.1834	13.8785
Sopen01g004790	-1.29073	6.8476	92.4888	6.93701e-22	18.2133	18.5695	48.9382	42.8038
Sopen01g004800	-4.07509	-0.55133	20.8915	4.86685e-06	0	0.324104	1.39216	0.972154
Sopen01g004810	-1.04237	6.71296	60.9572	5.89547e-15	45.6052	50.3114	96.7463	99.7969
Sopen01g004820	-2.39938	-4.34867	0.455869	0.499563	0	0	0.03061	0
Sopen01g004830	0	-4.51725	0	1	0	0	0	0
Sopen01g004840	-4.7222	0.203736	41.8277	1.0019e-10	0	0.048027	0.754243	1.52654
Sopen01g004850	2.2453	-4.34849	0.375425	0.540063	0	0	0	0
Sopen01g004860	0	-4.51725	0	1	0	0	0	0
Sopen01g004870	0	-4.51725	0	1	0	0	0	0
Sopen01g004880	-0.508669	-3.41751	0.0773375	0.780939	0	0	0	0.11222
Sopen01g004890	0.327049	2.82838	2.03403	0.153815	2.99262	3.30635	2.83489	1.92118
Sopen01g004900	0.645111	2.36609	5.98329	0.014444	5.79927	5.62483	3.32795	3.81819
Sopen01g004910	2.2453	-4.34849	0.375425	0.540063	0	0	0	0
Sopen01g004920	-0.15408	-4.19781	0.00260119	0.959324	0	0	0.05291	0
Sopen01g004930	-1.65915	8.97819	118.268	1.57584e-27	158.941	174.99	538.361	540.924
Sopen01g004940	-2.14451	3.74164	126.587	2.39355e-29	5.9564	4.18812	26.2421	21.0624
Sopen01g004950	2.2453	-4.34849	0.375425	0.540063	0	0	0	0
Sopen01g004960	0.673041	-4.05664	0.0601533	0.806254	0	0	0	0.135575
Sopen01g004970	0	-4.51725	0	1	0	0	0	0
Sopen01g004980	0.359218	5.49879	6.63447	0.010004	29.3715	29.8396	25.1944	23.7236
Sopen01g004990	0.937899	3.82989	27.0522	1.98466e-07	34.2907	28.5914	15.3277	17.0913
Sopen01g005000	0	-4.51725	0	1	0	0	0	0
Sopen01g005010	5.08913	1.83645	144.433	3.02971e-33	5.7618	5.83361	0.281461	0.118132
Sopen01g005020	-0.559079	3.75152	9.42931	0.00213608	5.54532	7.7305	9.93089	10.688
Sopen01g005030	0	-4.51725	0	1	0	0	0	0
Sopen01g005040	0	-4.51725	0	1	0	0	0	0
Sopen01g005050	0	-4.51725	0	1	0	0	0	0
Sopen01g005060	0	-4.51725	0	1	0	0	0	0
Sopen01g005070	-0.400385	6.13327	8.91664	0.0028266	68.0386	67.0229	91.5326	92.1299
Sopen01g005080	0	-4.51725	0	1	0	0	0	0
Sopen01g005090	0	-4.51725	0	1	0	0	0	0
Sopen01g005100	0.622536	3.20128	8.90703	0.00284151	11.3715	13.4059	6.97519	9.33322
Sopen01g005110	-2.41024	-4.3438	0.45798	0.498571	0	0	0	0.10927
Sopen01g005120	0	-4.51725	0	1	0	0	0	0
Sopen01g005130	-2.39938	-4.34867	0.455869	0.499563	0	0	0	0
Sopen01g005140	-0.0370292	5.01227	0.0640373	0.800226	29.5491	29.6182	29.8243	32.6984
Sopen01g005150	-0.108995	3.83185	0.373505	0.541101	13.3378	13.4789	13.6675	16.1474
Sopen01g005160	0.0376816	4.00884	0.0481029	0.826398	13.5564	14.1401	13.9817	13.6753
Sopen01g005170	-2.39938	-4.34867	0.455869	0.499563	0	0	0	0
Sopen01g005180	0	-4.51725	0	1	0	0	0	0
Sopen01g005190	-1.01866	1.41568	8.12762	0.00436059	1.08937	1.23769	2.27441	2.38228
Sopen01g005200	0.949693	-3.1338	0.330914	0.565123	0	0.029486	0.052386	0
Sopen01g005210	-0.555159	-3.61736	0.0770101	0.781391	0	0.027643	0.02023	0
Sopen01g005220	-7.56489	0.309929	60.6887	6.75631e-15	0	0	1.88693	1.27764
Sopen01g005230	5.51789	-3.2025	3.69841	0.0544675	0	0	0	0
Sopen01g005240	0	-4.51725	0	1	0	0	0	0
Sopen01g005250	-0.150933	-4.19624	0.00251632	0.959993	0	0	0.008467	0
Sopen01g005260	0	-4.51725	0	1	0	0	0	0
Sopen01g005270	0	-4.51725	0	1	77.8143	84.1588	78.8134	70.6132
Sopen01g005290	0	-4.51725	0	1	0	0	0	0
Sopen01g005300	-10.0636	0.551836	78.5793	7.82141e-19	0	0	4.50163	3.88405
Sopen01g005310	-7.57998	1.15277	118.291	1.55773e-27	0	0	4.01475	4.71037
Sopen01g005320	0	-4.51725	0	1	0	0	0	0
Sopen01g005330	0.267728	5.7248	3.81957	0.0506603	112.656	92.2919	72.3256	63.6412
Sopen01g005340	0	-4.51725	0	1	0	0	0	0
Sopen01g005350	-0.0620966	5.08128	0.183057	0.668761	14.9185	13.0265	15.0098	14.2582
Sopen01g005360	-0.150933	-4.19624	0.00251632	0.959993	0	0.010109	0.008825	0
Sopen01g005370	2.2453	-4.34849	0.375425	0.540063	0	0	0	0
Sopen01g005380	0.859588	2.78231	13.4495	0.000245218	12.3339	13.0262	7.6417	6.53361
Sopen01g005390	-1.25233	4.70101	65.3854	6.23511e-16	14.5709	15.3749	38.0142	31.2269
Sopen01g005400	1.47232	0.536797	8.84034	0.00294722	1.07124	0.774387	0.32906	0.455547
Sopen01g005410	-3.2522	-4.19799	0.886732	0.346367	0	0	0.037067	0
Sopen01g005420	-1.93235	-3.81843	0.635721	0.425267	0	0	0.047327	0.026472
Sopen01g005430	7.23524	3.49903	597.642	1.47046e-131	64.8142	44.3373	0.193629	0.839827
Sopen01g005440	7.796	1.58166	156.452	7.2237e-36	15.0308	14.386	0.203101	0
Sopen01g005450	4.79463	-0.722373	19.3729	1.07644e-05	2.65521	2.66232	0.239042	0.211751
Sopen01g005460	-2.39938	-4.34867	0.455869	0.499563	0	0	0.008782	0
Sopen01g005470	0	-4.51725	0	1	0	0	0	0
Sopen01g005480	-0.15408	-4.19781	0.00260119	0.959324	0	0	0	0
Sopen01g005490	0	-4.51725	0	1	0	0	0	0
Sopen01g005500	0	-4.51725	0	1	0	0	0	0
Sopen01g005510	-0.164942	-4.19298	0.00290085	0.957047	0	0	0	0
Sopen01g005520	-3.84634	3.34512	277.992	2.55277e-62	0.407873	0.490932	6.63089	5.01821
Sopen01g005530	0	-4.51725	0	1	0	0	0	0
Sopen01g005540	0.52882	3.9342	9.1251	0.00252197	12.1569	12.7181	8.65849	8.38692
Sopen01g005550	0.190416	6.3855	2.05562	0.151649	81.0341	76.3885	65.9627	73.1348
Sopen01g005560	-0.795877	2.16445	8.0482	0.0045559	2.0609	1.94007	2.83549	4.10093
Sopen01g005570	0	-4.51725	0	1	0	0	0	0
Sopen01g005580	3.91715	2.63586	184.115	6.73303e-42	14.1656	15.773	1.18832	0.830423
Sopen01g005590	-1.22355	5.25321	71.5705	2.71473e-17	6.08289	6.36015	13.5709	15.6082
Sopen01g005600	0.2756	6.61597	4.33967	0.0372369	67.2695	65.8684	57.2925	54.2673
Sopen01g005610	-1.71098	5.08037	131.137	2.42633e-30	33.9737	47.5685	151.413	122.903
Sopen01g005620	-0.7876	-0.19619	1.69309	0.193198	0	0.104298	0.045357	0.15304
Sopen01g005630	-5.1425	-3.51352	3.15836	0.0755422	0	0	0.108544	0.036433
Sopen01g005640	-2.39938	-4.34867	0.455869	0.499563	0	0	0	0
Sopen01g005650	0	-4.51725	0	1	0	0	0	0
Sopen01g005660	0	-4.51725	0	1	0	0	0	0
Sopen01g005670	-2.32854	4.277	182.788	1.31049e-41	2.27646	2.59205	11.9802	11.9358
Sopen01g005680	0	-4.51725	0	1	0	0	0	0
Sopen01g005690	0	-4.51725	0	1	0	0	0	0
Sopen01g005700	-2.39938	-4.34867	0.455869	0.499563	0	0	0	0
Sopen01g005710	-2.41024	-4.3438	0.45798	0.498571	0	0	0	0
Sopen01g005720	1.52262	3.28584	53.2654	2.9379e-13	7.39804	6.92182	2.62975	2.486
Sopen01g005730	3.60911	-4.06126	1.07105	0.300711	0	0	0	0
Sopen01g005740	0	-4.51725	0	1	0	0	0	0
Sopen01g005750	-2.39938	-4.34867	0.455869	0.499563	0	0	0.017215	0
Sopen01g005760	-3.2522	-4.19799	0.886732	0.346367	0	0	0.004272	0
Sopen01g005770	0	-4.51725	0	1	0	0	0	0
Sopen01g005780	0	-4.51725	0	1	0	0	0	0
Sopen01g005790	-4.74344	2.2382	186.522	2.01321e-42	0.589407	0.678471	15.3475	14.9214
Sopen01g005800	-6.71251	1.96016	208.767	2.88371e-47	0	0.083364	12.3373	16.2348
Sopen01g005810	-2.12377	-1.92863	3.48968	0.0617557	0	0.036695	0.076116	0.043931
Sopen01g005820	1.16061	0.496666	5.49479	0.0190753	1.17368	1.09837	0.665525	0.765475
Sopen01g005830	1.66249	5.51433	135.033	3.41779e-31	196.991	229.967	56.9313	82.0609
Sopen01g005840	0	-4.51725	0	1	0	0	0	0
Sopen01g005850	2.24845	-4.3469	0.375956	0.539777	0	0	0	0
Sopen01g005860	-1.01805	2.76862	18.6705	1.55538e-05	4.01637	3.90034	7.31814	7.91009
Sopen01g005870	-1.55555	1.26219	16.4755	4.93252e-05	0.744944	0.420672	1.19157	1.3417
Sopen01g005880	0	-4.51725	0	1	0	0	0	0
Sopen01g005890	-0.0329258	5.80647	0.0584748	0.808924	87.3436	99.1904	103.028	101.119
Sopen01g005900	-4.64441	-2.31	7.28475	0.00695552	0	0.033896	0.298227	0.201365
Sopen01g005910	1.17073	4.26922	49.771	1.74016e-12	17.7903	15.4477	8.08781	6.33079
Sopen01g005920	0	-4.51725	0	1	0	0	0	0
Sopen01g005930	-2.46507	5.02208	253.549	5.23445e-57	8.00113	11.6196	55.1028	61.7697
Sopen01g005940	3.60911	-4.06126	1.07105	0.300711	0	0	0	0
Sopen01g005950	7.47421	3.30503	543.377	7.88998e-120	20.782	14.6617	0.104206	0.180682
Sopen01g005960	0	-4.51725	0	1	0	0	0	0
Sopen01g005970	-0.0929988	4.12903	0.307005	0.579525	5.9536	7.04055	6.51772	7.76622
Sopen01g005980	2.24845	-4.3469	0.375956	0.539777	0	0	0	0
Sopen01g005990	2.32533	-0.229499	11.3707	0.000746426	0.542358	0.681917	0.185224	0.18848
Sopen01g006000	-5.63794	3.87238	605.617	2.78182e-133	0.349415	0.365306	17.4728	16.2442
Sopen01g006010	-1.01443	-4.05525	0.138624	0.709654	0	0	0.010162	0
Sopen01g006020	-5.19247	-3.48997	3.22573	0.0724929	0	0	0	0.137062
Sopen01g006030	2.2453	-4.34849	0.375425	0.540063	0	0	0	0
Sopen01g006040	2.2453	-4.34849	0.375425	0.540063	0	0	0	0
Sopen01g006050	-1.37656	5.88672	99.4191	2.10147e-23	14.3857	13.4414	33.1581	33.7437
Sopen01g006060	-0.109461	4.46558	0.47954	0.488633	9.98751	8.87104	9.60406	10.302
Sopen01g006070	0.844046	2.77363	12.9146	0.000326203	3.63255	3.32837	2.10618	2.27609
Sopen01g006080	0	-4.51725	0	1	0.976001	1.11465	0.435993	0.487052
Sopen01g006090	-2.90197	7.08627	415.65	3.49292e-92	15.3306	16.4986	143.526	105.046
Sopen01g006100	0	-4.51725	0	1	0	0	0	0
Sopen01g006110	0	-4.51725	0	1	0	0	0	0
Sopen01g006120	0	-4.51725	0	1	0	0	0	0
Sopen01g006130	0	-4.51725	0	1	0	0	0	0
Sopen01g006140	-0.164942	-4.19298	0.00290085	0.957047	0	0	0	0
Sopen01g006150	0	-4.51725	0	1	0	0	0	0
Sopen01g006160	0.0105308	1.368	0.000862797	0.976567	1.12765	1.08252	0.823519	1.31082
Sopen01g006170	-0.866375	3.73047	22.2242	2.4296e-06	5.16387	4.4233	8.39165	9.85531
Sopen01g006180	-2.39938	-4.34867	0.455869	0.499563	0	0	0	0
Sopen01g006190	0.112071	5.69918	0.667674	0.413866	72.0951	65.8421	62.7704	67.2628
Sopen01g006200	0	-4.51725	0	1	0	0	0	0
Sopen01g006210	3.08949	-4.19448	0.73345	0.391769	0	0.012772	0	0
Sopen01g006220	0.135501	3.57507	0.513951	0.473435	6.62069	5.65864	6.12612	6.29797
Sopen01g006230	-0.185342	7.22384	1.95053	0.162534	175.045	160.625	197.814	196.254
Sopen01g006240	-0.258309	4.44986	2.65316	0.103347	17.4326	16.9791	22.2238	27.1381
Sopen01g006250	-9.31658	2.88046	474.979	4.95351e-105	0	0	10.7268	11.4042
Sopen01g006260	2.2453	-4.34849	0.375425	0.540063	0	0	0	0
Sopen01g006270	-0.44908	4.83485	8.97189	0.0027424	37.5257	27.2415	44.8066	44.6658
Sopen01g006280	0.580788	3.15746	7.59962	0.00583925	8.32054	8.33404	5.23521	6.28499
Sopen01g006290	0	-4.51725	0	1	0	0	0	0
Sopen01g006300	-0.0645113	4.43384	0.164941	0.684649	11.8741	11.7686	14.0951	11.1322
Sopen01g006310	2.2453	-4.34849	0.375425	0.540063	0	0	0	0
Sopen01g006320	-0.720698	2.97534	10.601	0.00113067	2.7505	2.93889	4.41747	6.26699
Sopen01g006330	2.56782	-0.828599	8.71223	0.00316163	2.37882	2.10096	0.132066	0.675672
Sopen01g006340	4.29638	0.0823538	32.0579	1.50102e-08	0.424837	0.477741	0.03377	0
Sopen01g006350	3.07282	-0.844077	11.2712	0.000787523	0.302508	0.457956	0.019788	0
Sopen01g006360	2.88417	2.50835	106.169	6.99046e-25	2.77512	2.91437	0.349244	0.488155
Sopen01g006370	0	-4.51725	0	1	0	0	0	0
Sopen01g006380	2.2453	-4.34849	0.375425	0.540063	0	0	0	0
Sopen01g006390	-0.840761	-2.6744	0.394428	0.529982	0	0.047067	0.123581	0.034955
Sopen01g006400	8.52548	1.47172	146.555	1.04307e-33	0.800439	0.607956	0	0
Sopen01g006410	2.91184	6.10088	405.137	6.6267e-90	123.756	108.788	12.266	17.2404
Sopen01g006420	-3.30678	3.76538	270.704	9.78256e-61	1.65934	2.46749	25.5814	22.5403
Sopen01g006430	-0.267583	5.04953	3.3697	0.066409	13.2837	12.289	16.003	15.9041
Sopen01g006440	0	-4.51725	0	1	0	0	0	0
Sopen01g006450	-0.150933	-4.19624	0.00251632	0.959993	0	0	0	0
Sopen01g006460	0	-4.51725	0	1	0	0	0	0
Sopen01g006470	0	-4.51725	0	1	0	0	0	0
Sopen01g006480	0	-4.51725	0	1	0	0	0	0
Sopen01g006490	0	-4.51725	0	1	0	0	0	0
Sopen01g006500	-3.26288	-4.19316	0.890759	0.345274	0	0	0.014451	0.02539
Sopen01g006510	0	-4.51725	0	1	0	0	0	0
Sopen01g006520	0	-4.51725	0	1	0	0	0	0
Sopen01g006530	0	-4.51725	0	1	0	0	0	0
Sopen01g006540	0	-4.51725	0	1	0	0	0	0
Sopen01g006550	0	-4.51725	0	1	0	0	0	0
Sopen01g006560	0	-4.51725	0	1	0	0	0	0
Sopen01g006570	0	-4.51725	0	1	0	0	0	0
Sopen01g006580	0	-4.51725	0	1	0	0	0	0
Sopen01g006590	2.24845	-4.3469	0.375956	0.539777	0	0.010251	0	0
Sopen01g006600	0	-4.51725	0	1	0	0	0	0
Sopen01g006610	0	-4.51725	0	1	0	0	0	0
Sopen01g006620	2.2453	-4.34849	0.375425	0.540063	0	0	0	0
Sopen01g006630	0	-4.51725	0	1	0	0	0	0
Sopen01g006640	-0.219854	3.2224	1.13762	0.286159	9.06753	11.7285	13.2103	11.6808
Sopen01g006650	0.437541	5.16258	9.21254	0.00240432	14.9932	14.9308	10.9121	12.0109
Sopen01g006660	0.73058	3.66094	15.356	8.91025e-05	10.8827	10.0985	7.28752	6.46911
Sopen01g006670	1.1441	-1.75103	1.23694	0.266065	0.113477	0	0	0
Sopen01g006680	1.29765	4.85275	72.8647	1.40971e-17	38.8701	34.6523	16.0338	17.5072
Sopen01g006690	-0.160808	6.02615	1.42848	0.232016	23.6768	24.6615	28.7791	27.826
Sopen01g006700	-0.266714	3.10764	1.57716	0.209174	4.65387	4.37879	5.78567	5.34768
Sopen01g006710	4.31035	-3.81478	1.72193	0.189448	0	0	0	0
Sopen01g006720	3.08638	-4.19606	0.732433	0.392098	0	0	0	0
Sopen01g006730	0	-4.51725	0	1	0	0	0	0
Sopen01g006740	-0.376236	-2.25653	0.105302	0.745558	0	0.059716	0	0
Sopen01g006750	1.45669	2.80224	37.4438	9.44738e-10	9.63512	9.4305	2.93207	4.71891
Sopen01g006760	-0.368786	2.62318	2.3018	0.129228	1.77077	1.51325	2.31839	2.43551
Sopen01g006770	-0.0839071	1.61561	0.0646962	0.799222	1.38939	1.19726	1.91218	1.11524
Sopen01g006780	-0.0218149	5.01279	0.0222281	0.881482	38.987	40.5607	40.9679	44.0593
Sopen01g006790	0.964211	4.38326	35.4514	2.62459e-09	17.5597	14.9785	8.75289	8.84598
Sopen01g006800	-2.39938	-4.34867	0.455869	0.499563	0	0	0	0
Sopen01g006810	0	-4.51725	0	1	0	0	0	0
Sopen01g006820	-2.39938	-4.34867	0.455869	0.499563	0	0	0	0
Sopen01g006830	0.812942	-1.493	0.763487	0.382242	0	0.576471	0	0.285242
Sopen01g006840	0.682251	1.14915	3.06006	0.080242	0.899393	0.693167	0.435643	0.63147
Sopen01g006850	0	-4.51725	0	1	0	0	0	0
Sopen01g006860	2.2453	-4.34849	0.375425	0.540063	0	0	0	0
Sopen01g006870	6.00048	-2.88845	4.95141	0.0260719	0	0	0	0
Sopen01g006880	0	-4.51725	0	1	0	0	0	0
Sopen01g006890	0	-4.51725	0	1	0	0	0	0
Sopen01g006900	5.10861	-3.43823	2.87881	0.089756	0	0	0	0
Sopen01g006910	0	-4.51725	0	1	0	0	0	0
Sopen01g006920	2.2453	-4.34849	0.375425	0.540063	0	0	0	0
Sopen01g006930	0	-4.51725	0	1	0	0	0	0
Sopen01g006940	-0.292463	5.29666	4.24375	0.039398	10.9411	12.7265	15.0388	14.1901
Sopen01g006950	0.232072	2.46342	0.830202	0.362217	2.6688	3.36346	2.43452	2.51885
Sopen01g006960	-0.0599432	7.30762	0.203292	0.652077	251.451	228.65	247.469	251.974
Sopen01g006970	-0.493048	-0.39697	0.581283	0.445812	0	0.141055	0	0.140739
Sopen01g006980	1.23327	2.74793	26.5975	2.51103e-07	7.26979	5.39445	3.3162	2.4499
Sopen01g006990	0	-4.51725	0	1	0	0	0	0
Sopen01g007000	0	-4.51725	0	1	0	0	0	0
Sopen01g007010	1.08065	3.57732	31.8392	1.67983e-08	9.79616	8.15082	4.68542	4.25408
Sopen01g007020	0	-4.51725	0	1	0	0	0	0
Sopen01g007030	-0.217734	6.43052	2.69331	0.100774	17.448	21.8447	23.6576	22.9834
Sopen01g007040	-9.03637	-0.457433	35.4354	2.64624e-09	0	0	0.609622	0.637733
Sopen01g007050	0	-4.51725	0	1	0	0	0	0
Sopen01g007060	0.568089	0.339929	1.24802	0.263935	0.292159	0.239679	0.188966	0.215858
Sopen01g007070	0	-4.51725	0	1	0	0	0	0
Sopen01g007080	0	-4.51725	0	1	0	0	0	0
Sopen01g007090	0	-4.51725	0	1	0	0	0	0
Sopen01g007100	-2.39938	-4.34867	0.455869	0.499563	0	0	0	0
Sopen01g007110	0	-4.51725	0	1	0	0	0	0
Sopen01g007120	2.24845	-4.3469	0.375956	0.539777	0	0	0	0
Sopen01g007130	0	-4.51725	0	1	0	0	0	0
Sopen01g007140	4.73263	-1.99658	7.96829	0.00476144	0	0	0	0
Sopen01g007150	0	-4.51725	0	1	0	0	0	0
Sopen01g007160	0	-4.51725	0	1	0	0	0	0
Sopen01g007170	2.2453	-4.34849	0.375425	0.540063	0	0	0	0
Sopen01g007180	2.2453	-4.34849	0.375425	0.540063	0	0	0	0
Sopen01g007190	0.216016	1.78897	0.47529	0.490565	2.52052	2.58124	2.35184	2.0099
Sopen01g007200	0.774506	-0.923194	1.02459	0.311437	0.096922	0.018254	0.062943	0
Sopen01g007210	0.897884	-2.10597	0.627762	0.428179	0	0	0.041431	0.070576
Sopen01g007220	2.2453	-4.34849	0.375425	0.540063	0	0	0	0
Sopen01g007230	-0.150933	-4.19624	0.00251632	0.959993	0	0.078697	0	0
Sopen01g007240	0	-4.51725	0	1	0	0	0	0
Sopen01g007250	0	-4.51725	0	1	0	0	0	0
Sopen01g007260	0	-4.51725	0	1	0	0	0	0
Sopen01g007270	0	-4.51725	0	1	0	0	0	0
Sopen01g007280	2.2453	-4.34849	0.375425	0.540063	0	0	0	0
Sopen01g007290	0	-4.51725	0	1	0	0	0	0
Sopen01g007300	0.687	-4.05988	0.0623605	0.802804	0	0	0	0
Sopen01g007310	0	-4.51725	0	1	0	0	0	0
Sopen01g007320	0	-4.51725	0	1	0	0	0	0
Sopen01g007330	0	-4.51725	0	1	0	0	0	0
Sopen01g007340	0	-4.51725	0	1	0	0	0	0
Sopen01g007350	0	-4.51725	0	1	0	0	0	0
Sopen01g007360	0.683903	-4.06144	0.0618856	0.803541	0	0	0.007095	0
Sopen01g007370	-0.193109	5.92476	2.03793	0.153422	36.2021	38.0175	40.324	45.496
Sopen01g007380	1.14875	4.66917	54.6309	1.46688e-13	15.0949	16.2952	6.95993	8.05068
Sopen01g007390	-2.39938	-4.34867	0.455869	0.499563	0	0	0	0
Sopen01g007400	0	-4.51725	0	1	0	0	0	0
Sopen01g007410	0	-4.51725	0	1	0	0	0	0
Sopen01g007420	-2.41024	-4.3438	0.45798	0.498571	0	0	0	0
Sopen01g007430	0	-4.51725	0	1	0	0	0	0
Sopen01g007440	0	-4.51725	0	1	0	0	0	0
Sopen01g007450	0	-4.51725	0	1	0	0	0	0
Sopen01g007460	0	-4.51725	0	1	0	0	0	0
Sopen01g007470	3.86984	0.134016	29.76	4.90266e-08	1.02828	0.938758	0.06437	0.072521
Sopen01g007480	0	-4.51725	0	1	0	0	0	0
Sopen01g007490	3.61521	-4.05814	1.07397	0.300053	0	0.023475	0	0
Sopen01g007500	0	-4.51725	0	1	0	0	0	0
Sopen01g007510	0	-4.51725	0	1	0	0	0	0
Sopen01g007520	-6.87502	-2.37254	8.90362	0.00284682	0	0	0.061788	0.034055
Sopen01g007530	-1.91886	-3.82164	0.627572	0.42825	0	0	0	0
Sopen01g007540	2.92618	-1.6763	6.03427	0.0140326	2.43336	2.90882	0.48447	0.4456
Sopen01g007550	1.4466	0.73236	9.75583	0.00178811	1.58252	0.995197	0.172865	0.218814
Sopen01g007560	9.72998	2.64823	382.398	5.6225e-85	31.7004	31.7998	0	0.319956
[truncated: 42,965 more rows]
